# Supplementary material
Source: PubMed Central journal article supplement (PMC3638248)
Supplement: NIHMS455948-supplement-1_si_001.pdf [file NIHMS455948-supplement-1_si_001.pdf]

## Supplementary Materials For

### Synthesis of Large Dendrimers with the Dimensions of Small Viruses

Jongdoo Lim<sup>1</sup>, Mauri Kostianen<sup>2</sup>, Jan Maly<sup>3</sup>, Viviana C. P. da Costa<sup>1</sup>, Onofrio Annunziata<sup>1</sup>, Giovanni M. Pavan<sup>4</sup>,  
Eric E. Simanek<sup>1\*</sup>

<sup>1</sup>Department of Chemistry, Texas Christian University, Fort Worth TX 76129.

<sup>2</sup>Department of Applied Physics, Aalto University, Helsinki Finland.

<sup>3</sup>Department of Biology, J. E. Purkyně University, Ústí nad Labem, Czech Republic.

<sup>4</sup>Department of Innovative Technologies, University of Applied Science of Southern Switzerland (SUPSI),  
Manno 6928, Switzerland.

\*To whom correspondence should be addressed. E-mail: e.simanek@tcu.edu; tel: 817-257-5355

#### Table of Contents

|                                       | Page |
|---------------------------------------|------|
| General Synthetic Procedures.....     | S2   |
| Details of Synthetic Procedures.....  | S2   |
| Spectra of Compounds.....             | S8   |
| NMR Analysis.....                     | S48  |
| HPLC Analysis.....                    | S49  |
| Transmission Electron Microscopy..... | S50  |
| Dynamic Light Scattering.....         | S51  |
| Atomic Force Microscopy.....          | S54  |
| Computational Procedure .....         | S57  |

## General Synthetic Procedures

All chemicals were purchased from Aldrich and Acros and used without further purification. All solvents were ACS grade and used without further purification. HPLC was carried out using an Agilent Technologies 1260 Infinity system and an Agilent Technologies 1260 Infinity DAD detector. NMR spectra were recorded on a Mercury 300 MHz spectrometer in  $\text{CDCl}_3$ . All mass spectral analyses were carried out by an Agilent Technologies 6224 TOF LC/MS system.

## Scheme S1. Synthesis of the Dendrimers

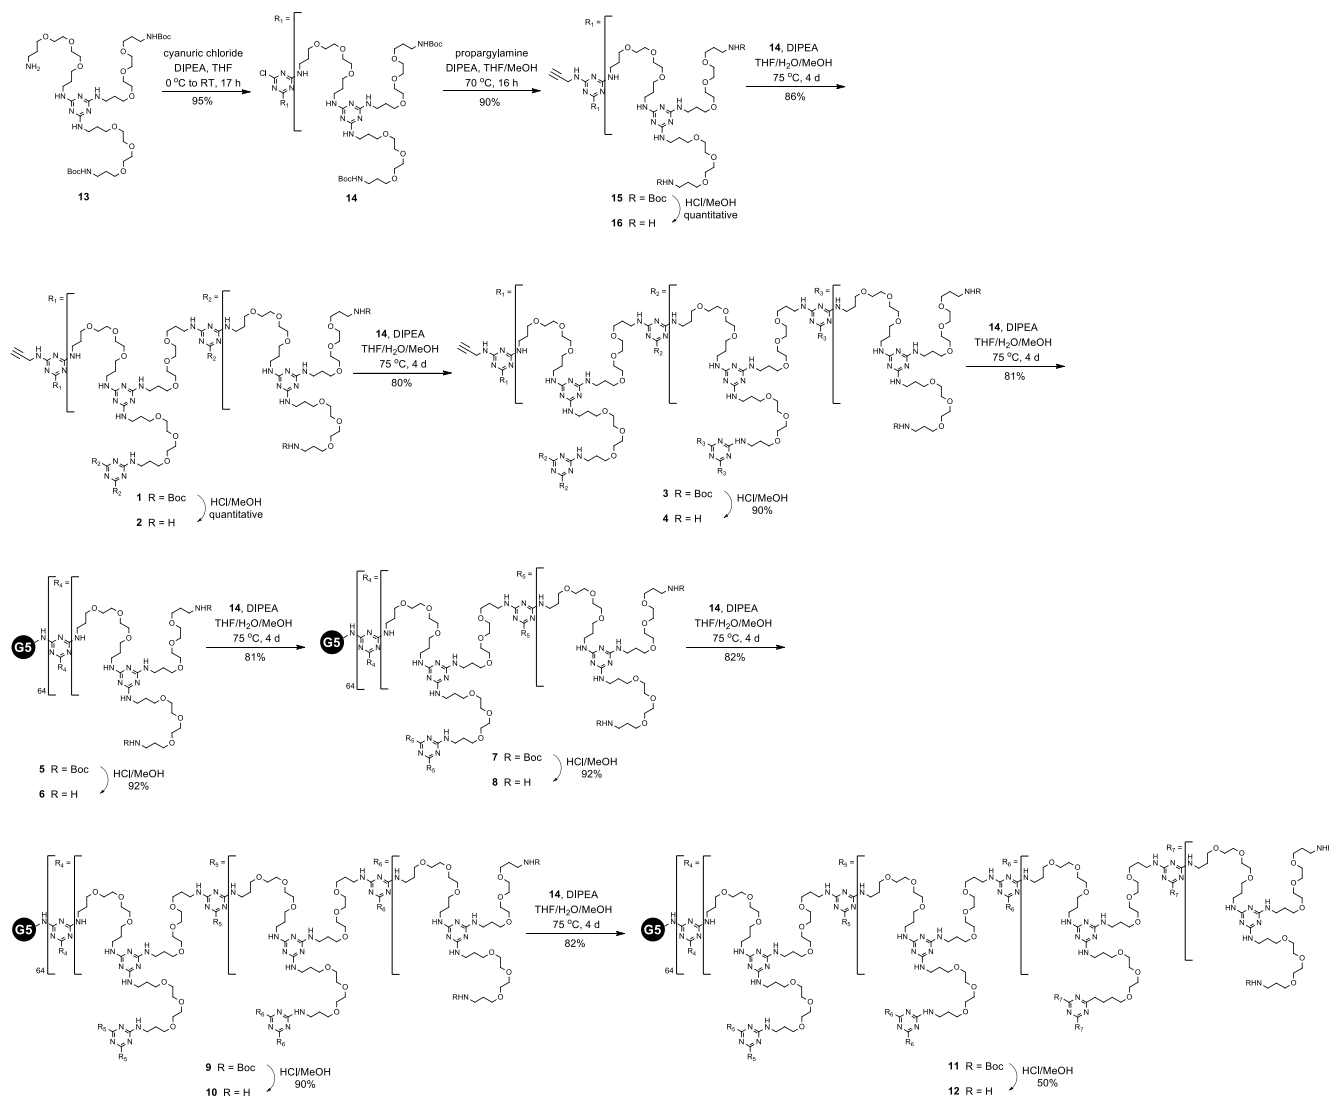

## Details of Synthetic Procedures

**Compound 1 (Boc-protected G3).** A solution of **14** (1.20 g, 0.61 mmol), **16** (0.12 g, 0.074 mmol), and DIPEA (0.30 mL, 1.71 mmol) in THF (3 mL), methanol (0.3 mL), and  $\text{H}_2\text{O}$  (0.3 mL) was stirred at  $75^\circ\text{C}$  in a capped vessel

for 4 d. The solution was evaporated under vacuum. The residue was dissolved in dichloromethane, washed with brine, dried over  $\text{MgSO}_4$ , filtered, and evaporated under vacuum. The crude product was purified by silica gel chromatography (from EA:DCM:MeOH = 6:6:1 to DCM:MeOH = 7:1) to give **1** (0.60 g, 86%) as a white wax.  $^1\text{H}$  NMR (300 MHz,  $\text{CDCl}_3$ )  $\delta$  4.05 (br, 2H,  $\text{HC}\equiv\text{CCH}_2$ ), 3.51-3.29 (m, 448H,  $\text{CH}_2\text{OCH}_2\text{CH}_2\text{OCH}_2\text{CH}_2\text{OCH}_2$ ,  $\text{C}_3\text{N}_3\text{-NHCH}_2\text{CH}_2\text{CH}_2\text{O}$ ), 3.08 (br m, 32H,  $\text{BocNHCH}_2$ ), 2.17 (br, 1H,  $\text{HC}\equiv\text{CCH}_2$ ), 1.69-1.60 (m, 120H,  $\text{OCH}_2\text{CH}_2\text{CH}_2$ ), 1.31 (s, 144H,  $\text{C}(\text{CH}_3)_3$ );  $^{13}\text{C}$  NMR (75 MHz,  $\text{CDCl}_3$ )  $\delta$  165.7 ( $\text{C}_3\text{N}_3$ ), 155.9 (CO), 81.1 (not found,  $\text{HC}\equiv\text{CCH}_2$ ), 78.6 ( $\text{C}(\text{CH}_3)_3$ ), 70.5 (not found,  $\text{HC}\equiv\text{CCH}_2$ ), 70.4 ( $\text{OCH}_2\text{CH}_2\text{O}$ ), 70.0 (two lines,  $\text{OCH}_2\text{CH}_2\text{O}$ ), 69.3 ( $\text{CH}_2\text{CH}_2\text{CH}_2\text{O}$ ), 69.1 ( $\text{CH}_2\text{CH}_2\text{CH}_2\text{O}$ ), 69.0 ( $\text{CH}_2\text{CH}_2\text{CH}_2\text{O}$ ), 38.3 ( $\text{CH}_2\text{CH}_2\text{CH}_2\text{O}$ ), 37.8 ( $\text{CH}_2\text{CH}_2\text{CH}_2\text{O}$ ), 30.1 (not found,  $\text{HC}\equiv\text{CCH}_2$ ), 29.5 ( $\text{NHCH}_2\text{CH}_2\text{CH}_2\text{O}$ ), 28.3 ( $\text{C}(\text{CH}_3)_3$ ); MS (ESI-TOF) calcd for  $\text{C}_{428}\text{H}_{808}\text{N}_{106}\text{O}_{122}$  9386.03, found 9395.31 (M + H) $^+$ .

**Compound 2 (deprotected G3).** A solution of **1** (0.27 g, 0.029 mmol) in concentrated HCl (2 mL) and methanol (4 mL) was stirred for 16 h at room temperature and then evaporated under vacuum. The residue was dissolved in chloroform, washed with 5 M NaOH (aq), dried over  $\text{MgSO}_4$ , filtered, and evaporated under vacuum to give **2** (0.22 g, quantitative) as a white wax.  $^1\text{H}$  NMR (300 MHz,  $\text{CDCl}_3$ )  $\delta$  4.12 (br, 2H,  $\text{HC}\equiv\text{CCH}_2$ ), 3.60-3.38 (m, 448H,  $\text{CH}_2\text{OCH}_2\text{CH}_2\text{OCH}_2\text{CH}_2\text{OCH}_2$ ,  $\text{C}_3\text{N}_3\text{-NHCH}_2\text{CH}_2\text{CH}_2\text{O}$ ), 2.78 (br, 32H,  $\text{OCH}_2\text{CH}_2\text{CH}_2\text{NH}_2$ ), 2.22 (br, 1H,  $\text{HC}\equiv\text{CCH}_2$ ), 1.78-1.69 (m, 120H,  $\text{OCH}_2\text{CH}_2\text{CH}_2$ );  $^{13}\text{C}$  NMR (75 MHz,  $\text{CDCl}_3$ )  $\delta$  166.1 ( $\text{C}_3\text{N}_3$ ), 81.1 (not found,  $\text{HC}\equiv\text{CCH}_2$ ), 70.6 ( $\text{OCH}_2\text{CH}_2\text{O}$ ), 70.5 ( $\text{HC}\equiv\text{CCH}_2$ ), 70.3 ( $\text{OCH}_2\text{CH}_2\text{O}$ ), 70.2 ( $\text{OCH}_2\text{CH}_2\text{O}$ ), 69.5 ( $\text{CH}_2\text{CH}_2\text{CH}_2\text{O}$ ), 69.4 ( $\text{CH}_2\text{CH}_2\text{CH}_2\text{O}$ ), 69.3 ( $\text{CH}_2\text{CH}_2\text{CH}_2\text{O}$ ), 39.6 ( $\text{CH}_2\text{CH}_2\text{CH}_2\text{O}$ ), 38.1 ( $\text{CH}_2\text{CH}_2\text{CH}_2\text{O}$ ), 32.9 ( $\text{OCH}_2\text{CH}_2\text{CH}_2\text{NH}_2$ ), 30.1 (not found,  $\text{HC}\equiv\text{CCH}_2$ ), 29.7 ( $\text{NHCH}_2\text{CH}_2\text{CH}_2\text{O}$ ); MS (ESI-TOF) calcd for  $\text{C}_{348}\text{H}_{680}\text{N}_{106}\text{O}_{90}$  7785.19, found 7789.62 (M + H) $^+$ .

**Compound 3 (Boc-protected G5).** A solution of **14** (1.0 g, 0.50 mmol), **2** (0.11 g, 0.014 mmol), and DIPEA (0.30 mL, 1.71 mmol) in THF (5 mL), methanol (0.5 mL), and  $\text{H}_2\text{O}$  (0.5 mL) was stirred at 75  $^\circ\text{C}$  in a capped vessel for 4 d. The solution was evaporated under vacuum. The residue was dissolved in dichloromethane, washed with brine, dried over  $\text{MgSO}_4$ , filtered, and evaporated under vacuum. The crude product was dissolved in dichloromethane and precipitated by adding diethyl ether. The precipitation step was repeated until macromonomer **14** was completely removed, which was monitored by thin layer chromatography (DCM:MeOH = 14:1). The pure product **3** (0.44 g, 80%) was obtained as a white wax.  $^1\text{H}$  NMR (300 MHz,  $\text{CDCl}_3$ )  $\delta$  4.05 (not found, 2H,  $\text{HC}\equiv\text{CCH}_2$ ), 3.53-3.32 (m, 1888H,  $\text{CH}_2\text{OCH}_2\text{CH}_2\text{OCH}_2\text{CH}_2\text{OCH}_2$ ,  $\text{C}_3\text{N}_3\text{-NHCH}_2\text{CH}_2\text{CH}_2\text{O}$ ), 3.11 (br m, 128H,  $\text{BocNHCH}_2$ ), 2.17 (not found, 1H,  $\text{HC}\equiv\text{CCH}_2$ ), 1.72-1.63 (m, 504H,  $\text{OCH}_2\text{CH}_2\text{CH}_2$ ), 1.33 (s, 576H,  $\text{C}(\text{CH}_3)_3$ );  $^{13}\text{C}$  NMR (75 MHz,  $\text{CDCl}_3$ )  $\delta$  165.1 (br,  $\text{C}_3\text{N}_3$ ), 156.0 (CO), 81.1 (not found,  $\text{HC}\equiv\text{CCH}_2$ ), 78.7 ( $\text{C}(\text{CH}_3)_3$ ), 70.5 (not found,  $\text{HC}\equiv\text{CCH}_2$ ), 70.4 ( $\text{OCH}_2\text{CH}_2\text{O}$ ), 70.1 (three lines,  $\text{OCH}_2\text{CH}_2\text{O}$ ), 69.4 ( $\text{CH}_2\text{CH}_2\text{CH}_2\text{O}$ ), 69.1 ( $\text{CH}_2\text{CH}_2\text{CH}_2\text{O}$ ), 38.4 ( $\text{CH}_2\text{CH}_2\text{CH}_2\text{O}$ ), 38.0 ( $\text{CH}_2\text{CH}_2\text{CH}_2\text{O}$ ), 30.1 (not found,  $\text{HC}\equiv\text{CCH}_2$ ), 29.4 ( $\text{NHCH}_2\text{CH}_2\text{CH}_2\text{O}$ ), 28.4 ( $\text{C}(\text{CH}_3)_3$ ); MS (ESI-TOF) calcd for  $\text{C}_{1772}\text{H}_{3352}\text{N}_{442}\text{O}_{506}$  38925.0, found 38952.4 (M + H) $^+$ .

**Compound 4 (deprotected G5).** A solution of **3** (0.40 g, 0.0103 mmol) in concentrated HCl (3 mL) and methanol (6 mL) was stirred for 16 h at room temperature and then evaporated under vacuum. The residue was dissolved in chloroform, washed with 5 M NaOH (aq), dried over MgSO<sub>4</sub>, filtered, and evaporated under vacuum to give **4** (0.30 g, 90%) as a white wax. <sup>1</sup>H NMR (300 MHz, CDCl<sub>3</sub>) δ 4.12 (not found, 2H, HC≡CCH<sub>2</sub>), 3.55-3.34 (m, 1888H, CH<sub>2</sub>OCH<sub>2</sub>CH<sub>2</sub>OCH<sub>2</sub>CH<sub>2</sub>OCH<sub>2</sub>, C<sub>3</sub>N<sub>3</sub>-NHCH<sub>2</sub>CH<sub>2</sub>CH<sub>2</sub>O), 2.71 (br, 128H, OCH<sub>2</sub>CH<sub>2</sub>CH<sub>2</sub>NH<sub>2</sub>), 2.22 (not found, 1H, HC≡CCH<sub>2</sub>), 1.75-1.62 (m, 504H, OCH<sub>2</sub>CH<sub>2</sub>CH<sub>2</sub>); <sup>13</sup>C NMR (75 MHz, CDCl<sub>3</sub>) δ 166.0 (C<sub>3</sub>N<sub>3</sub>), 81.1 (not found, HC≡CCH<sub>2</sub>), 70.5 (HC≡CCH<sub>2</sub>, OCH<sub>2</sub>CH<sub>2</sub>O), 70.2 (OCH<sub>2</sub>CH<sub>2</sub>O), 69.4 (CH<sub>2</sub>CH<sub>2</sub>CH<sub>2</sub>O), 69.2 (CH<sub>2</sub>CH<sub>2</sub>CH<sub>2</sub>O), 39.5 (CH<sub>2</sub>CH<sub>2</sub>CH<sub>2</sub>O), 38.0 (CH<sub>2</sub>CH<sub>2</sub>CH<sub>2</sub>O), 33.3 (OCH<sub>2</sub>CH<sub>2</sub>CH<sub>2</sub>NH<sub>2</sub>), 30.1 (not found, HC≡CCH<sub>2</sub>), 29.6 (NHCH<sub>2</sub>CH<sub>2</sub>CH<sub>2</sub>O); MS (ESI-TOF) calcd for C<sub>1452</sub>H<sub>2840</sub>N<sub>442</sub>O<sub>378</sub> 32521.7, not found.

**Compound 5 (Boc-protected G7).** A solution of **14** (1.0 g, 0.504 mmol), **4** (0.10 g, 3.07 μmol), and DIPEA (0.30 mL, 1.71 mmol) in THF (5 mL), methanol (0.5 mL), and H<sub>2</sub>O (0.5 mL) was stirred at 75 °C in a capped vessel for 4 d. The solution was evaporated under vacuum. The residue was dissolved in dichloromethane, washed with brine, dried over MgSO<sub>4</sub>, filtered, and evaporated under vacuum. The crude product was dissolved in dichloromethane and precipitated by adding diethyl ether. The precipitation step was repeated until macromonomer **14** was completely removed, which was monitored by thin layer chromatography (DCM:MeOH = 14:1). The pure product **5** (0.39 g, 81%) was obtained as a white wax. <sup>1</sup>H NMR (300 MHz, CDCl<sub>3</sub>) δ 4.05 (not found, 2H, HC≡CCH<sub>2</sub>), 3.58-3.36 (m, 7648H, CH<sub>2</sub>OCH<sub>2</sub>CH<sub>2</sub>OCH<sub>2</sub>CH<sub>2</sub>OCH<sub>2</sub>, C<sub>3</sub>N<sub>3</sub>-NHCH<sub>2</sub>CH<sub>2</sub>CH<sub>2</sub>O), 3.16 (br m, 512H, BocNHCH<sub>2</sub>), 2.17 (not found, 1H, HC≡CCH<sub>2</sub>), 1.76-1.67 (m, 2040H, OCH<sub>2</sub>CH<sub>2</sub>CH<sub>2</sub>), 1.37 (s, 2304H, C(CH<sub>3</sub>)<sub>3</sub>); <sup>13</sup>C NMR (75 MHz, CDCl<sub>3</sub>) δ 165.9 (C<sub>3</sub>N<sub>3</sub>), 156.1 (CO), 81.1 (not found, HC≡CCH<sub>2</sub>), 78.8 (C(CH<sub>3</sub>)<sub>3</sub>), 70.6 (OCH<sub>2</sub>CH<sub>2</sub>O), 70.5 (not found, HC≡CCH<sub>2</sub>), 70.3 (OCH<sub>2</sub>CH<sub>2</sub>O), 70.2 (two lines, OCH<sub>2</sub>CH<sub>2</sub>O), 69.5 (CH<sub>2</sub>CH<sub>2</sub>CH<sub>2</sub>O), 69.3 (CH<sub>2</sub>CH<sub>2</sub>CH<sub>2</sub>O), 69.2 (CH<sub>2</sub>CH<sub>2</sub>CH<sub>2</sub>O), 38.5 (CH<sub>2</sub>CH<sub>2</sub>CH<sub>2</sub>O), 38.1 (CH<sub>2</sub>CH<sub>2</sub>CH<sub>2</sub>O), 30.1 (not found, HC≡CCH<sub>2</sub>), 29.6 (NHCH<sub>2</sub>CH<sub>2</sub>CH<sub>2</sub>O), 28.5 (C(CH<sub>3</sub>)<sub>3</sub>); MS (ESI-TOF) calcd for C<sub>7148</sub>H<sub>13528</sub>N<sub>1786</sub>O<sub>2042</sub> 157081.0, not found.

**Compound 6 (deprotected G7).** A solution of **5** (0.34 g, 2.16 μmol) in concentrated HCl (4 mL) and methanol (8 mL) was stirred for 16 h at room temperature and then evaporated under vacuum. The residue was dissolved in chloroform, washed with 5 M NaOH (aq), dried over MgSO<sub>4</sub>, filtered, and evaporated under vacuum to give **6** (0.26 g, 92%) as a white wax. <sup>1</sup>H NMR (300 MHz, CDCl<sub>3</sub>) δ 4.12 (not found, 2H, HC≡CCH<sub>2</sub>), 3.57-3.34 (m, 7648H, CH<sub>2</sub>OCH<sub>2</sub>CH<sub>2</sub>OCH<sub>2</sub>CH<sub>2</sub>OCH<sub>2</sub>, C<sub>3</sub>N<sub>3</sub>-NHCH<sub>2</sub>CH<sub>2</sub>CH<sub>2</sub>O), 2.72 (t, *J* = 6.6, 512H, OCH<sub>2</sub>CH<sub>2</sub>CH<sub>2</sub>NH<sub>2</sub>), 2.22 (not found, 1H, HC≡CCH<sub>2</sub>), 1.75-1.63 (m, 2040H, OCH<sub>2</sub>CH<sub>2</sub>CH<sub>2</sub>); <sup>13</sup>C NMR (75 MHz, CDCl<sub>3</sub>) δ 166.1 (C<sub>3</sub>N<sub>3</sub>), 81.1 (not found, HC≡CCH<sub>2</sub>), 70.6 (OCH<sub>2</sub>CH<sub>2</sub>O), 70.5 (HC≡CCH<sub>2</sub>, OCH<sub>2</sub>CH<sub>2</sub>O), 70.2 (OCH<sub>2</sub>CH<sub>2</sub>O), 70.1 (OCH<sub>2</sub>CH<sub>2</sub>O), 69.4 (CH<sub>2</sub>CH<sub>2</sub>CH<sub>2</sub>O), 69.3 (CH<sub>2</sub>CH<sub>2</sub>CH<sub>2</sub>O), 69.2 (CH<sub>2</sub>CH<sub>2</sub>CH<sub>2</sub>O), 39.5 (CH<sub>2</sub>CH<sub>2</sub>CH<sub>2</sub>O), 38.0 (CH<sub>2</sub>CH<sub>2</sub>CH<sub>2</sub>O), 33.4 (OCH<sub>2</sub>CH<sub>2</sub>CH<sub>2</sub>NH<sub>2</sub>), 30.1 (not found, HC≡CCH<sub>2</sub>), 29.6 (NHCH<sub>2</sub>CH<sub>2</sub>CH<sub>2</sub>O); MS (ESI-TOF) calcd for C<sub>5868</sub>H<sub>11480</sub>N<sub>1786</sub>O<sub>1530</sub> 131467.5, not found.

**Compound 7 (Boc-protected G9).** A solution of **14** (1.0 g, 0.504 mmol), **6** (0.10 g, 0.76  $\mu\text{mol}$ ), and DIPEA (0.30 mL, 1.71 mmol) in THF (5 mL), methanol (0.5 mL), and H<sub>2</sub>O (0.5 mL) was stirred at 75 °C in a capped vessel for 4 d. The solution was evaporated under vacuum. The residue was dissolved in dichloromethane, washed with brine, dried over MgSO<sub>4</sub>, filtered, and evaporated under vacuum. The crude product was dissolved in dichloromethane and precipitated by adding diethyl ether. The precipitation step was repeated until macromonomer **14** was completely removed, which was monitored by thin layer chromatography (DCM:MeOH = 14:1). The pure product **7** (0.39 g, 81%) was obtained as a white wax. <sup>1</sup>H NMR (300 MHz, CDCl<sub>3</sub>)  $\delta$  4.05 (not found, 2H, HC $\equiv$ CCH<sub>2</sub>), 3.58-3.36 (m, 30688H, CH<sub>2</sub>OCH<sub>2</sub>CH<sub>2</sub>OCH<sub>2</sub>CH<sub>2</sub>OCH<sub>2</sub>, C<sub>3</sub>N<sub>3</sub>-NHCH<sub>2</sub>CH<sub>2</sub>CH<sub>2</sub>O), 3.16 (br m, 2048H, BocNHCH<sub>2</sub>), 2.17 (not found, 1H, HC $\equiv$ CCH<sub>2</sub>), 1.76-1.67 (m, 8184H, OCH<sub>2</sub>CH<sub>2</sub>CH<sub>2</sub>), 1.38 (s, 9216H, C(CH<sub>3</sub>)<sub>3</sub>); <sup>13</sup>C NMR (75 MHz, CDCl<sub>3</sub>)  $\delta$  165.9 (C<sub>3</sub>N<sub>3</sub>), 156.1 (CO), 81.1 (not found, HC $\equiv$ CCH<sub>2</sub>), 78.8 (C(CH<sub>3</sub>)<sub>3</sub>), 70.6 (OCH<sub>2</sub>CH<sub>2</sub>O), 70.5 (not found, HC $\equiv$ CCH<sub>2</sub>), 70.3 (OCH<sub>2</sub>CH<sub>2</sub>O), 70.2 (OCH<sub>2</sub>CH<sub>2</sub>O), 69.5 (CH<sub>2</sub>CH<sub>2</sub>CH<sub>2</sub>O), 69.3 (CH<sub>2</sub>CH<sub>2</sub>CH<sub>2</sub>O), 69.2 (CH<sub>2</sub>CH<sub>2</sub>CH<sub>2</sub>O), 38.5 (CH<sub>2</sub>CH<sub>2</sub>CH<sub>2</sub>O), 38.1 (CH<sub>2</sub>CH<sub>2</sub>CH<sub>2</sub>O), 30.1 (not found, HC $\equiv$ CCH<sub>2</sub>), 29.6 (NHCH<sub>2</sub>CH<sub>2</sub>CH<sub>2</sub>O), 28.5 (C(CH<sub>3</sub>)<sub>3</sub>); MS (ESI-TOF) calcd for C<sub>28652</sub>H<sub>54232</sub>N<sub>7162</sub>O<sub>8186</sub> 629704.8, not found.

**Compound 8 (deprotected G9).** A solution of **7** (0.33 g, 0.524  $\mu\text{mol}$ ) in concentrated HCl (4 mL) and methanol (8 mL) was stirred for 16 h at room temperature and then evaporated under vacuum. The residue was dissolved in chloroform, washed with 5 M NaOH (aq), dried over MgSO<sub>4</sub>, filtered, and evaporated under vacuum to give **8** (0.255 g, 92%) as a white wax. <sup>1</sup>H NMR (300 MHz, CDCl<sub>3</sub>)  $\delta$  4.12 (not found, 2H, HC $\equiv$ CCH<sub>2</sub>), 3.58-3.36 (m, 30688H, CH<sub>2</sub>OCH<sub>2</sub>CH<sub>2</sub>OCH<sub>2</sub>CH<sub>2</sub>OCH<sub>2</sub>, C<sub>3</sub>N<sub>3</sub>-NHCH<sub>2</sub>CH<sub>2</sub>CH<sub>2</sub>O), 2.73 (t, *J* = 6.6, 2048H, OCH<sub>2</sub>CH<sub>2</sub>CH<sub>2</sub>NH<sub>2</sub>), 2.22 (not found, 1H, HC $\equiv$ CCH<sub>2</sub>), 1.76-1.65 (m, 8184H, OCH<sub>2</sub>CH<sub>2</sub>CH<sub>2</sub>); <sup>13</sup>C NMR (75 MHz, CDCl<sub>3</sub>)  $\delta$  166.3 (C<sub>3</sub>N<sub>3</sub>), 81.1 (not found, HC $\equiv$ CCH<sub>2</sub>), 70.6 (two lines, OCH<sub>2</sub>CH<sub>2</sub>O), 70.5 (not found, HC $\equiv$ CCH<sub>2</sub>), 70.2 (two lines, OCH<sub>2</sub>CH<sub>2</sub>O), 69.4 (CH<sub>2</sub>CH<sub>2</sub>CH<sub>2</sub>O), 69.3 (two lines, CH<sub>2</sub>CH<sub>2</sub>CH<sub>2</sub>O), 39.6 (CH<sub>2</sub>CH<sub>2</sub>CH<sub>2</sub>O), 38.1 (CH<sub>2</sub>CH<sub>2</sub>CH<sub>2</sub>O), 33.3 (OCH<sub>2</sub>CH<sub>2</sub>CH<sub>2</sub>NH<sub>2</sub>), 30.1 (not found, HC $\equiv$ CCH<sub>2</sub>), 29.7 (NHCH<sub>2</sub>CH<sub>2</sub>CH<sub>2</sub>O); MS (ESI-TOF) calcd for C<sub>23532</sub>H<sub>46040</sub>N<sub>7162</sub>O<sub>6138</sub> 527251.1, not found.

**Compound 9 (Boc-protected G11).** A solution of **14** (1.0 g, 0.504 mmol), **8** (0.10 g, 0.19  $\mu\text{mol}$ ), and DIPEA (0.30 mL, 1.71 mmol) in THF (5 mL), methanol (0.5 mL), and H<sub>2</sub>O (0.5 mL) was stirred at 75 °C in a capped vessel for 4 d. The solution was evaporated under vacuum. The residue was dissolved in dichloromethane, washed with brine, dried over MgSO<sub>4</sub>, filtered, and evaporated under vacuum. The crude product was dissolved in dichloromethane and precipitated by adding diethyl ether. The precipitation step was repeated until macromonomer **14** was completely removed, which was monitored by thin layer chromatography (DCM:MeOH = 14:1). The pure product **9** (0.39 g, 82%) was obtained as a white wax. <sup>1</sup>H NMR (300 MHz, CDCl<sub>3</sub>)  $\delta$  4.05 (not found, 2H, HC $\equiv$ CCH<sub>2</sub>), 3.61-3.39 (m, 122848H, CH<sub>2</sub>OCH<sub>2</sub>CH<sub>2</sub>OCH<sub>2</sub>CH<sub>2</sub>OCH<sub>2</sub>, C<sub>3</sub>N<sub>3</sub>-NHCH<sub>2</sub>CH<sub>2</sub>CH<sub>2</sub>O), 3.19 (br m, 8192H, BocNHCH<sub>2</sub>), 2.17 (not found, 1H, HC $\equiv$ CCH<sub>2</sub>), 1.80-1.71 (m, 32760H, OCH<sub>2</sub>CH<sub>2</sub>CH<sub>2</sub>), 1.41 (s, 36864H,

$\text{C}(\text{CH}_3)_3$ );  $^{13}\text{C}$  NMR (75 MHz,  $\text{CDCl}_3$ )  $\delta$  166.0 ( $\text{C}_3\text{N}_3$ ), 156.1 ( $\text{CO}$ ), 81.1 (not found,  $\text{HC}\equiv\text{CCH}_2$ ), 78.9 ( $\text{C}(\text{CH}_3)_3$ ), 70.6 ( $\text{OCH}_2\text{CH}_2\text{O}$ ), 70.5 (not found,  $\text{HC}\equiv\text{CCH}_2$ ), 70.3 (two lines,  $\text{OCH}_2\text{CH}_2\text{O}$ ), 70.2 ( $\text{OCH}_2\text{CH}_2\text{O}$ ), 69.6 ( $\text{CH}_2\text{CH}_2\text{CH}_2\text{O}$ ), 69.3 (two lines,  $\text{CH}_2\text{CH}_2\text{CH}_2\text{O}$ ), 38.5 ( $\text{CH}_2\text{CH}_2\text{CH}_2\text{O}$ ), 38.1 ( $\text{CH}_2\text{CH}_2\text{CH}_2\text{O}$ ), 30.1 (not found,  $\text{HC}\equiv\text{CCH}_2$ ), 29.7 ( $\text{NHCH}_2\text{CH}_2\text{CH}_2\text{O}$ ), 28.5 ( $\text{C}(\text{CH}_3)_3$ ); MS (ESI-TOF) calcd for  $\text{C}_{114668}\text{H}_{217048}\text{N}_{28666}\text{O}_{32762}$  2520199.9, not found.

**Compound 10 (deprotected G11).** A solution of **9** (0.33 g, 0.131  $\mu\text{mol}$ ) in concentrated HCl (4 mL) and methanol (8 mL) was stirred for 16 h at room temperature and then evaporated under vacuum. The residue was dissolved in chloroform, washed with 5 M NaOH (aq), dried over  $\text{MgSO}_4$ , filtered, and evaporated under vacuum to give **10** (0.25 g, 90%) as a white wax.  $^1\text{H}$  NMR (300 MHz,  $\text{CDCl}_3$ )  $\delta$  4.12 (not found, 2H,  $\text{HC}\equiv\text{CCH}_2$ ), 3.60-3.38 (m, 122848H,  $\text{CH}_2\text{OCH}_2\text{CH}_2\text{OCH}_2\text{CH}_2\text{OCH}_2$ ,  $\text{C}_3\text{N}_3\text{-NHCH}_2\text{CH}_2\text{CH}_2\text{O}$ ), 2.76 (t,  $J = 6.6$ , 8192H,  $\text{OCH}_2\text{CH}_2\text{CH}_2\text{NH}_2$ ), 2.22 (not found, 1H,  $\text{HC}\equiv\text{CCH}_2$ ), 1.78-1.67 (m, 32760H,  $\text{OCH}_2\text{CH}_2\text{CH}_2$ );  $^{13}\text{C}$  NMR (75 MHz,  $\text{CDCl}_3$ )  $\delta$  166.1 ( $\text{C}_3\text{N}_3$ ), 81.1 (not found,  $\text{HC}\equiv\text{CCH}_2$ ), 70.7 ( $\text{OCH}_2\text{CH}_2\text{O}$ ), 70.5 (not found,  $\text{HC}\equiv\text{CCH}_2$ ), 70.3 (two lines,  $\text{OCH}_2\text{CH}_2\text{O}$ ), 69.5 ( $\text{CH}_2\text{CH}_2\text{CH}_2\text{O}$ ), 69.3 ( $\text{CH}_2\text{CH}_2\text{CH}_2\text{O}$ ), 39.7 ( $\text{CH}_2\text{CH}_2\text{CH}_2\text{O}$ ), 38.1 ( $\text{CH}_2\text{CH}_2\text{CH}_2\text{O}$ ), 33.5 ( $\text{OCH}_2\text{CH}_2\text{CH}_2\text{NH}_2$ ), 30.1 (not found,  $\text{HC}\equiv\text{CCH}_2$ ), 29.8 ( $\text{NHCH}_2\text{CH}_2\text{CH}_2\text{O}$ ); MS (ESI-TOF) calcd for  $\text{C}_{94188}\text{H}_{184280}\text{N}_{28666}\text{O}_{24570}$  2110385.2, not found.

**Compound 11 (Boc-protected G13).** A solution of **14** (0.70 g, 0.353 mmol), **10** (0.070 g, 0.033  $\mu\text{mol}$ ), and DIPEA (0.20 mL, 1.14 mmol) in THF (4 mL), methanol (0.4 mL), and  $\text{H}_2\text{O}$  (0.4 mL) was stirred at 75  $^\circ\text{C}$  in a capped vessel for 4 d. The solution was evaporated under vacuum. The residue was dissolved in dichloromethane, washed with brine, dried over  $\text{MgSO}_4$ , filtered, and evaporated under vacuum. The crude product was dissolved in dichloromethane and precipitated by adding diethyl ether. The precipitation step was repeated until macromonomer **14** was completely removed, which was monitored by thin layer chromatography (DCM:MeOH = 14:1). The pure product **11** (0.275 g, 82%) was obtained as a white wax.  $^1\text{H}$  NMR (300 MHz,  $\text{CDCl}_3$ )  $\delta$  4.05 (not found, 2H,  $\text{HC}\equiv\text{CCH}_2$ ), 3.59-3.39 (m, 491488H,  $\text{CH}_2\text{OCH}_2\text{CH}_2\text{OCH}_2\text{CH}_2\text{OCH}_2$ ,  $\text{C}_3\text{N}_3\text{-NHCH}_2\text{CH}_2\text{CH}_2\text{O}$ ), 3.17 (br, 32768H, BocNHCH<sub>2</sub>), 2.17 (not found, 1H,  $\text{HC}\equiv\text{CCH}_2$ ), 1.78 (br, 131064H,  $\text{OCH}_2\text{CH}_2\text{CH}_2$ ), 1.39 (s, 147456H,  $\text{C}(\text{CH}_3)_3$ );  $^{13}\text{C}$  NMR (75 MHz,  $\text{CDCl}_3$ )  $\delta$  165.4 (br,  $\text{C}_3\text{N}_3$ ), 156.1 ( $\text{CO}$ ), 81.1 (not found,  $\text{HC}\equiv\text{CCH}_2$ ), 78.9 ( $\text{C}(\text{CH}_3)_3$ ), 70.6 ( $\text{OCH}_2\text{CH}_2\text{O}$ ), 70.5 (not found,  $\text{HC}\equiv\text{CCH}_2$ ), 70.3 ( $\text{OCH}_2\text{CH}_2\text{O}$ ), 70.2 ( $\text{OCH}_2\text{CH}_2\text{O}$ ), 69.6 ( $\text{CH}_2\text{CH}_2\text{CH}_2\text{O}$ ), 69.2 ( $\text{CH}_2\text{CH}_2\text{CH}_2\text{O}$ ), 38.5 ( $\text{CH}_2\text{CH}_2\text{CH}_2\text{O}$ ), 38.2 ( $\text{CH}_2\text{CH}_2\text{CH}_2\text{O}$ ), 30.1 (not found,  $\text{HC}\equiv\text{CCH}_2$ ), 29.6 ( $\text{NHCH}_2\text{CH}_2\text{CH}_2\text{O}$ ), 28.5 ( $\text{C}(\text{CH}_3)_3$ ); MS (ESI-TOF) calcd for  $\text{C}_{458732}\text{H}_{868312}\text{N}_{114682}\text{O}_{131066}$  10082180.6, not found.

**Compound 12 (deprotected G13).** A solution of **11** (0.12 g, 0.0119  $\mu\text{mol}$ ) in concentrated HCl (3 mL) and methanol (6 mL) was stirred for 16 h at room temperature and then evaporated under vacuum. The residue was dissolved in chloroform, washed with 5 M NaOH (aq), dried over  $\text{MgSO}_4$ , filtered, and evaporated under vacuum to give **12** (50 mg, 50%) as a white wax.  $^1\text{H}$  NMR (300 MHz,  $\text{CDCl}_3$ )  $\delta$  4.12 (not found, 2H,  $\text{HC}\equiv\text{CCH}_2$ ), 3.62-3.40 (m, 491488H,  $\text{CH}_2\text{OCH}_2\text{CH}_2\text{OCH}_2\text{CH}_2\text{OCH}_2$ ,  $\text{C}_3\text{N}_3\text{-NHCH}_2\text{CH}_2\text{CH}_2\text{O}$ ), 2.78 (br, 32768H,  $\text{OCH}_2\text{CH}_2\text{CH}_2\text{NH}_2$ ),

2.22 (not found, 1H, HC≡CCH<sub>2</sub>), 1.80-1.71 (br m, 131064H, OCH<sub>2</sub>CH<sub>2</sub>CH<sub>2</sub>); <sup>13</sup>C NMR (75 MHz, CDCl<sub>3</sub>) δ 166.2 (C<sub>3</sub>N<sub>3</sub>), 81.1 (not found, HC≡CCH<sub>2</sub>), 70.8 (OCH<sub>2</sub>CH<sub>2</sub>O), 70.7 (OCH<sub>2</sub>CH<sub>2</sub>O), 70.5 (not found, HC≡CCH<sub>2</sub>), 70.4 (OCH<sub>2</sub>CH<sub>2</sub>O), 70.3 (OCH<sub>2</sub>CH<sub>2</sub>O), 69.6 (CH<sub>2</sub>CH<sub>2</sub>CH<sub>2</sub>O), 69.4 (two lines, CH<sub>2</sub>CH<sub>2</sub>CH<sub>2</sub>O), 39.7 (CH<sub>2</sub>CH<sub>2</sub>CH<sub>2</sub>O), 38.2 (CH<sub>2</sub>CH<sub>2</sub>CH<sub>2</sub>O), 33.5 (OCH<sub>2</sub>CH<sub>2</sub>CH<sub>2</sub>NH<sub>2</sub>), 30.1 (not found, HC≡CCH<sub>2</sub>), 29.8 (NHCH<sub>2</sub>CH<sub>2</sub>CH<sub>2</sub>O); MS (ESI-TOF) calcd for C<sub>37</sub>H<sub>68</sub>N<sub>12</sub>O<sub>9</sub> 844.2921, not found.

**Compound 13.** Cyanuric chloride (1.70 g, 9.22 mmol) was added to an ice-bath cooled solution of *N*-Boc-4,7,10-trioxa-1,13-tridecanediamine (5.80 g, 18.10 mmol) and DIPEA (4.0 mL, 22.8 mmol) in THF (40 mL). The solution was stirred for 1 h at 0 °C, warmed to room temperature, and then stirred for 16 h. After addition of a solution of 4,7,10-trioxa-1,13-tridecanediamine (14.0 g, 63.5 mmol) and DIPEA (3.0 mL, 17.1 mmol) in methanol (10 mL), the reaction solution was stirred for an additional 16 h at 70 °C and evaporated under vacuum. The residue was dissolved in dichloromethane, washed with brine, dried over MgSO<sub>4</sub>, filtered, and evaporated under vacuum. The crude product was purified by silica gel chromatography (DCM:MeOH = 10:1 with 1% NH<sub>4</sub>OH) to give **13** (7.6 g, 88% ) as a clear oil. <sup>1</sup>H NMR (300 MHz, CDCl<sub>3</sub>) δ 3.67-3.34 (m, 42H, CH<sub>2</sub>OCH<sub>2</sub>CH<sub>2</sub>OCH<sub>2</sub>CH<sub>2</sub>OCH<sub>2</sub>, C<sub>3</sub>N<sub>3</sub>-NHCH<sub>2</sub>CH<sub>2</sub>CH<sub>2</sub>O), 3.17 (m, 4H, BocNHCH<sub>2</sub>), 2.79 (t, *J* = 6.6, 2H, OCH<sub>2</sub>CH<sub>2</sub>CH<sub>2</sub>NH<sub>2</sub>), 1.83-1.67 (m, 12H, OCH<sub>2</sub>CH<sub>2</sub>CH<sub>2</sub>), 1.39 (s, 18H, C(CH<sub>3</sub>)<sub>3</sub>); <sup>13</sup>C NMR (75 MHz, CDCl<sub>3</sub>) δ 166.0 (C<sub>3</sub>N<sub>3</sub>), 156.2 (CO), 78.9 (C(CH<sub>3</sub>)<sub>3</sub>), 70.6 (OCH<sub>2</sub>CH<sub>2</sub>O), 70.3 (OCH<sub>2</sub>CH<sub>2</sub>O), 70.2 (two lines, OCH<sub>2</sub>CH<sub>2</sub>O), 69.6 (CH<sub>2</sub>CH<sub>2</sub>CH<sub>2</sub>O), 69.4 (CH<sub>2</sub>CH<sub>2</sub>CH<sub>2</sub>O), 39.6 (CH<sub>2</sub>CH<sub>2</sub>CH<sub>2</sub>O), 38.5 (CH<sub>2</sub>CH<sub>2</sub>CH<sub>2</sub>O), 38.2 (CH<sub>2</sub>CH<sub>2</sub>CH<sub>2</sub>O), 32.6 (OCH<sub>2</sub>CH<sub>2</sub>CH<sub>2</sub>NH<sub>2</sub>), 29.7 (NHCH<sub>2</sub>CH<sub>2</sub>CH<sub>2</sub>O), 28.5 (C(CH<sub>3</sub>)<sub>3</sub>); MS (ESI-TOF) calcd for C<sub>43</sub>H<sub>85</sub>N<sub>9</sub>O<sub>13</sub> 935.6267, found 936.6595 (M + H)<sup>+</sup>.

**Compound 14 (macromonomer).** Cyanuric chloride (0.46 g, 2.49 mmol) was added to an ice-bath cooled solution of **13** (4.70 g, 5.02 mmol) and DIPEA (2.0 mL, 11.4 mmol) in THF (40 mL). The solution was stirred for 1 h at 0 °C, warmed to room temperature, and then stirred for an additional 16 h. After concentration under vacuum, the residue was dissolved in dichloromethane, washed with brine, dried over MgSO<sub>4</sub>, filtered, and evaporated under vacuum. The crude product was purified by silica gel chromatography (DCM:MeOH = 14:1) to give **14** (4.68 g, 95% ) as a clear oil. <sup>1</sup>H NMR (300 MHz, CDCl<sub>3</sub>) δ 3.64-3.41 (m, 88H, CH<sub>2</sub>OCH<sub>2</sub>CH<sub>2</sub>OCH<sub>2</sub>CH<sub>2</sub>OCH<sub>2</sub>, C<sub>3</sub>N<sub>3</sub>-NHCH<sub>2</sub>CH<sub>2</sub>CH<sub>2</sub>O), 3.20 (br m, 8H, BocNHCH<sub>2</sub>), 1.83-1.70 (m, 24H, OCH<sub>2</sub>CH<sub>2</sub>CH<sub>2</sub>), 1.42 (s, 36H, C(CH<sub>3</sub>)<sub>3</sub>); <sup>13</sup>C NMR (75 MHz, CDCl<sub>3</sub>) δ 165.9 (C<sub>3</sub>N<sub>3</sub>), 165.6 (C<sub>3</sub>N<sub>3</sub>), 156.1 (CO), 78.8 (C(CH<sub>3</sub>)<sub>3</sub>), 70.5 (OCH<sub>2</sub>CH<sub>2</sub>O), 70.2 (two lines, OCH<sub>2</sub>CH<sub>2</sub>O), 69.5 (CH<sub>2</sub>CH<sub>2</sub>CH<sub>2</sub>O), 69.3 (CH<sub>2</sub>CH<sub>2</sub>CH<sub>2</sub>O), 38.4 (CH<sub>2</sub>CH<sub>2</sub>CH<sub>2</sub>O), 38.1 (CH<sub>2</sub>CH<sub>2</sub>CH<sub>2</sub>O), 29.6 (NHCH<sub>2</sub>CH<sub>2</sub>CH<sub>2</sub>O), 28.4 (C(CH<sub>3</sub>)<sub>3</sub>); MS (ESI-TOF) calcd for C<sub>89</sub>H<sub>168</sub>ClN<sub>21</sub>O<sub>26</sub> 1982.2158, found 1983.1606 (M + H)<sup>+</sup>.

**Compound 15 (Boc-protected G1).** A solution of propargylamine (0.10 g, 1.82 mmol), **14** (0.20 g, 0.10 mmol), and DIPEA (0.20 mL, 1.14 mmol) in THF (1 mL) and methanol (0.1 mL) was stirred at 70 °C in a capped vessel for 16 h. The solution was evaporated under vacuum. The residue was dissolved in dichloromethane, washed with brine (pH 5), dried over MgSO<sub>4</sub>, filtered, and evaporated under vacuum. The crude product was purified by silica

gel chromatography (DCM:MeOH = 10:1) to give **15** (0.18 g, 90% ) as a clear oil.  $^1\text{H}$  NMR (300 MHz,  $\text{CDCl}_3$ )  $\delta$  4.07 (br, 2H,  $\text{HC}\equiv\text{CCH}_2$ ), 3.61-3.34 (m, 88H,  $\text{CH}_2\text{OCH}_2\text{CH}_2\text{OCH}_2\text{CH}_2\text{OCH}_2$ ,  $\text{C}_3\text{N}_3\text{-NHCH}_2\text{CH}_2\text{CH}_2\text{O}$ ), 3.12 (br m, 8H,  $\text{BocNHCH}_2$ ), 2.17 (br, 1H,  $\text{HC}\equiv\text{CCH}_2$ ), 1.74-1.62 (m, 24H,  $\text{OCH}_2\text{CH}_2\text{CH}_2$ ), 1.34 (s, 36H,  $\text{C}(\text{CH}_3)_3$ );  $^{13}\text{C}$  NMR (75 MHz,  $\text{CDCl}_3$ )  $\delta$  165.4 (br,  $\text{C}_3\text{N}_3$ ), 156.0 (CO), 81.1 ( $\text{HC}\equiv\text{CCH}_2$ ), 78.7 ( $\text{C}(\text{CH}_3)_3$ ), 70.7 ( $\text{HC}\equiv\text{CCH}_2$ ), 70.5 ( $\text{OCH}_2\text{CH}_2\text{O}$ ), 70.2 ( $\text{OCH}_2\text{CH}_2\text{O}$ ), 70.1 ( $\text{OCH}_2\text{CH}_2\text{O}$ ) 69.4 ( $\text{CH}_2\text{CH}_2\text{CH}_2\text{O}$ ), 69.1 ( $\text{CH}_2\text{CH}_2\text{CH}_2\text{O}$ ), 38.4 ( $\text{CH}_2\text{CH}_2\text{CH}_2\text{O}$ ), 38.0 ( $\text{CH}_2\text{CH}_2\text{CH}_2\text{O}$ ), 30.1 ( $\text{HC}\equiv\text{CCH}_2$ ), 29.5 ( $\text{NHCH}_2\text{CH}_2\text{CH}_2\text{O}$ ), 28.4 ( $\text{C}(\text{CH}_3)_3$ ); MS (ESI-TOF) calcd for  $\text{C}_{92}\text{H}_{172}\text{N}_{22}\text{O}_{26}$  2001.2813, found 2002.2499 (M + H) $^+$ .

**Compound 16 (deprotected G1).** A solution of **15** (0.15 g, 0.075 mmol) in concentrated HCl (0.5 mL) and methanol (1.0 mL) was stirred for 16 h at room temperature and then evaporated under vacuum. The residue was dissolved in chloroform, washed with 5 M NaOH (aq), dried over  $\text{MgSO}_4$ , filtered, and evaporated under vacuum to give **16** (0.12 g, quantitative) as a clear oil.  $^1\text{H}$  NMR (300 MHz,  $\text{CDCl}_3$ )  $\delta$  4.09 (br, 2H,  $\text{HC}\equiv\text{CCH}_2$ ), 3.57-3.35 (m, 88H,  $\text{CH}_2\text{OCH}_2\text{CH}_2\text{OCH}_2\text{CH}_2\text{OCH}_2$ ,  $\text{C}_3\text{N}_3\text{-NHCH}_2\text{CH}_2\text{CH}_2\text{O}$ ), 2.76 (br, 8H,  $\text{OCH}_2\text{CH}_2\text{CH}_2\text{NH}_2$ ), 2.18 (br, 1H,  $\text{HC}\equiv\text{CCH}_2$ ), 1.77-1.64 (m, 24H,  $\text{OCH}_2\text{CH}_2\text{CH}_2$ );  $^{13}\text{C}$  NMR (75 MHz,  $\text{CDCl}_3$ )  $\delta$  166.0 ( $\text{C}_3\text{N}_3$ ), 81.1 ( $\text{HC}\equiv\text{CCH}_2$ ), 70.5 ( $\text{HC}\equiv\text{CCH}_2$ ,  $\text{OCH}_2\text{CH}_2\text{O}$ ), 70.2 ( $\text{OCH}_2\text{CH}_2\text{O}$ ), 70.1 (two lines,  $\text{OCH}_2\text{CH}_2\text{O}$ ) 69.4 ( $\text{CH}_2\text{CH}_2\text{CH}_2\text{O}$ ), 69.2 (two lines,  $\text{CH}_2\text{CH}_2\text{CH}_2\text{O}$ ), 39.4 ( $\text{CH}_2\text{CH}_2\text{CH}_2\text{O}$ ), 38.0 ( $\text{CH}_2\text{CH}_2\text{CH}_2\text{O}$ ), 32.4 ( $\text{OCH}_2\text{CH}_2\text{CH}_2\text{NH}_2$ ), 30.1 ( $\text{HC}\equiv\text{CCH}_2$ ), 29.6 ( $\text{NHCH}_2\text{CH}_2\text{CH}_2\text{O}$ ); MS (ESI-TOF) calcd for  $\text{C}_{72}\text{H}_{140}\text{N}_{22}\text{O}_{18}$  1601.0716, found 1602.0498 (M + H) $^+$ .



## Spectra of Compounds

|               |             |             |       |                 |              |                        |                    |
|---------------|-------------|-------------|-------|-----------------|--------------|------------------------|--------------------|
| Sample Name   | boc16g3-5   | Position    | P1-A1 | Instrument Name | Instrument 1 | User Name              |                    |
| Inj Vol       | -1          | InjPosition |       | SampleType      | Sample       | IRM Calibration Status | All Ions Missed    |
| Data Filename | boc16g3-6.d | ACQ Method  |       | Comment         |              | Acquired Time          | 3/28/2012 11:21:14 |

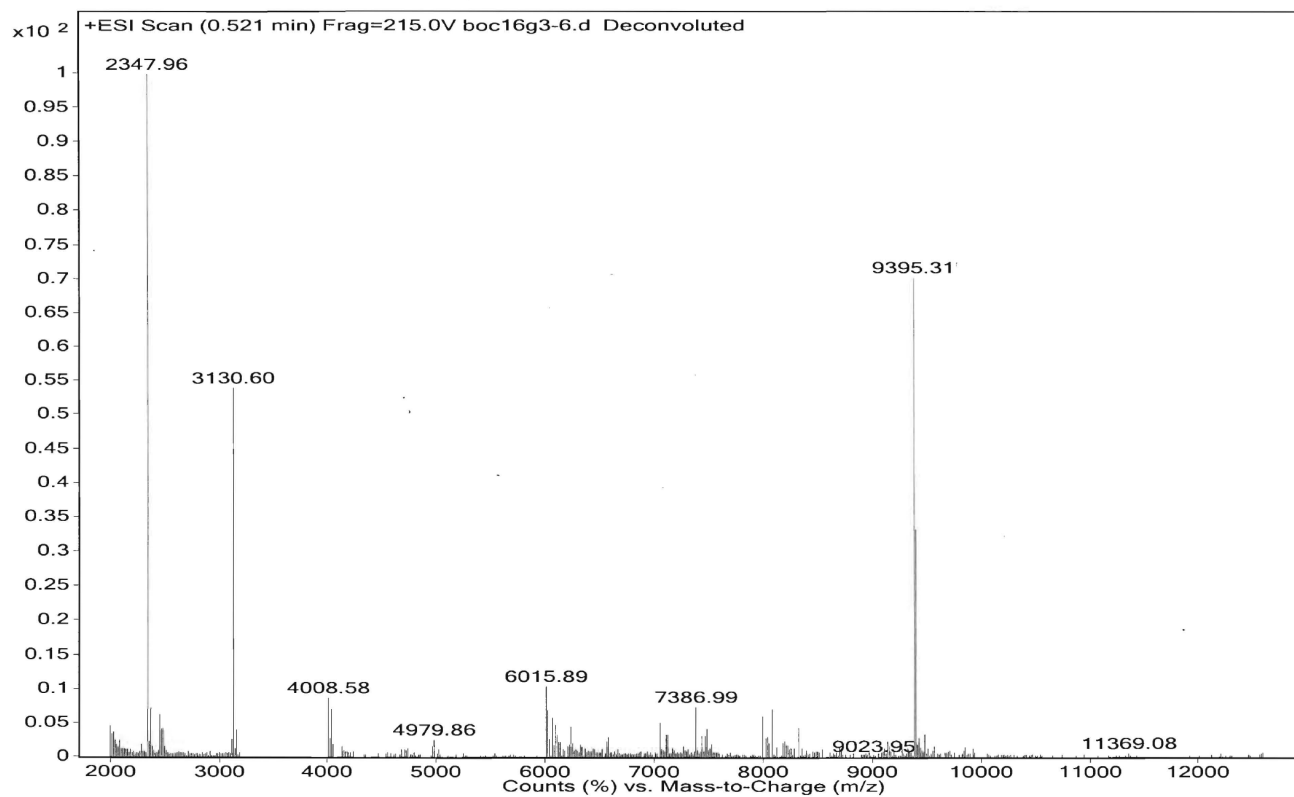

Figure S1. ESI-TOF mass spectrum of **1** (Boc-protected G3).

L\_Flex\_16Boc\_G3  
Sample ID: s\_20120521\_20  
File: /home/TCUuser/H.Fid  
Pulse Sequence: s2pul  
Solvent: cdcl3  
Ambient temperature  
Operator: TCUuser  
File: H  
Mercury-300BB "computer1"  
  
Relax. delay 1.000 sec  
Pulse 45.0 degrees  
Acq. time 1.998 sec  
Width 4800.8 Hz  
8 repetitions  
OBSERVE H1, 300.0452230 MHz  
DATA PROCESSING  
FT size 32768  
Total time 0 min, 35 sec

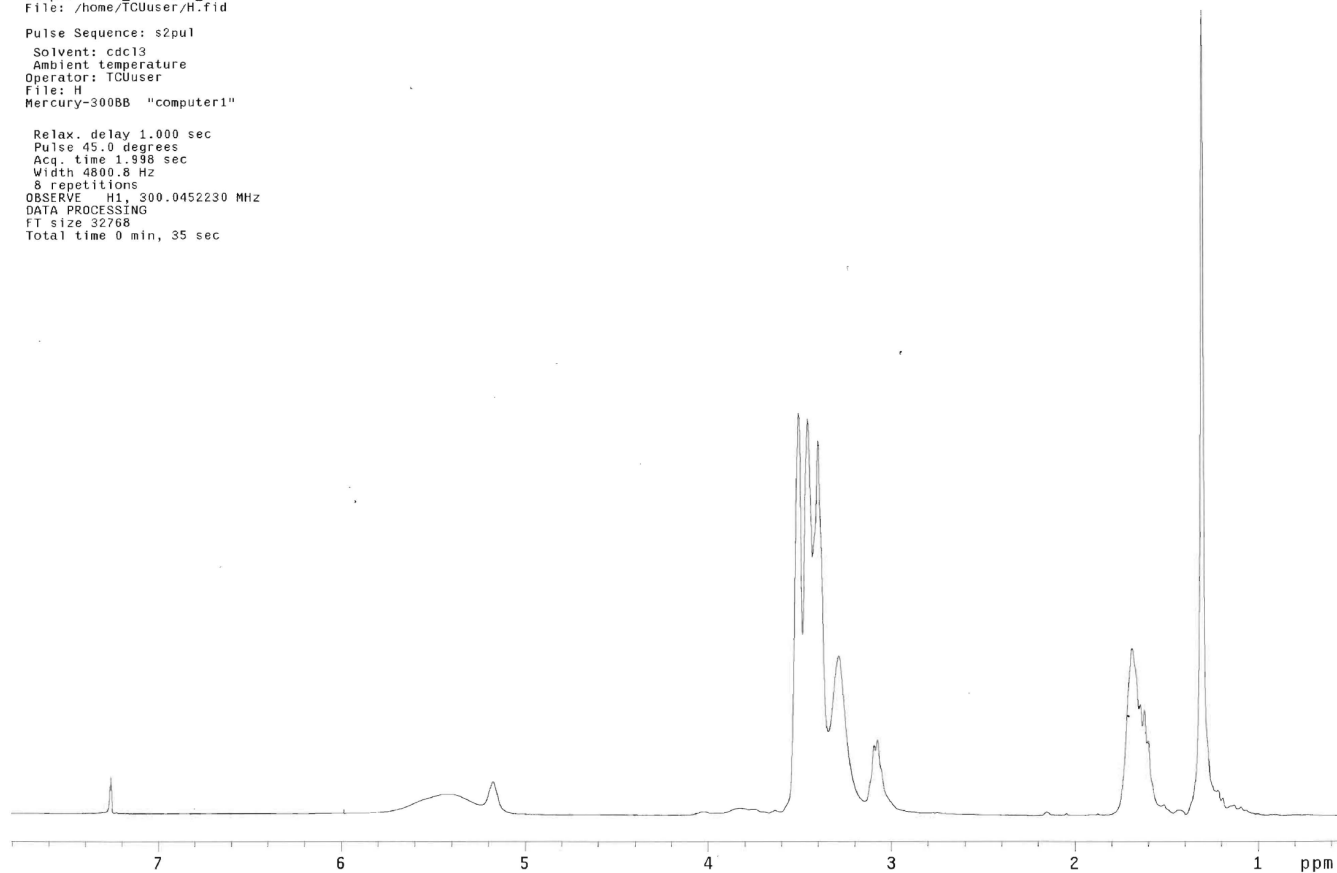

**Figure S2.** <sup>1</sup>H NMR spectrum of **1** (Boc-protected G3, 300 MHz, CDCl<sub>3</sub>).

L\_Flex\_16Boc\_G3  
Sample ID: s\_20120521\_22  
File: s\_20120521\_22/data/cdc13\_01.fid  
Pulse Sequence: s2pul  
Solvent: cdc13  
Ambient temperature  
Operator: TCUuser  
File: cdc13\_01  
Mercury-300BB "computer1"  
  
Relax. delay 1.000 sec  
Pulse 45.0 degrees  
Acq. time 1.301 sec  
Width 15083.0 Hz  
32 repetitions  
OBSERVE C13, 75.4464383 MHz  
DECOUPLE H1, 300.0467408 MHz  
Power 35 dB  
continuously on  
WALTZ-16 modulated  
DATA PROCESSING  
Line broadening 0.5 Hz  
FT size 65536  
Total time 40 min, 22 sec

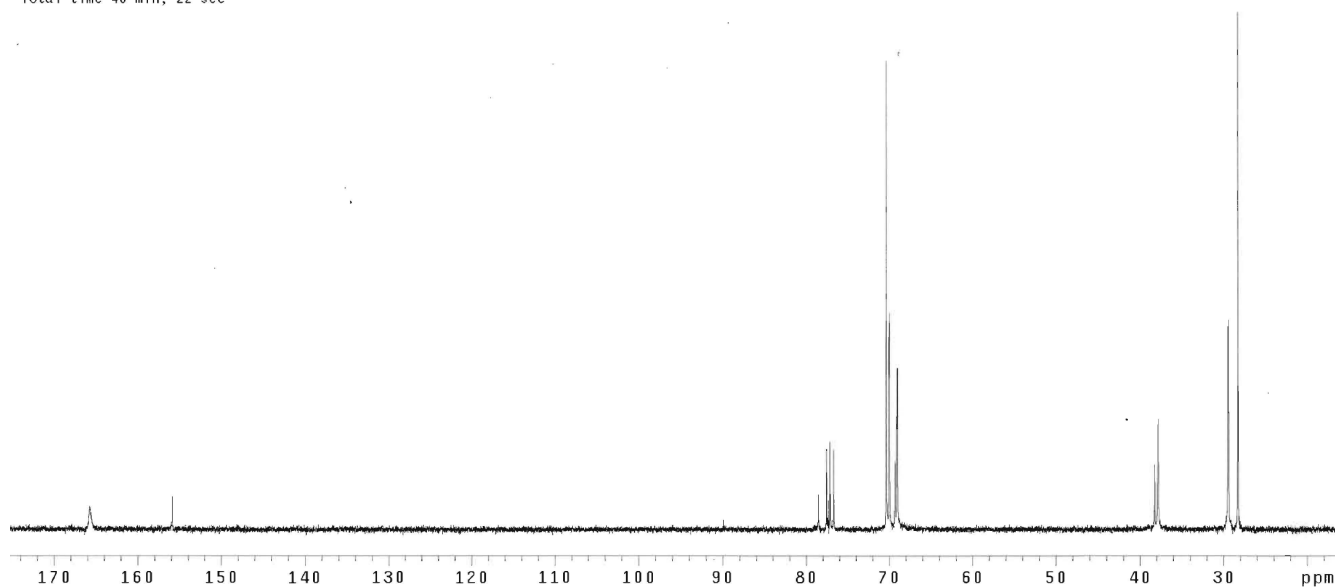

**Figure S3.**  $^{13}\text{C}$  NMR spectrum of **1** (Boc-protected G3, 75 MHz,  $\text{CDCl}_3$ ).

|               |                 |             |       |                 |              |                        |                    |
|---------------|-----------------|-------------|-------|-----------------|--------------|------------------------|--------------------|
| Sample Name   | G3-16NH2-depr   | Position    | P1-A1 | Instrument Name | Instrument 1 | User Name              |                    |
| Inj Vol       | -1              | InjPosition |       | SampleType      | Sample       | IRM Calibration Status | All Ions Missed    |
| Data Filename | G3-16NH2-depr.d | ACQ Method  |       | Comment         |              | Acquired Time          | 5/22/2012 11:55:38 |

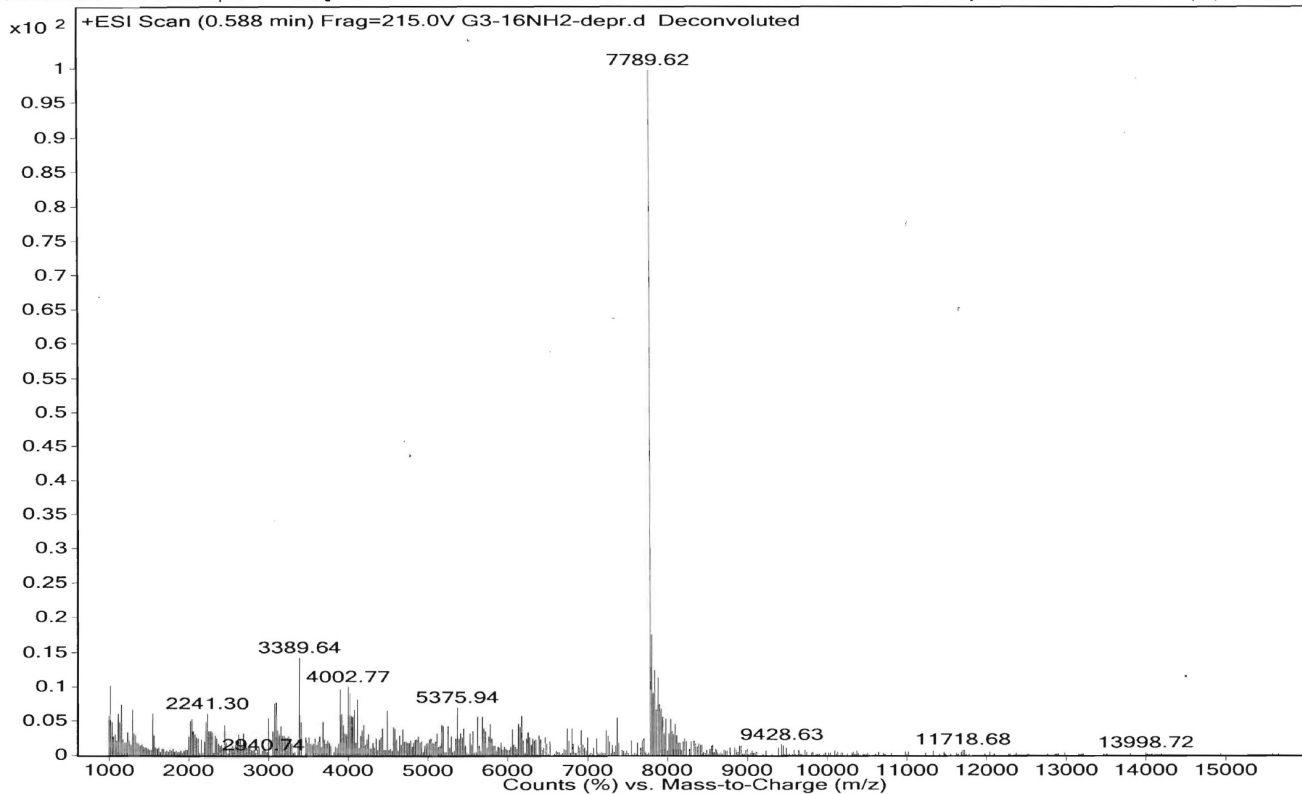

Figure S4. ESI-TOF mass spectrum of **2** (deprotected G3).

LF-G3-16NH2  
Sample ID: s\_20121009\_32  
File: s\_20121009\_32/data/cdc13\_01.fid  
Pulse Sequence: s2pu1  
Solvent: cdc13  
Ambient temperature  
Operator: TCUser  
File: cdc13\_01  
Mercury-300BB "computer1"  
  
Relax. delay 1.000 sec  
Pulse 45.0 degrees  
Acq. time 1.998 sec  
Width 3000.3 Hz  
15 repetitions  
OBSERVE H1, 300.0452168 MHz  
DATA PROCESSING  
FT size 16384  
Total time 0 min, 59 sec

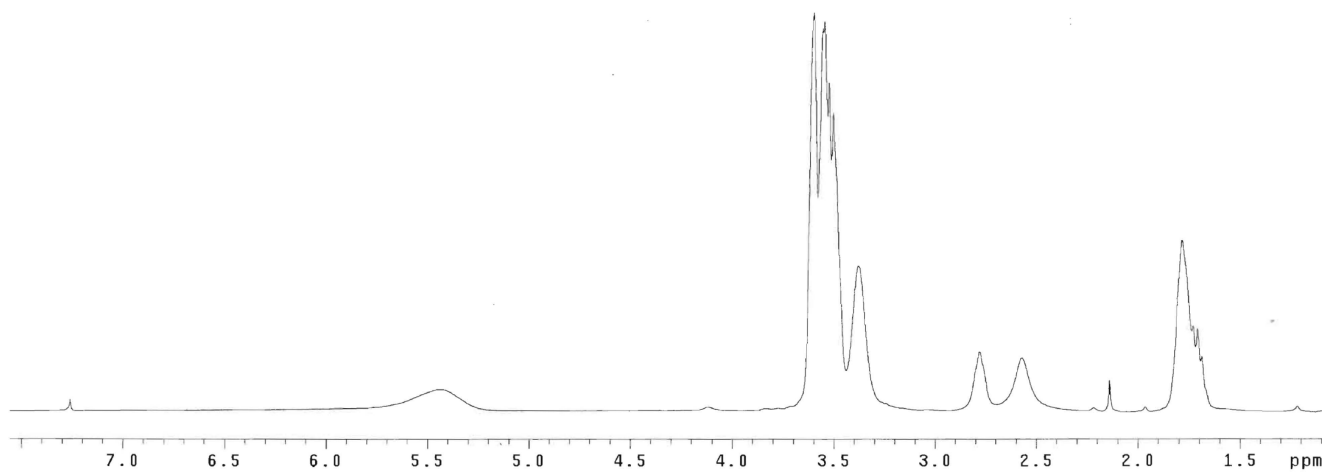

**Figure S5.**  $^1\text{H}$  NMR spectrum of **2** (deprotected G3, 300 MHz,  $\text{CDCl}_3$ ).

LF-G3-16NH2  
Sample ID: s\_20121009\_33  
File: s\_20121009\_33/data/cdc13\_01.fid  
Pulse Sequence: s2pu1  
Solvent: cdc13  
Ambient temperature  
Operator: TCUser  
File: cdc13\_01  
Mercury-300BB "computer1"  
  
Relax. delay 1.000 sec  
Pulse 45.0 degrees  
Acq. time 1.301 sec  
Width 15083.0 Hz  
32 repetitions  
OBSERVE C13, 75.4464231 MHz  
DECOUPLE H1, 300.0467408 MHz  
Power 35 dB  
continuously on  
WALTZ-16 modulated  
DATA PROCESSING  
Line broadening 0.5 Hz  
FT size 65536  
Total time 6 hr, 42 min, 1 sec

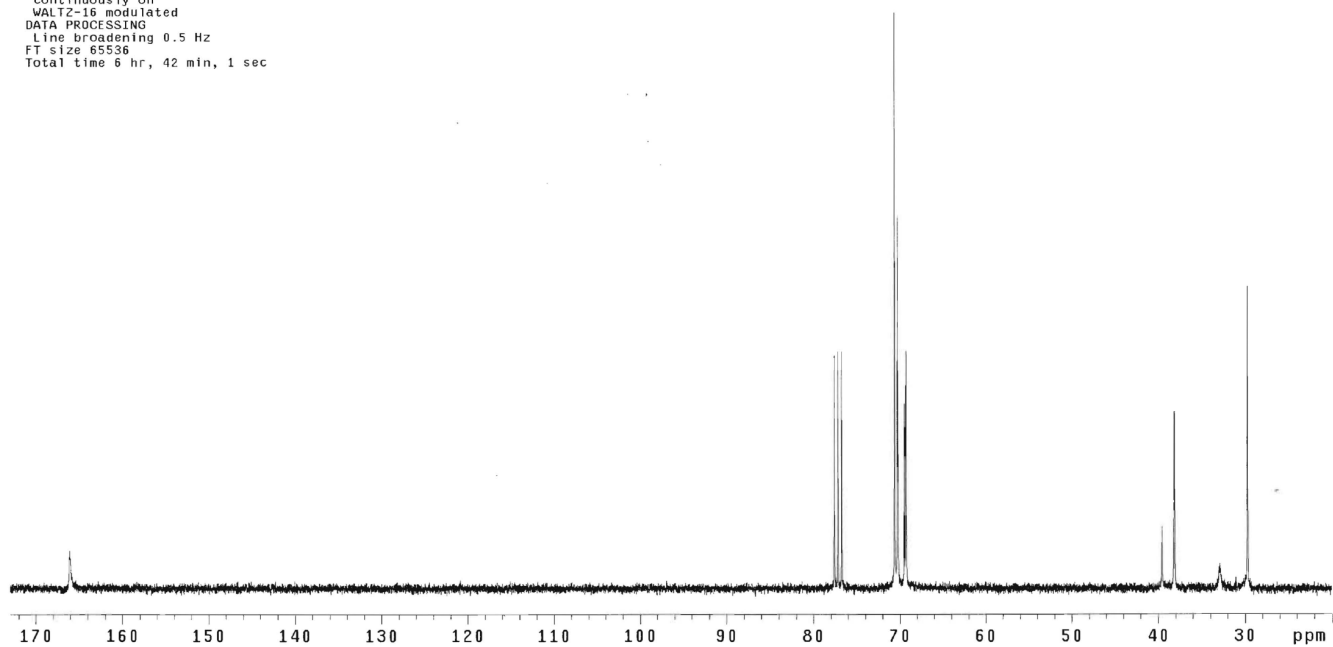

Figure S6. <sup>13</sup>C NMR spectrum of **2** (deprotected G3, 75 MHz, CDCl<sub>3</sub>).

| Sample Name   | testj   | Position    | P1-A1 | Instrument Name | Instrument 1 | User Name              |                      |
|---------------|---------|-------------|-------|-----------------|--------------|------------------------|----------------------|
| Inj Vol       | -1      | InjPosition |       | SampleType      | Sample       | IRM Calibration Status | All Ions Missed      |
| Data Filename | testj.d | ACQ Method  |       | Comment         |              | Acquired Time          | 5/31/2012 11:00:23 A |

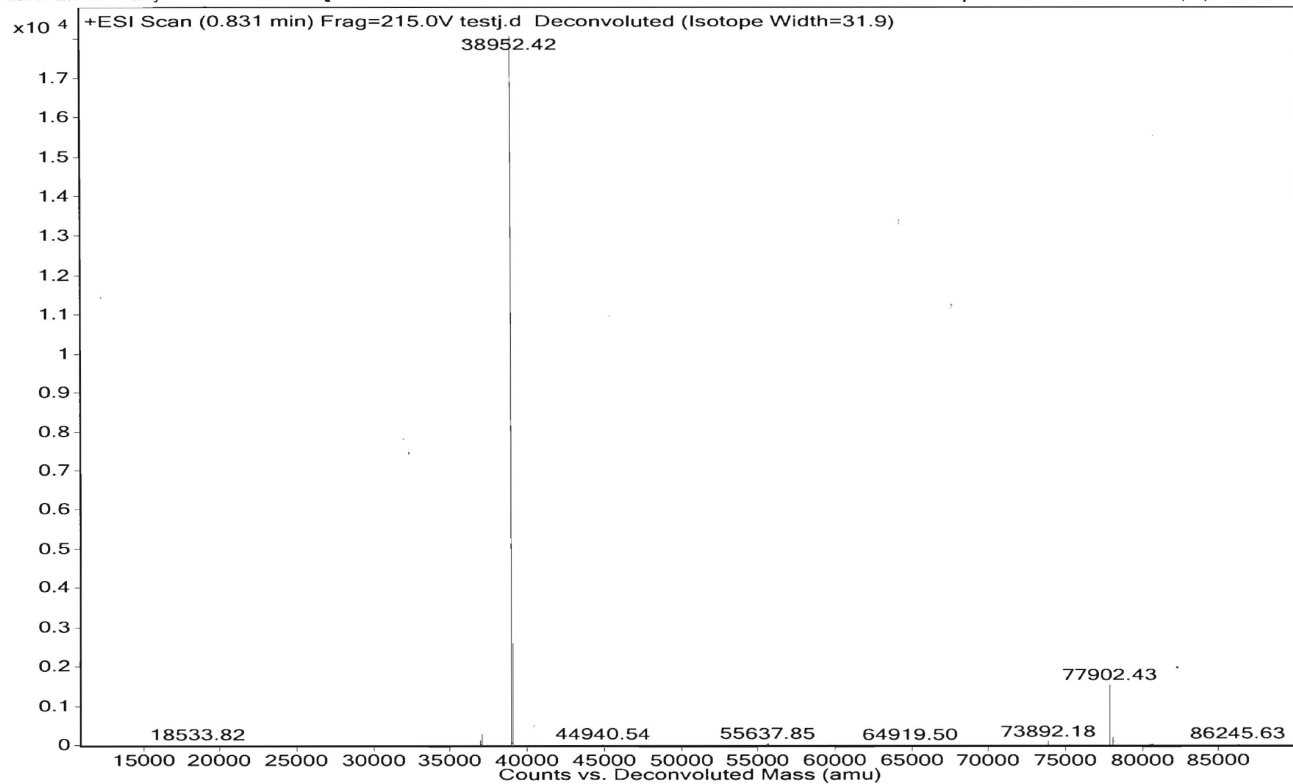

**Figure S7.** ESI-TOF mass spectrum of **3** (Boc-protected G5). The peak at 77902 is attributed to noncovalent dimer seen in the deconvolution, and not a synthetic impurity.

L-Flex-G5Boc64  
Sample ID: s\_20120605\_28  
File: s\_20120605\_28/data/cdcl3\_01.fid  
Pulse Sequence: s2pul  
Solvent: cdcl3  
Ambient temperature  
Operator: TCUser  
File: cdcl3\_01  
Mercury-300BB "computer1"  
  
Relax. delay 1.000 sec  
Pulse 45.0 degrees  
Acq. time 1.998 sec  
Width 3601.0 Hz  
8 repetitions  
OBSERVE H1, 300.0452184 MHz  
DATA PROCESSING  
FT size 16384  
Total time 0 min, 35 sec

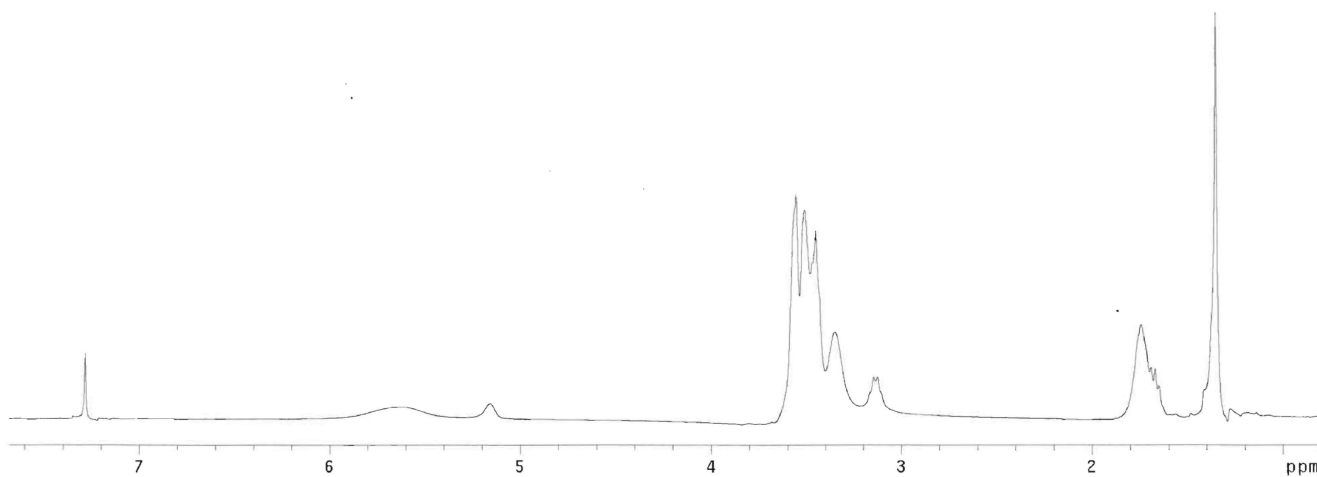

**Figure S8.**  $^1\text{H}$  NMR spectrum of **3** (Boc-protected G5, 300 MHz,  $\text{CDCl}_3$ ).



L-Flex-G5-Boc64  
Sample ID: s\_20120605\_29  
File: s\_20120605\_29/data/cdc13\_01.fid  
Pulse Sequence: s2pu1  
Solvent: cdc13  
Ambient temperature  
Operator: TCUser  
File: cdc13\_01  
Mercury-300BB "computer1"  
  
Relax. delay 1.000 sec  
Pulse 45.0 degrees  
Acq. time 1.301 sec  
Width 15083.0 Hz  
32 repetitions  
OBSERVE C13, 75.4464351 MHz  
DECOUPLE H1, 300.0467408 MHz  
Power 35 dB  
continuously on  
WALTZ-16 modulated  
DATA PROCESSING  
Line broadening 0.5 Hz  
FT size 65536  
Total time 40 min, 22 sec

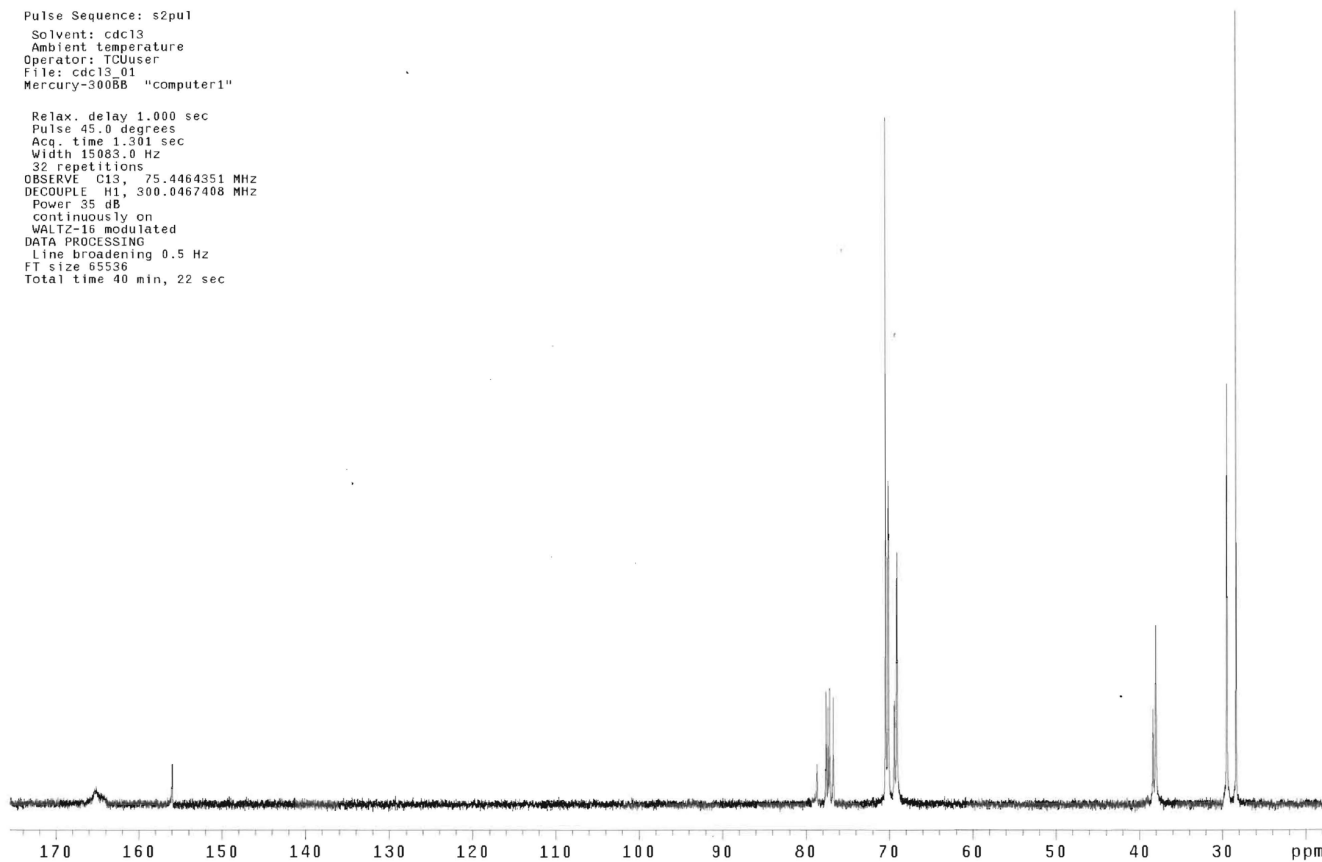

**Figure S9.**  $^{13}\text{C}$  NMR spectrum of **3** (Boc-protected G5, 75 MHz,  $\text{CDCl}_3$ ).

L-Flex-G5-64NH2  
File: exp  
Pulse Sequence: s2pu1  
Solvent: cdc13  
Ambient temperature  
Operator: TCUser  
Mercury-300BB "computer1"

Relax. delay 1.000 sec  
Pulse 45.0 degrees  
Acq. time 1.998 sec  
Width 3000.3 Hz  
32 repetitions  
OBSERVE H1, 300.0452188 MHz  
DATA PROCESSING  
FT size 16384  
Total time 1 min, 39 sec

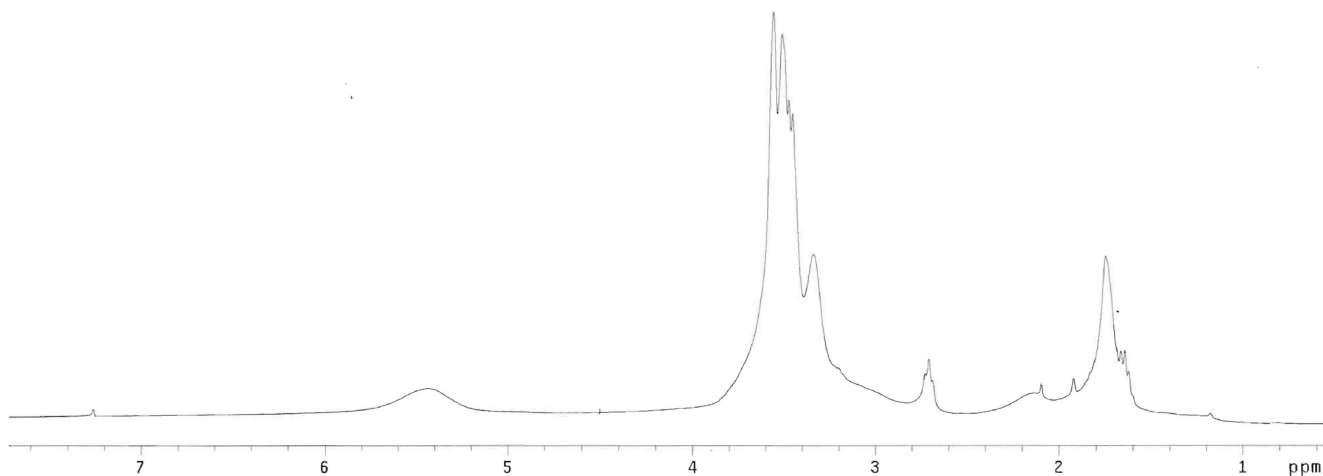

**Figure S10.** <sup>1</sup>H NMR spectrum of **4** (deprotected G5, 300 MHz, CDCl<sub>3</sub>).

L-Flex-G5-64NH2  
Sample ID: s\_20120612\_02  
File: s\_20120612\_02/data/cdcl3\_01.fid  
Pulse Sequence: s2pu1  
Solvent: cdcl3  
Ambient temperature  
Operator: TCUser  
File: cdcl3\_01  
Mercury-300EB "computer1"  
  
Relax. delay 1.000 sec  
Pulse 45.0 degrees  
Acq. time 1.301 sec  
Width 15083.0 Hz  
64 repetitions  
OBSERVE C13, 75.4464304 MHz  
DECOUPLE H1, 500.0467408 MHz  
Power 55 dB  
continuously on  
WALTZ-16 modulated  
DATA PROCESSING  
Line broadening 0.5 Hz  
FT size 65536  
Total time 40 min, 13 sec

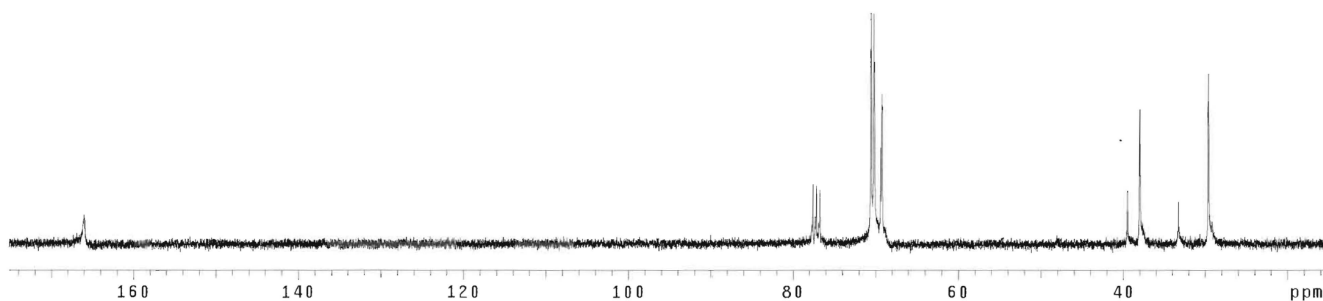

**Figure S11.** <sup>13</sup>C NMR spectrum of **4** (deprotected G5, 75 MHz, CDCl<sub>3</sub>).

L-Flex-G7-Boc256  
Sample ID: s\_20120703\_10  
File: s\_20120703\_10\data/cdcl3\_02.fid  
Pulse Sequence: s2pu1  
Solvent: cdcl3  
Ambient temperature  
Operator: TCUser  
File: cdcl3\_02  
Mercury-300B5 "computer1"  
  
Relax. delay 1.000 sec  
Pulse 45.0 degrees  
Acq. time 1.998 sec  
Width 3000.3 Hz  
8 repetitions  
OBSERVE H1, 300.0452111 MHz  
DATA PROCESSING  
FT size 16384  
Total time 0 min, 35 sec

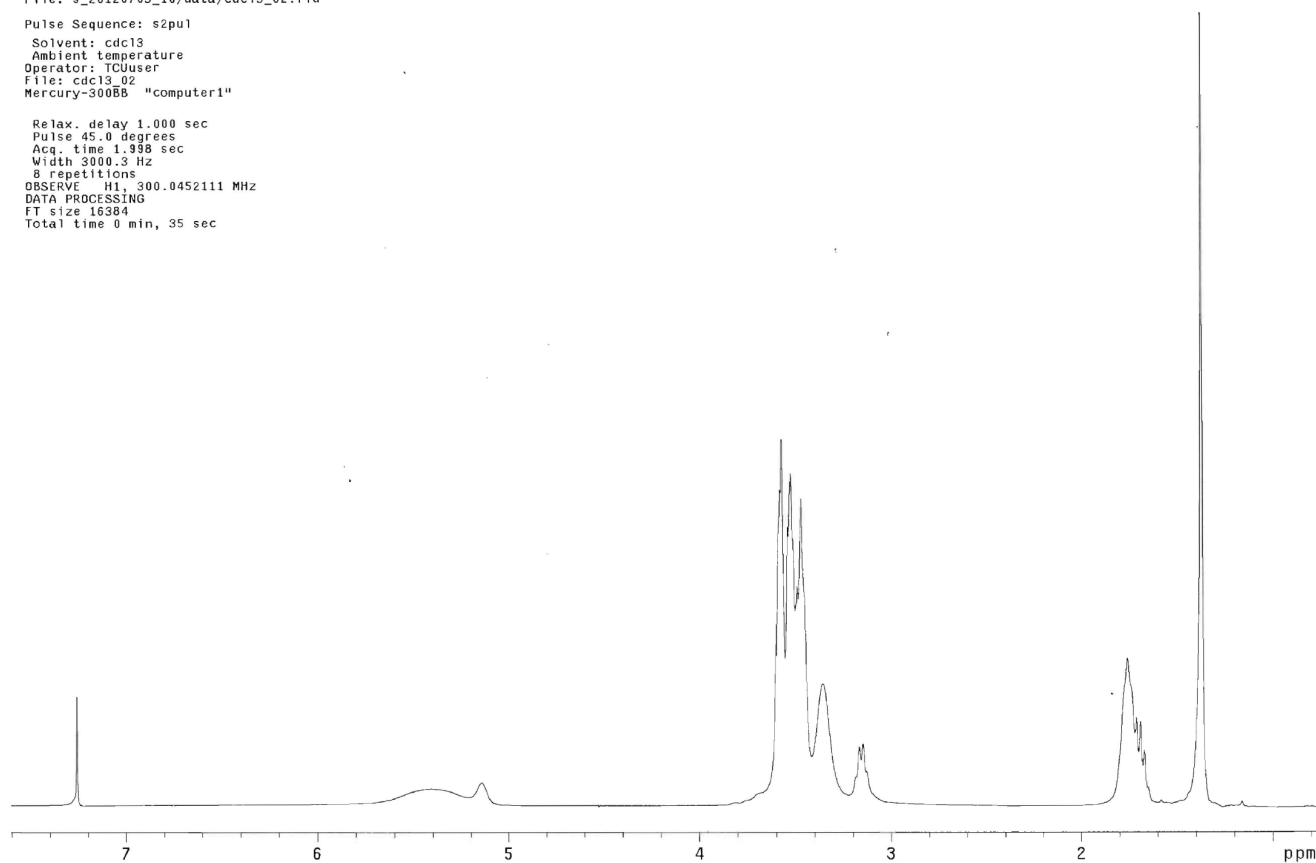

**Figure S12.**  $^1\text{H}$  NMR spectrum of **5** (Boc-protected G7, 300 MHz,  $\text{CDCl}_3$ ).

L-Flex-G7-Boc256  
Sample ID: s\_20120703\_11  
File: s\_20120703\_11/data/cdc13\_01.fid  
Pulse Sequence: s2pu1  
Solvent: cdc13  
Ambient temperature  
Operator: TCUser  
File: cdc13\_01  
Mercury-300BB "computer1"  
  
Relax. delay 1.000 sec  
Pulse 45.0 degrees  
Acq. time 1.301 sec  
Width 15083.0 Hz  
32 repetitions  
OBSERVE C13, 75.4464258 MHz  
DECOUPLE H1, 300.0467408 MHz  
Power 35 dB  
continuously on  
WALTZ-16 modulated  
DATA PROCESSING  
Line broadening 0.5 Hz  
FT size 65536  
Total time 40 min, 22 sec

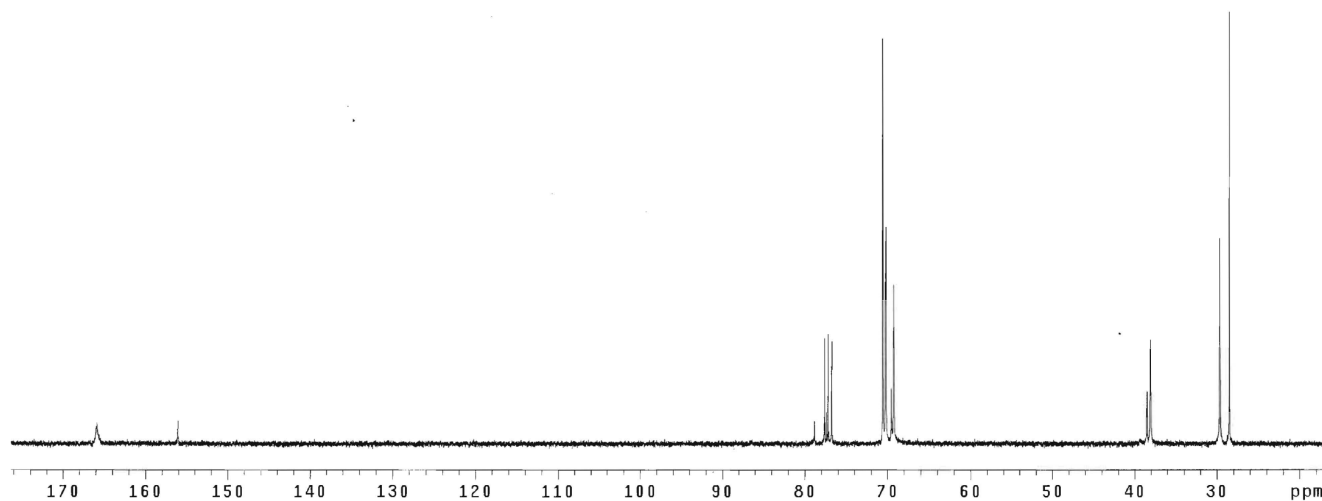

Figure S13.  $^{13}\text{C}$  NMR spectrum of **5** (Boc-protected G7, 75 MHz,  $\text{CDCl}_3$ ).

L-Flex-G7-256NH2  
Sample ID: s\_20120706\_21  
File: s\_20120706\_21\data\cdc13\_01.fid  
Pulse Sequence: s2pu1  
Solvent: cdc13  
Ambient temperature  
Operator: TCuser  
File: cdc13\_01  
Mercury-300BB "computer1"  
  
Relax. delay 1.000 sec  
Pulse 45.0 degrees  
Acq. time 1.998 sec  
Width 3000.3 Hz  
16 repetitions  
OBSERVE H1, 300.0452059 MHz  
DATA PROCESSING  
F1 size 16384  
Total time 0 min, 59 sec

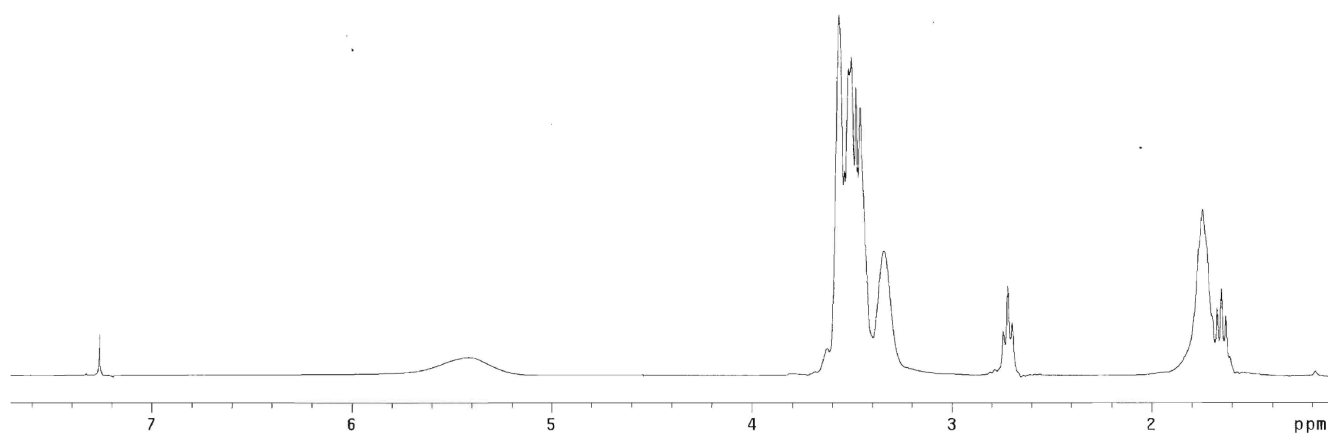

**Figure S14.**  $^1\text{H}$  NMR spectrum of **6** (deprotected G7, 300 MHz,  $\text{CDCl}_3$ ).

L-Flex\_G7-250MHz  
Sample ID: s\_20120706\_24  
File: s\_20120706\_24\data/cdc13\_01.fid  
Pulse Sequence: s2pul  
Solvent: cdc13  
Ambient temperature  
Operator: TCUser  
File: cdc13\_01  
Mercury-30000 "computer1"  
  
Relax, delay 1.000 sec  
Pulse 45.0 degrees  
Acq. time 1.301 sec  
Width 15083.0 Hz  
32 repetitions  
OBSERVE C13, 75.4464254 MHz  
DECOUPLE H1, 300.0467408 MHz  
Power 35 dB  
continuously on  
WALTZ-16 modulated  
DATA PROCESSING  
Line Broadening 0.5 Hz  
FT size 65536  
Total time 40 min, 22 sec

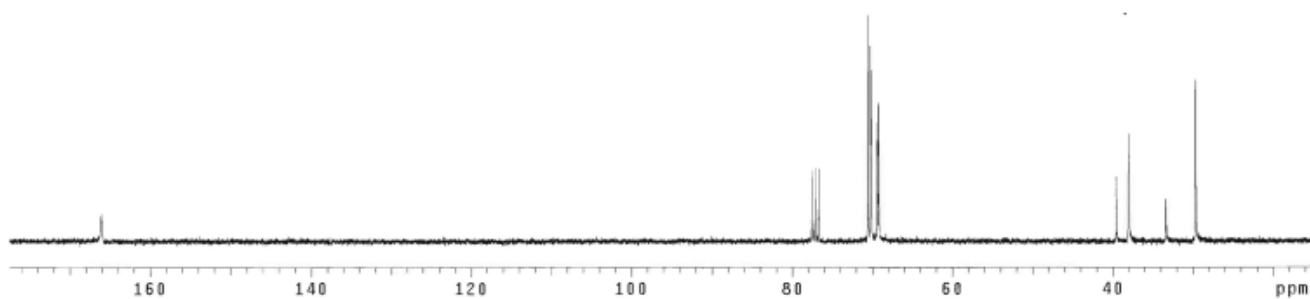

Figure S15.  $^{13}\text{C}$  NMR spectrum of **6** (deprotected G7, 75 MHz,  $\text{CDCl}_3$ ).

L-Flex-G9-1024Boc  
Sample ID: s\_20120720\_11  
File: s\_20120720\_11\data/cdcl3\_01.fid  
Pulse Sequence: s2pul  
Solvent: cdcl3  
Ambient temperature  
Operator: TCuser  
File: cdcl3\_01  
Mercury-300BB "computer1"  
  
Relax. delay 1.000 sec  
Pulse 45.0 degrees  
Acq. time 1.998 sec  
Width 3000.3 Hz  
16 repetitions  
OBSERVE H1, 300.0452169 MHz  
DATA PROCESSING  
FT size 16384  
Total time 0 min, 59 sec

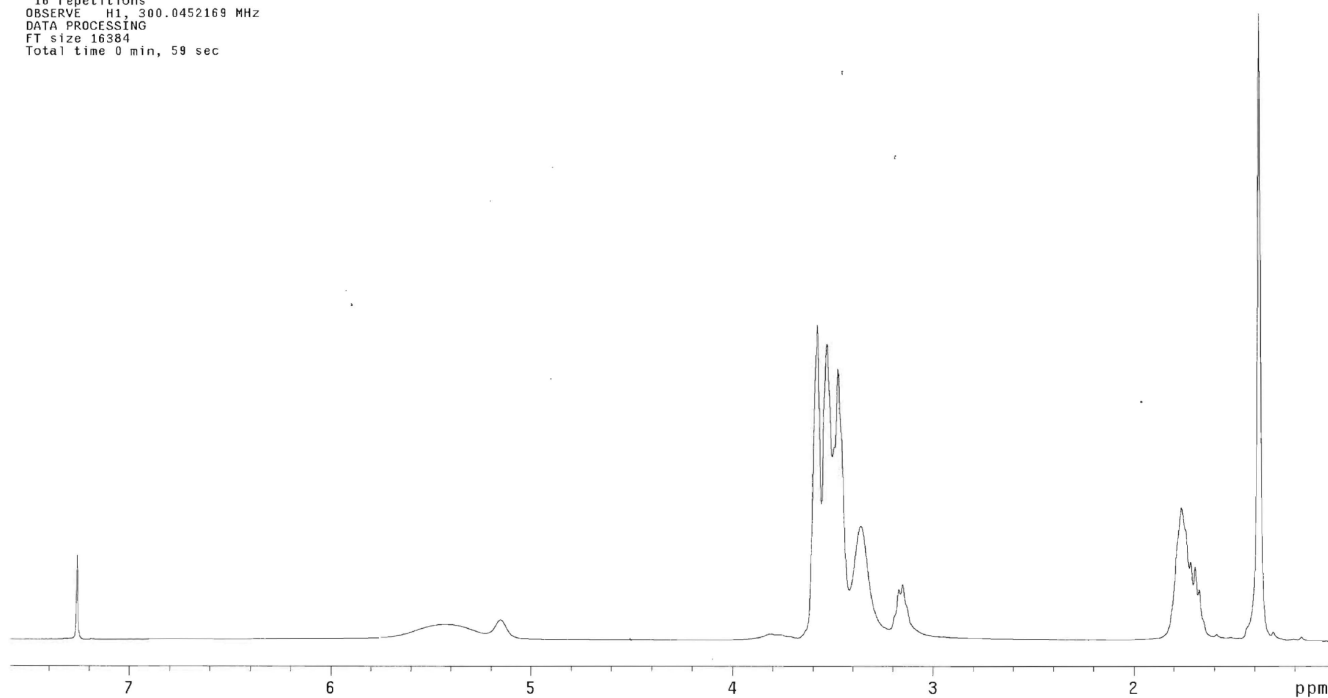

**Figure S16.**  $^1\text{H}$  NMR spectrum of **7** (Boc-protected G9, 300 MHz,  $\text{CDCl}_3$ ).



L-Flex-G9-1024Boc  
Sample ID: s\_20120720\_12  
File: s\_20120720\_12/data/cdcl3\_01.fid  
Pulse Sequence: s2pu1  
Solvent: cdcl3  
Ambient temperature  
Operator: TCUser  
File: cdcl3\_01  
Mercury-300BB "computer1"  
  
Relax. delay 1.000 sec  
Pulse 45.0 degrees  
Acq. time 1.301 sec  
Width 15083.0 Hz  
32 repetitions  
OBSERVE C13, 75.4464263 MHz  
DECOUPLE H1, 300.0467408 MHz  
Power 35 dB  
continuously on  
WALTZ-16 modulated  
DATA PROCESSING  
Line broadening 0.5 Hz  
FT size 65536  
Total time 40 min, 22 sec

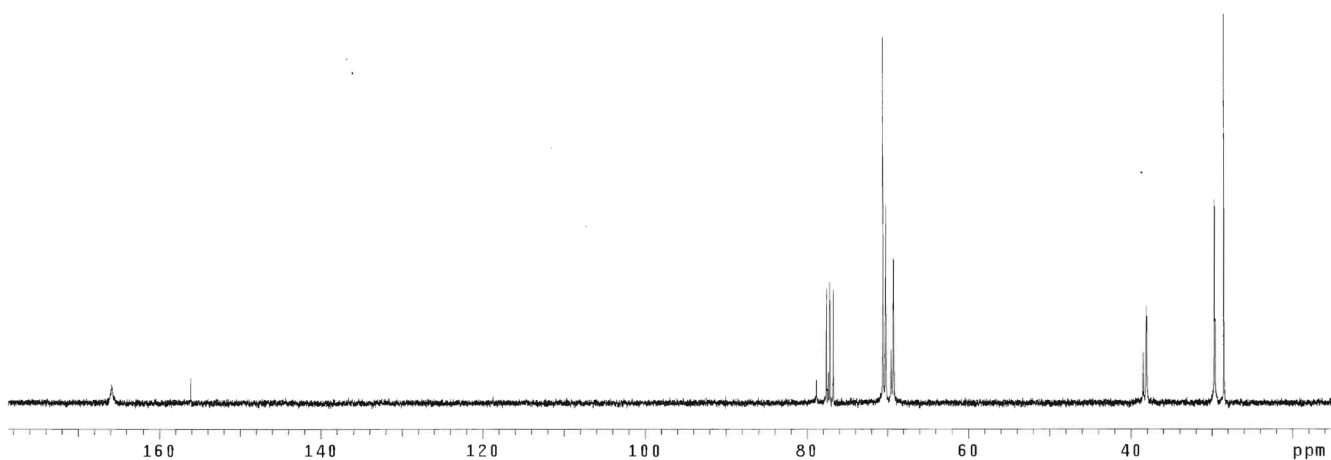

Figure S17.  $^{13}\text{C}$  NMR spectrum of **7** (Boc-protected G9, 75 MHz,  $\text{CDCl}_3$ ).

L-Flex-G9-1024NH2  
Sample ID: s\_20120723\_21  
File: s\_20120723\_21/data/cdc13\_01.fid  
Pulse Sequence: s2pul  
Solvent: cdc13  
Ambient temperature  
Operator: TCUuser  
File: cdc13\_01  
Mercury-300BB "computer1"  
  
Relax. delay 1.000 sec  
Pulse 45.0 degrees  
Acq. time 1.998 sec  
Width 3000.3 Hz  
16 repetitions  
OBSERVE H1, 300.0452169 MHz  
DATA PROCESSING  
FT size 16384  
Total time 0 min, 59 sec

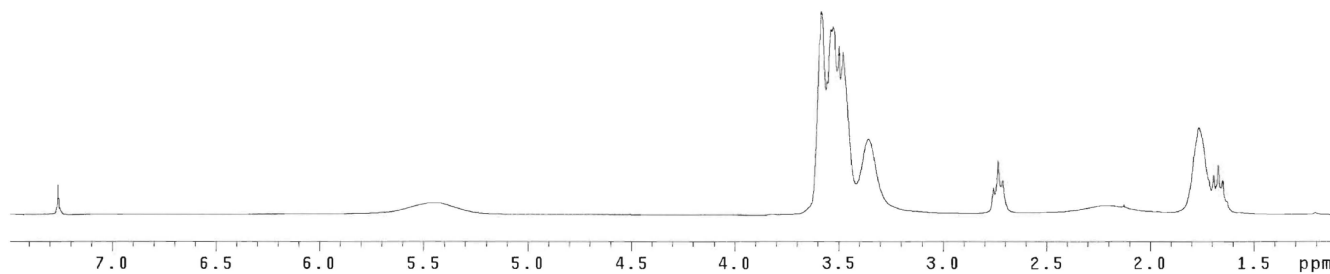

**Figure S18.**  $^1\text{H}$  NMR spectrum of **8** (deprotected G9, 300 MHz,  $\text{CDCl}_3$ ).

L-Flex-G9-1024NH2  
Sample ID: s\_20120723\_22  
File: s\_20120723\_22/data/cdcl3\_01.fid  
Pulse Sequence: s2pu1  
Solvent: cdcl3  
Ambient temperature  
Operator: TCUuser  
File: cdcl3\_01  
Mercury-300BB "computer1"  
  
Relax. delay 1.000 sec  
Pulse 45.0 degrees  
Acq. time 1.301 sec  
Width 15083.0 Hz  
32 repetitions  
OBSERVE C13, 75.4464254 MHz  
DECOUPLE H1, 300.0467408 MHz  
Power 35 dB  
continuously on  
WALTZ-16 modulated  
DATA PROCESSING  
Line broadening 0.5 Hz  
FT size 65536  
Total time 40 min, 22 sec

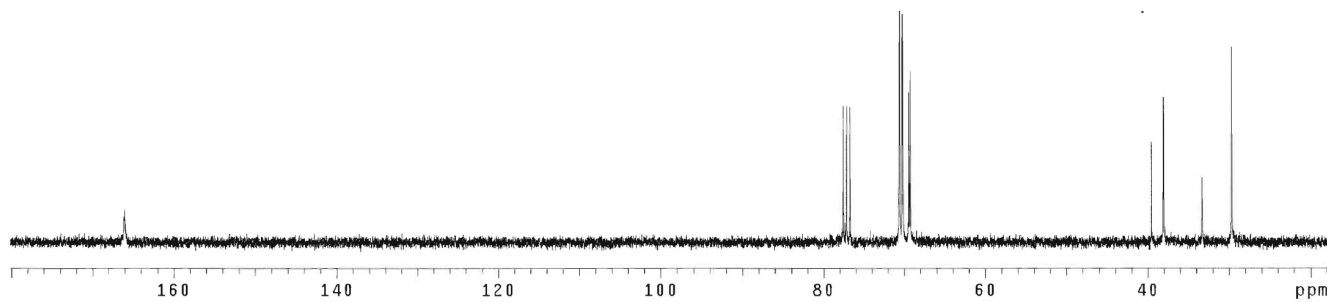

Figure S19. <sup>13</sup>C NMR spectrum of **8** (deprotected G9, 75 MHz, CDCl<sub>3</sub>).

L-Flex-4096Boc-G11  
Sample ID: s\_20120803\_15  
File: s\_20120803\_15/data/cdc13\_01.fid  
Pulse Sequence: s2pu1  
Solvent: cdc13  
Ambient temperature  
Operator: TCUser  
File: cdc13\_01  
Mercury-300BB "computer1"  
  
Relax. delay 1.000 sec  
Pulse 45.0 degrees  
Acq. time 1.998 sec  
Width 3000.3 Hz  
3 repetitions  
OBSERVE H1, 300.0452173 MHz  
DATA PROCESSING  
FT size 16384  
Total time 0 min, 35 sec

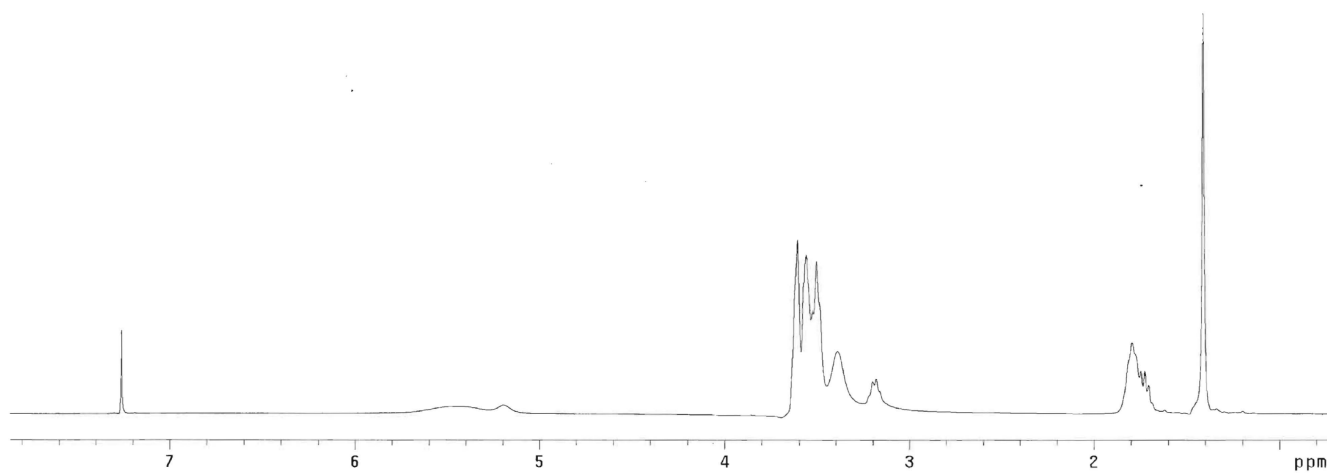

**Figure S20.**  $^1\text{H}$  NMR spectrum of **9** (Boc-protected G11, 300 MHz,  $\text{CDCl}_3$ ).

L-Flex-G11-4096Boc  
Sample ID: s\_20120812\_03  
File: s\_20120812\_03/data/cdcl3\_01.fid  
Pulse Sequence: s2pu1  
Solvent: cdcl3  
Ambient temperature  
Operator: TCUser  
File: cdcl3\_01  
Mercury-3005B "computer1"  
  
Relax. delay 1.000 sec  
Pulse 45.0 degrees  
Acq. time 1.301 sec  
Width 15083.0 Hz  
16 repetitions  
OBSERVE C13, 75.4464240 MHz  
DECOUPLE H1, 300.0467408 MHz  
Power 35 dB  
continuously on  
WALTZ-16 modulated  
DATA PROCESSING  
Line broadening 0.5 Hz  
FT size 65536  
Total time 1 hr, 23 min, 11 sec

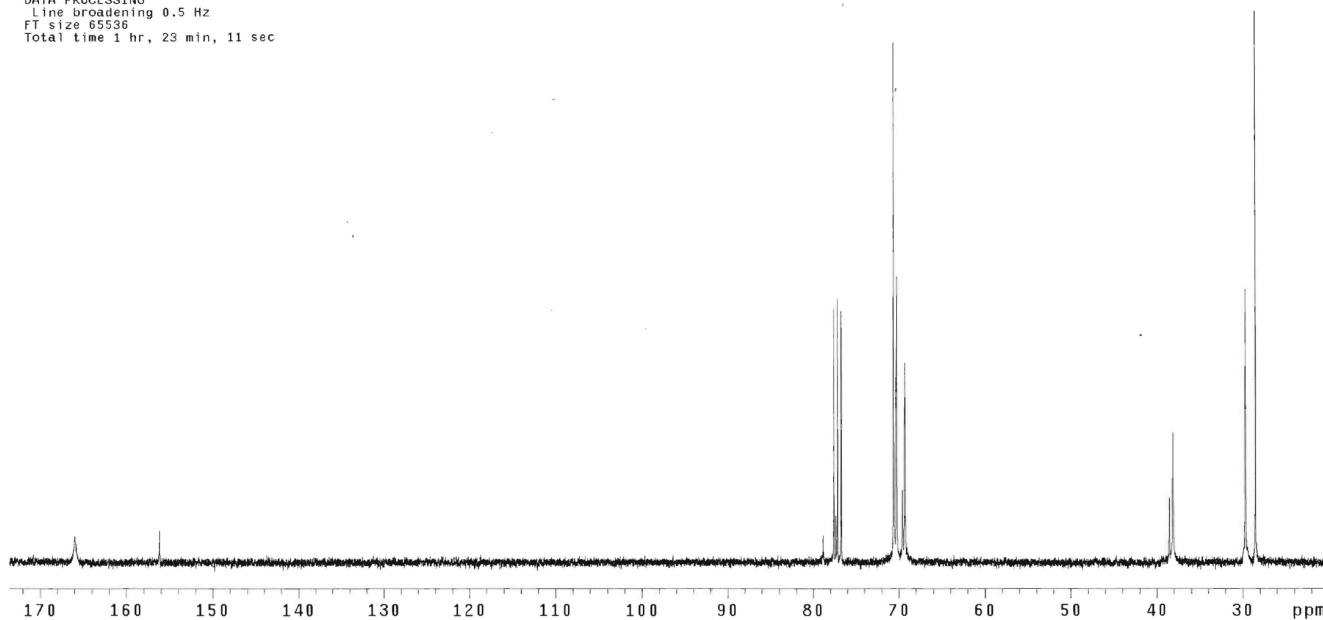

Figure S21.  $^{13}\text{C}$  NMR spectrum of **9** (Boc-protected G11, 75 MHz,  $\text{CDCl}_3$ ).

L-Flex-G11-4096NH2  
pad=10 run with findz0 before acquisition  
Sample ID: s\_20120814\_31  
File: s\_20120814\_31/data/cdc13\_01.fid  
Pulse Sequence: s2pul  
Solvent: cdc13  
Ambient temperature  
Operator: TCUuser  
File: cdc13\_01  
Mercury-300BB "computer1"  
Relax. delay 1.000 sec  
Pulse 45.0 degrees  
Acq. time 1.938 sec  
Width 3000.3 Hz  
16 repetitions  
OBSERVE H1, 300.0452173 MHz  
DATA PROCESSING  
FT size 16384  
Total time 0 min, 59 sec

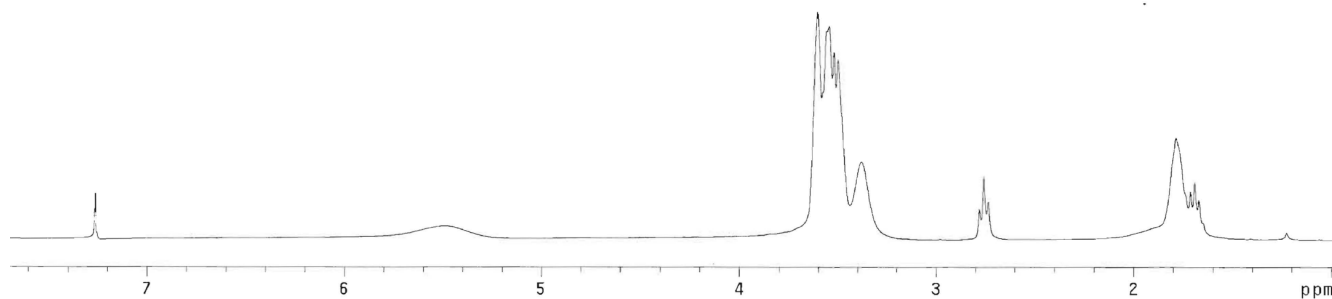

**Figure S22.**  $^1\text{H}$  NMR spectrum of **10** (deprotected G11, 300 MHz,  $\text{CDCl}_3$ ).

L-Flex-G11-4096NH2  
Sample ID: s\_20120814\_27  
File: /home/TCUser/L\_Flex\_G11\_4096NH2\_C.fid  
Pulse Sequence: s2pu1  
Solvent: cdcl3  
Ambient temperature  
Operator: TCUser  
File: L\_Flex\_G11\_4096NH2\_C  
Mercury-300BB "Computer1"  
  
Relax. delay 1.000 sec  
Pulse 45.0 degrees  
Acq. time 1.301 sec  
Width 15083.0 Hz  
16 repetitions  
OBSERVE C13, 75.4467425 MHz  
DECOUPLE H1, 300.0467408 MHz  
Power 35 dB  
continuously on  
WALTZ-16 modulated  
DATA PROCESSING  
Line broadening 0.5 Hz  
FT size 65536  
Total time 41 min, 42 sec

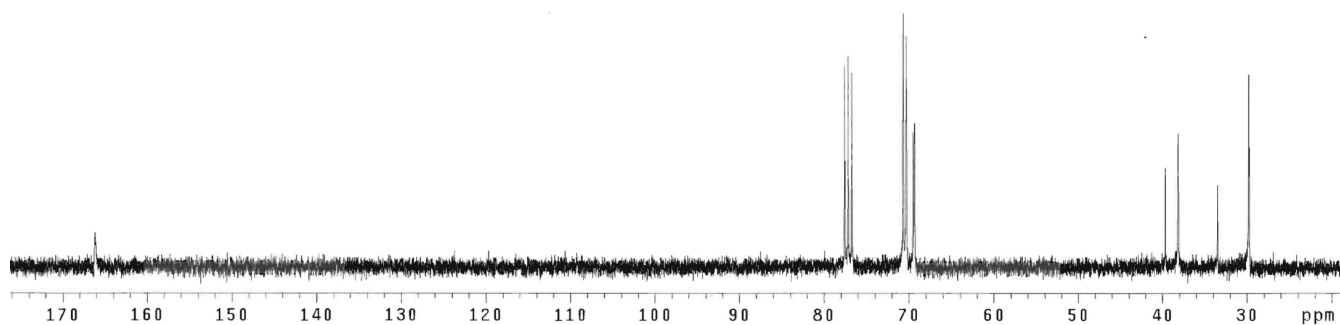

Figure S23.  $^{13}\text{C}$  NMR spectrum of **10** (deprotected G11, 75 MHz,  $\text{CDCl}_3$ ).

L-Flex-G13-16384Boc  
Sample ID: s\_20120822\_12  
File: s\_20120822\_12/data/cdc13\_01.fid  
Pulse Sequence: s2pu1  
Solvent: cdc13  
Ambient temperature  
Operator: TCUser  
File: cdc13\_01  
Mercury-300BB "computer1"  
  
Relax. delay 1.000 sec  
Pulse 45.0 degrees  
Acq. time 1.998 sec  
Width 3000.3 Hz  
8 repetitions  
OBSERVE H1, 300.0452158 MHz  
DATA PROCESSING  
FT size 16384  
Total time 0 min, 35 sec

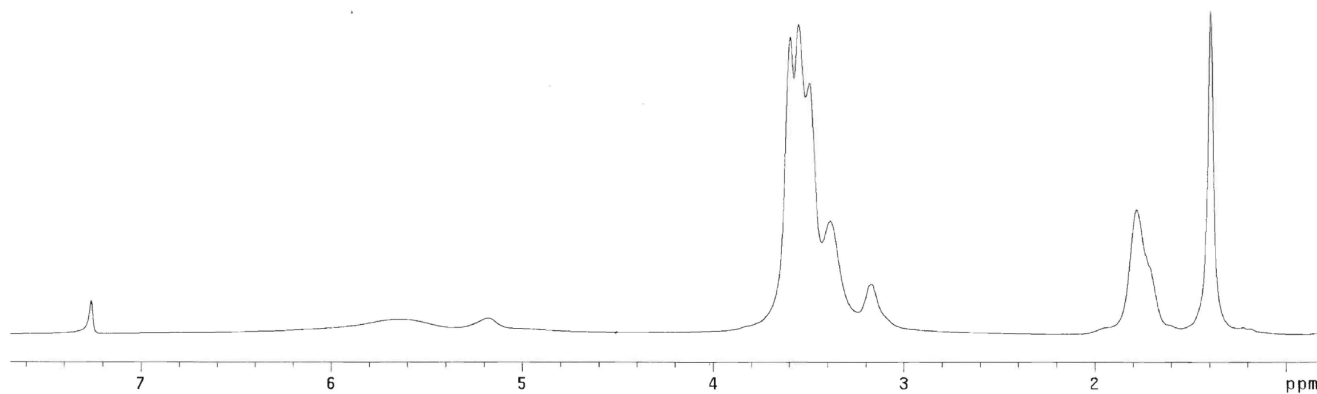

Figure S24. <sup>1</sup>H NMR spectrum of **11** (Boc-protected G13, 300 MHz, CDCl<sub>3</sub>).



L-Flex-G13-16384Boc  
Sample ID: s\_20120822\_44  
File: s\_20120822\_44/data/cdc13\_01.fid  
Pulse Sequence: s2pu1  
Solvent: cdc13  
Ambient temperature  
Operator: TCUser  
File: cdc13\_01  
Mercury-300BB "computer1"  
  
Relax. delay 1.000 sec  
Pulse 45.0 degrees  
Acq. time 1.301 sec  
Width 15083.0 Hz  
32 repetitions  
OBSERVE C13, 75.4464240 MHz  
DECOUPLE H1, 300.0467408 MHz  
Power 35 dB  
continuously on  
WALTZ-16 modulated  
DATA PROCESSING  
Line broadening 0.5 Hz  
FT size 65536  
Total time 6 hr, 42 min, 1 sec

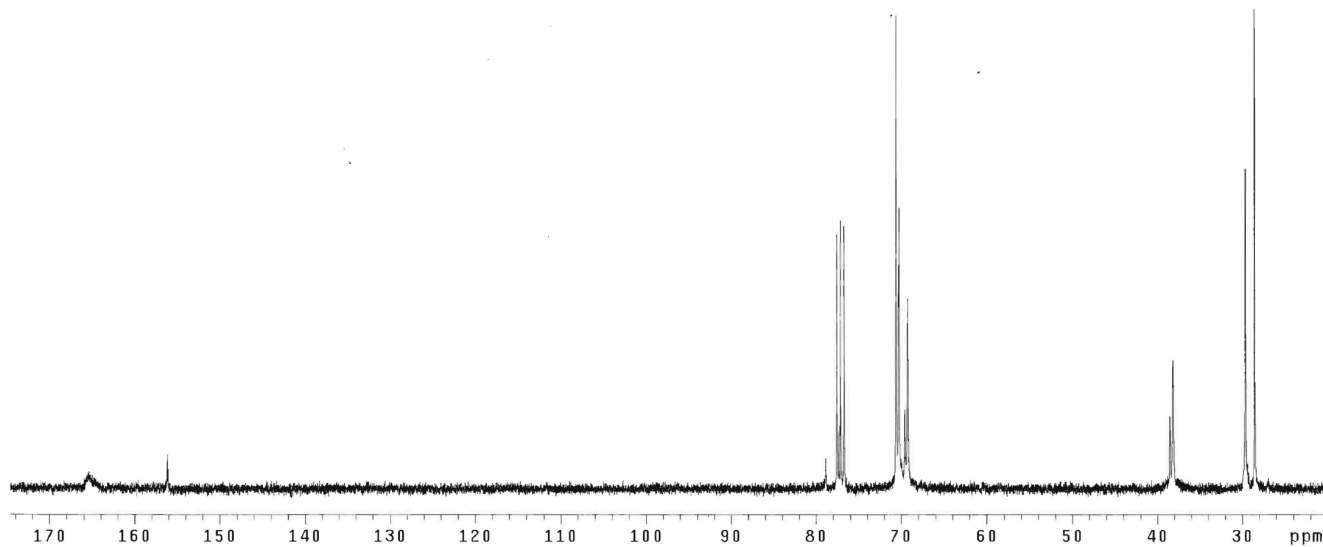

Figure S25.  $^{13}\text{C}$  NMR spectrum of **11** (Boc-protected G13, 75 MHz,  $\text{CDCl}_3$ ).

L-Flex-G13-16384NH2  
Sample ID: s\_20120827\_12  
File: s\_20120827\_12/data/cdcl3\_01.fid  
Pulse Sequence: s2pu1  
Solvent: cdcl3  
Ambient temperature  
Operator: TCUser  
File: cdcl3\_01  
Mercury-300BB "computer1"  
  
Relax. delay 1.000 sec  
Pulse 45.0 degrees  
Acq. time 1.998 sec  
Width 3000.3 Hz  
8 repetitions  
OBSERVE H1, 300.0452173 MHz  
DATA PROCESSING  
FT size 16384  
Total time 0 min, 35 sec

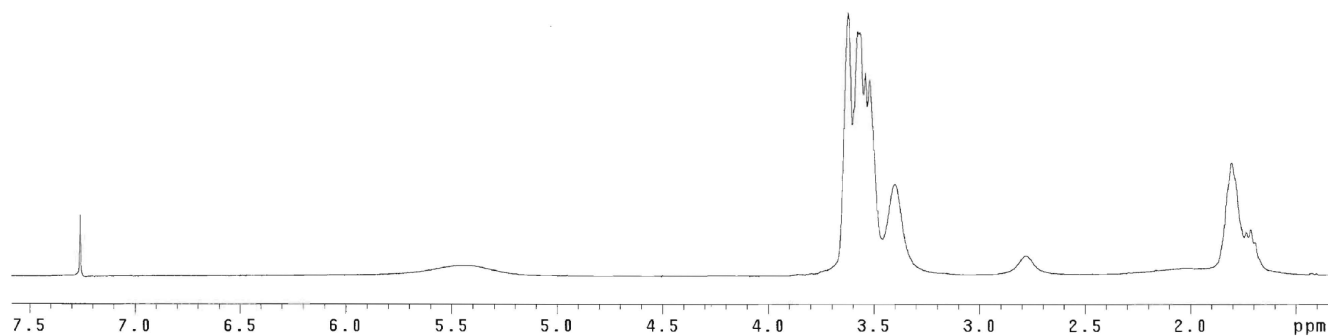

**Figure S26.**  $^1\text{H}$  NMR spectrum of **12** (deprotected G13, 300 MHz,  $\text{CDCl}_3$ ).

L-Flex-G13-16384NH2  
Sample ID: s\_20120827\_14  
File: s\_20120827\_14/data/cdc13\_01.fid  
Pulse Sequence: s2pul  
Solvent: cdc13  
Ambient temperature  
Operator: TCUser  
File: cdc13\_01  
Mercury-300BB "computer1"  
  
Relax. delay 1.000 sec  
Pulse 45.0 degrees  
Acq. time 1.301 sec  
Width 15083.0 Hz  
32 repetitions  
OBSERVE C13, 75.4464199 MHz  
DECOUPLE H1, 300.0467408 MHz  
Power 35 dB  
continuously on  
WALTZ-16 modulated  
DATA PROCESSING  
Line broadening 0.5 Hz  
FT size 65536  
Total time 13 hr, 23 min, 51 sec

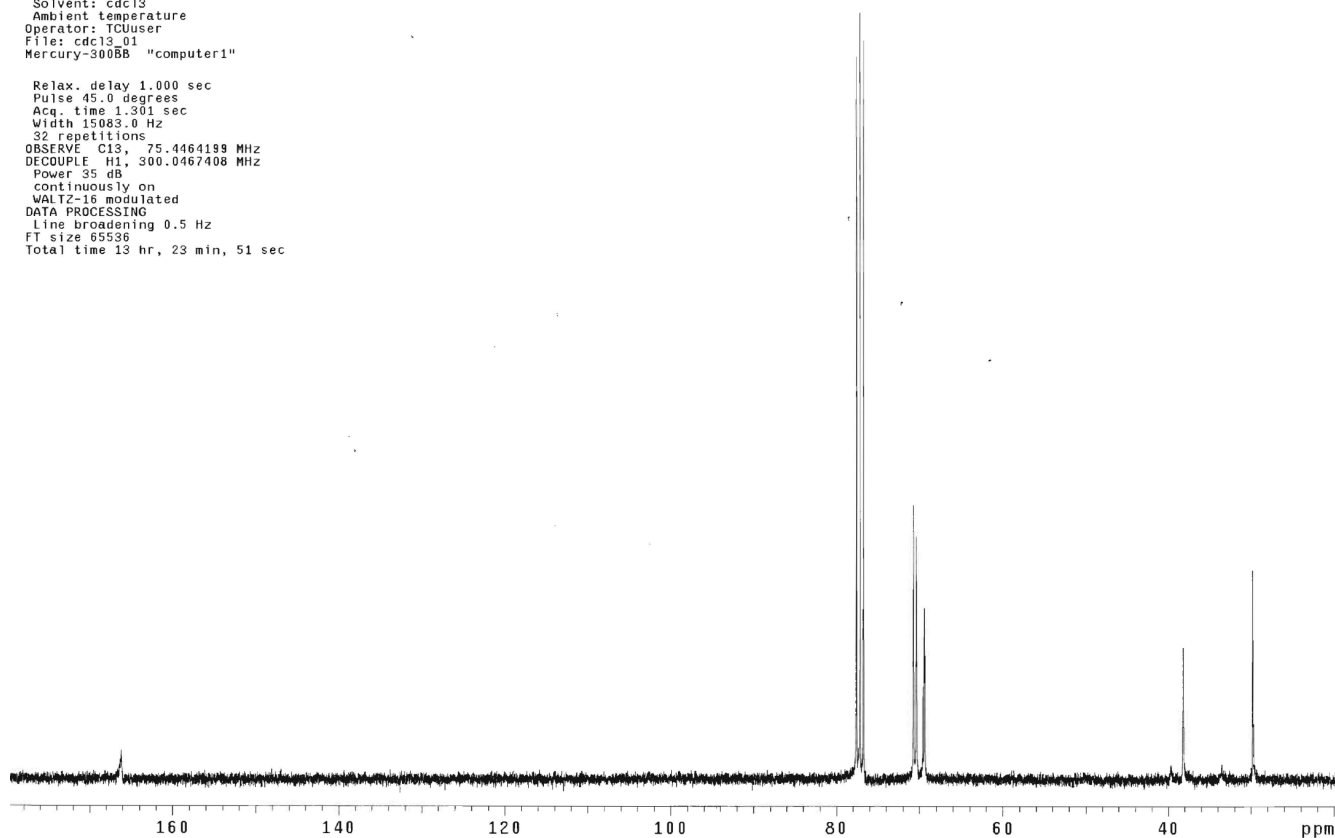

Figure S27.  $^{13}\text{C}$  NMR spectrum of **12** (deprotected G13, 75 MHz,  $\text{CDCl}_3$ ).

|                      |                       |                     |       |                        |              |                               |                     |
|----------------------|-----------------------|---------------------|-------|------------------------|--------------|-------------------------------|---------------------|
| <b>Sample Name</b>   | Bis(m BocTODA)triazin | <b>Position</b>     | P1-A1 | <b>Instrument Name</b> | Instrument 1 | <b>User Name</b>              |                     |
| <b>Inj Vol</b>       | -1                    | <b>Inj Position</b> |       | <b>Sample Type</b>     | Sample       | <b>IRM Calibration Status</b> | All Ions Missed     |
| <b>Data Filename</b> | Bis(m BocTODA)triazin | <b>ACQ Method</b>   |       | <b>Comment</b>         |              | <b>Acquired Time</b>          | 3/8/2012 3:08:31 PM |

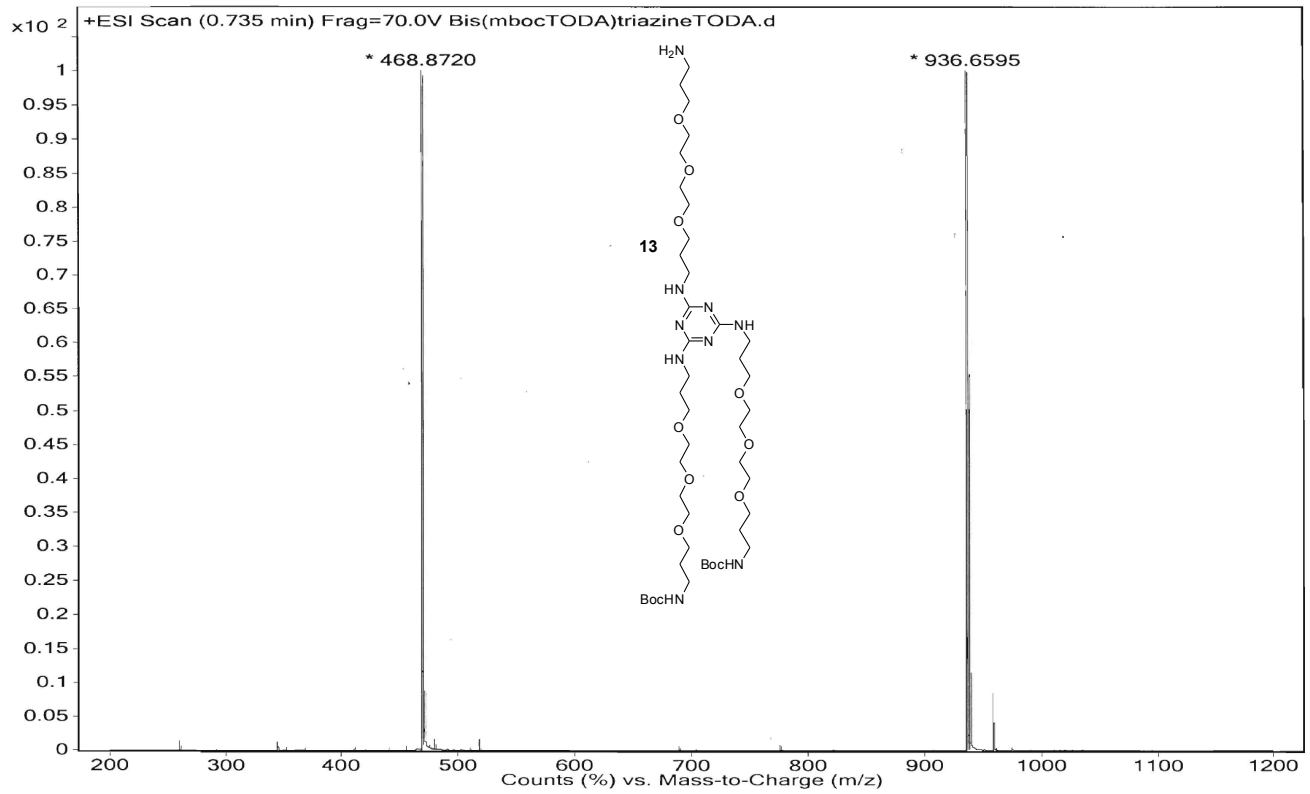

**Figure S28.** ESI-TOF mass spectrum of **13**.

bismBocTODATRZ-TODA

Archive directory: /export/home/TCUuser/vnmrsys/data  
Sample directory:  
File: PROTON

Pulse Sequence: s2pul  
Solvent: CDCl3  
Ambient temperature  
Mercury-300BB "mercuryplus300"

Relax. delay 1.000 sec  
Pulse 45.0 degrees  
Acq. time 1.994 sec  
Width 3602.3 Hz  
16 repetitions  
OBSERVE H1, 300.0452171 MHz  
DATA PROCESSING  
F1 size 16384  
Total time 1 min, 6 sec

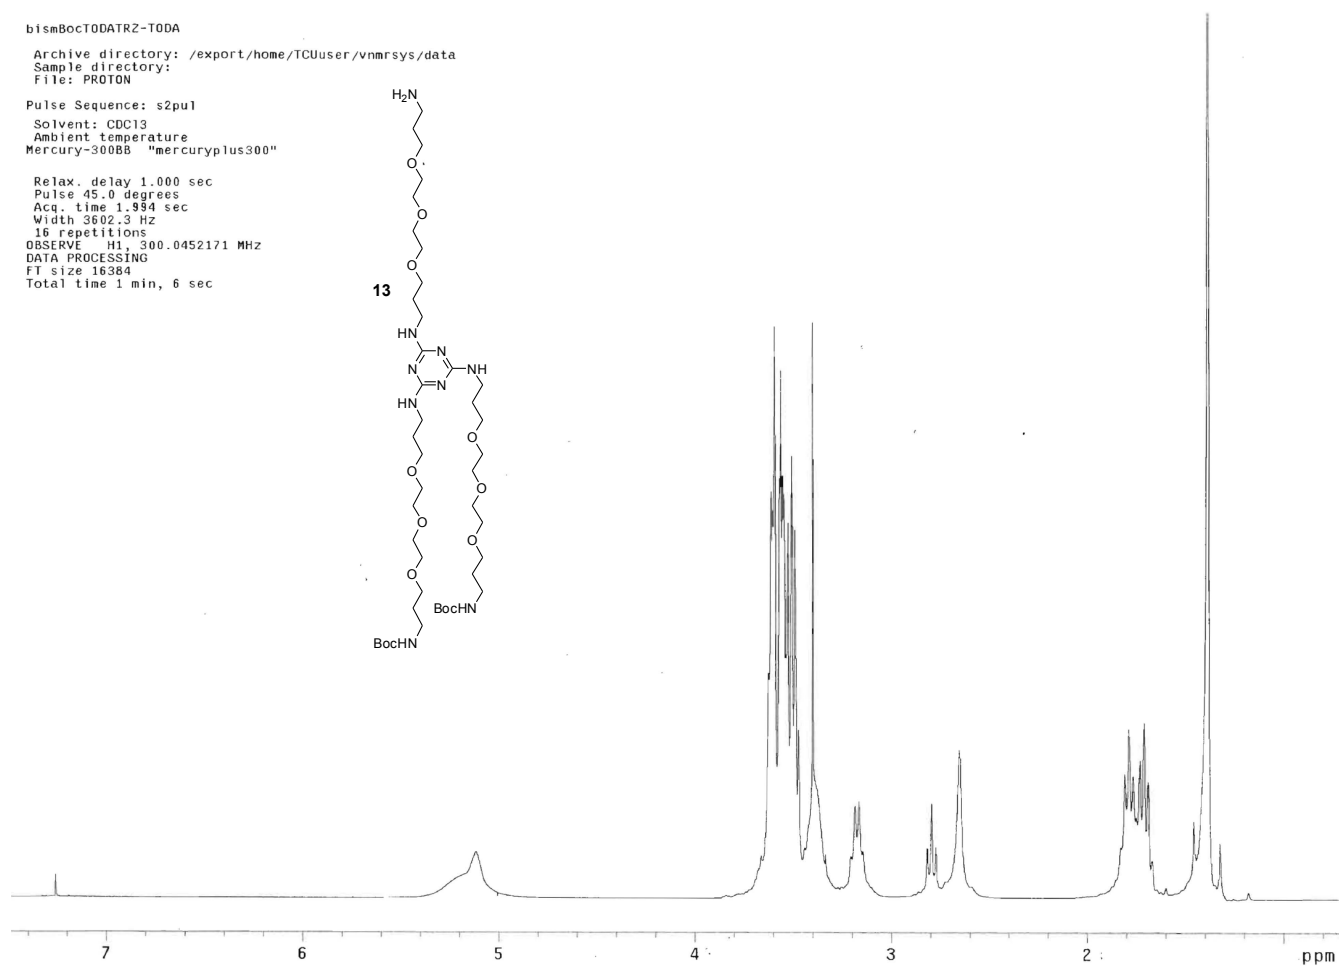

Figure S29. <sup>1</sup>H NMR spectrum of **13** (300 MHz, CDCl<sub>3</sub>).

BismBocTODA-TRZ-TODA

Archive directory: /export/home/TCUuser/vnmrsys/data  
Sample directory:  
File: CARBON

Pulse Sequence: s2pul

Solvent: CDCl3  
Ambient temperature  
Mercury-300BB "mercuryplus300"

Relax. delay 1.000 sec  
Pulse 45.0 degrees  
Acq. time 1.818 sec  
Width 15822.8 Hz  
448 repetitions  
OBSERVE C13, 75.4464235 MHz  
DECOUPLE H1, 300.0467409 MHz  
Power 35 dB  
continuously on  
WALTZ-16 modulated  
DATA PROCESSING  
Line broadening 1.0 Hz  
FT size 65536  
Total time 8 hr, 4 min, 43 sec

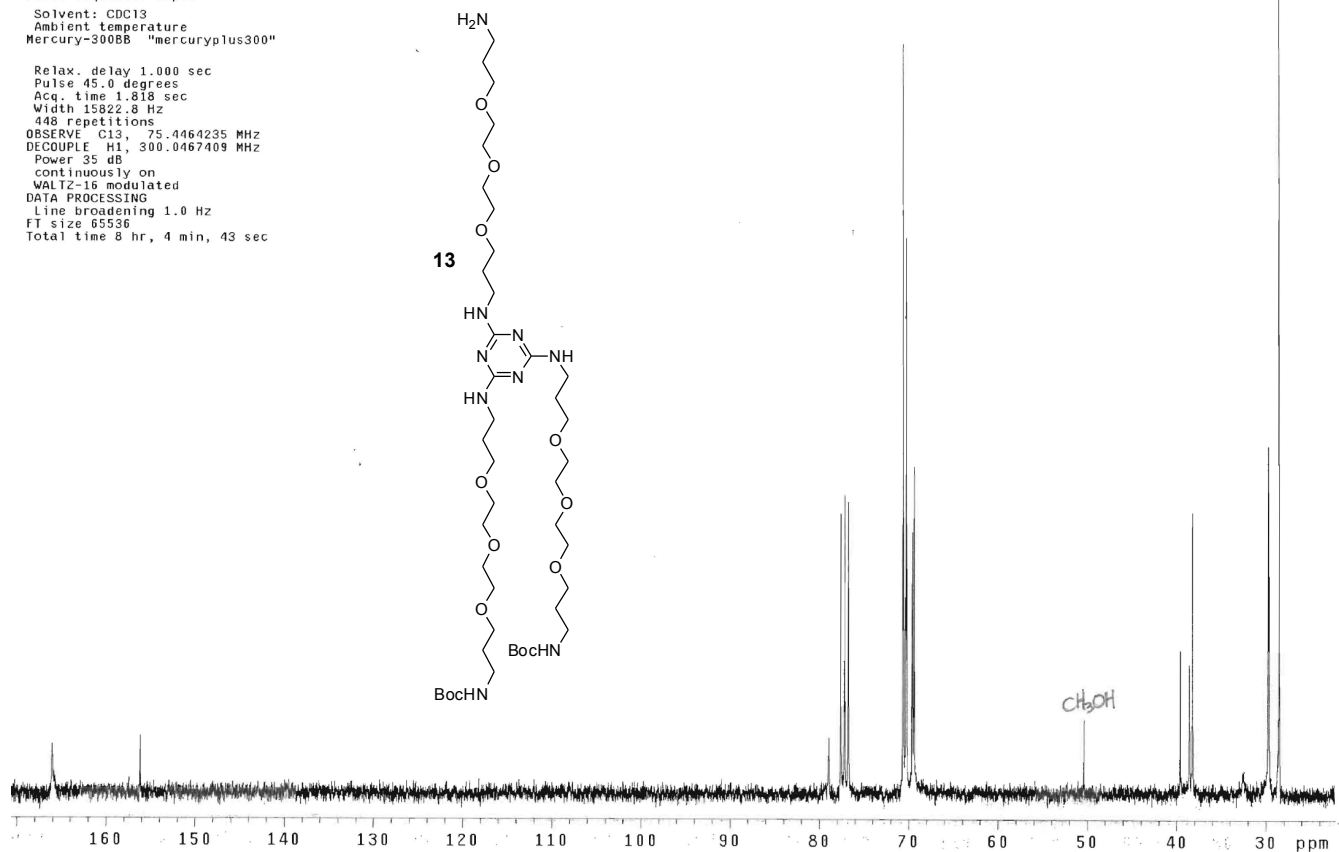

Figure S30. <sup>13</sup>C NMR spectrum of **13** (75 MHz, CDCl<sub>3</sub>).

|               |            |             |       |                 |              |                        |                      |
|---------------|------------|-------------|-------|-----------------|--------------|------------------------|----------------------|
| Sample Name   | L_MacroM   | Position    | P1-A1 | Instrument Name | Instrument 1 | User Name              |                      |
| Inj Vol       | -1         | InjPosition |       | SampleType      | Sample       | IRM Calibration Status | Some Ions Missed     |
| Data Filename | L_MacroM.d | ACQ Method  |       | Comment         |              | Acquired Time          | 3/16/2012 4:41:23 PM |

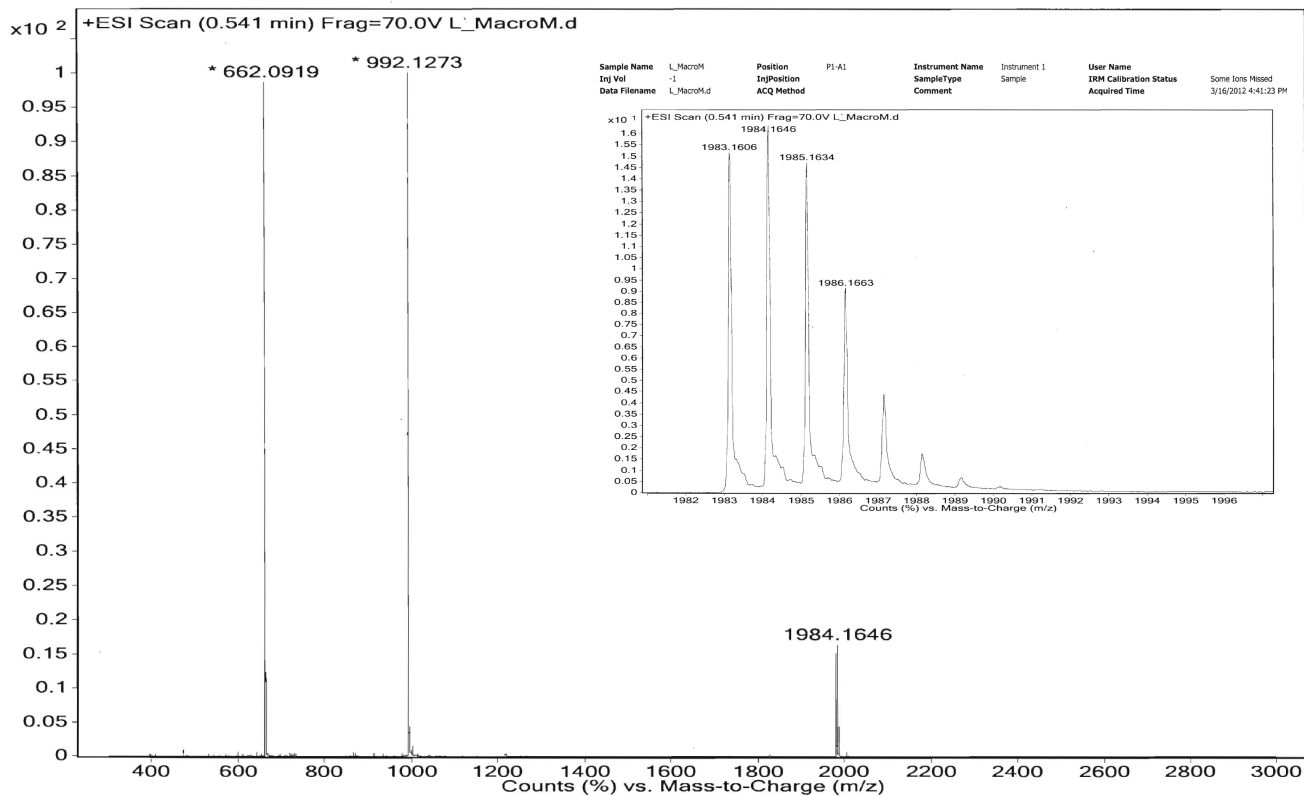

Figure S31. ESI-TOF mass spectrum of **14** (macromonomer).

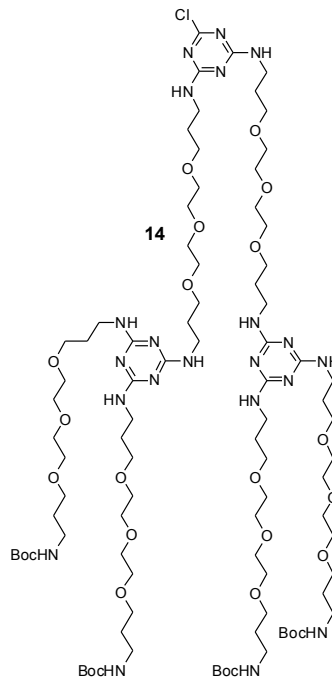

L-Flex-MacroM

Sample: pep3n1  
Sample ID: s\_20120815\_29  
File: s\_20120815\_29\data/cdc13\_01.fid

Pulse Sequence: s2pu1

Solvent: cdc13  
Ambient temperature  
Operator: TCUuser  
File: cdc13\_01  
Mercury-3005B "computer1"

Relax. delay 1.000 sec  
Pulse 45.0 degrees  
Acq. time 1.998 sec  
Width 3000.3 Hz  
3 repetitions  
OBSERVE H1, 300.0452177 MHz  
DATA PROCESSING  
FT size 16384  
Total time 0 min, 35 sec

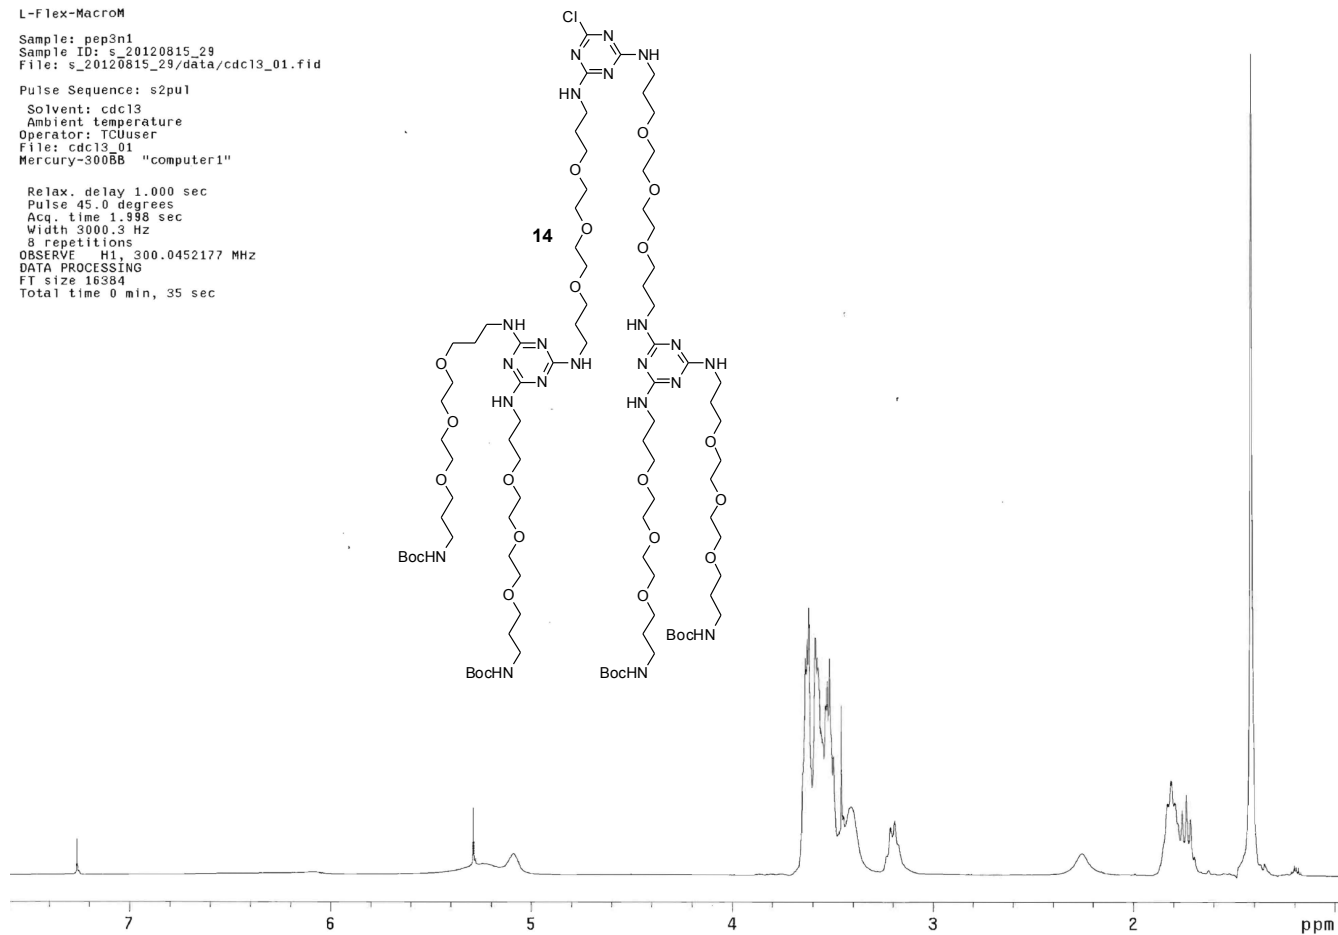

**Figure S32.** <sup>1</sup>H NMR spectrum of **14** (macromonomer, 300 MHz, CDCl<sub>3</sub>).



L-Flex-MacroM  
Sample: pep3n1  
Sample ID: s\_20120815\_31  
File: s\_20120815\_31/data/cdc13\_01.fid

Pulse Sequence: s2pu1  
Solvent: cdc13  
Ambient temperature  
Operator: TCUuser  
File: cdc13\_01  
Mercury-300BB "computer1"

Relax. delay 1.000 sec  
Pulse 45.0 degrees  
Acq. time 1.301 sec  
Width 15083.0 Hz  
16 repetitions  
OBSERVE C13, 75.4464272 MHz  
DECOUPLE H1, 300.0467408 MHz  
Power 35 dB  
continuously on  
WALTZ-16 modulated  
DATA PROCESSING  
Line broadening 0.5 Hz  
FT size 65536  
Total time 41 min, 42 sec

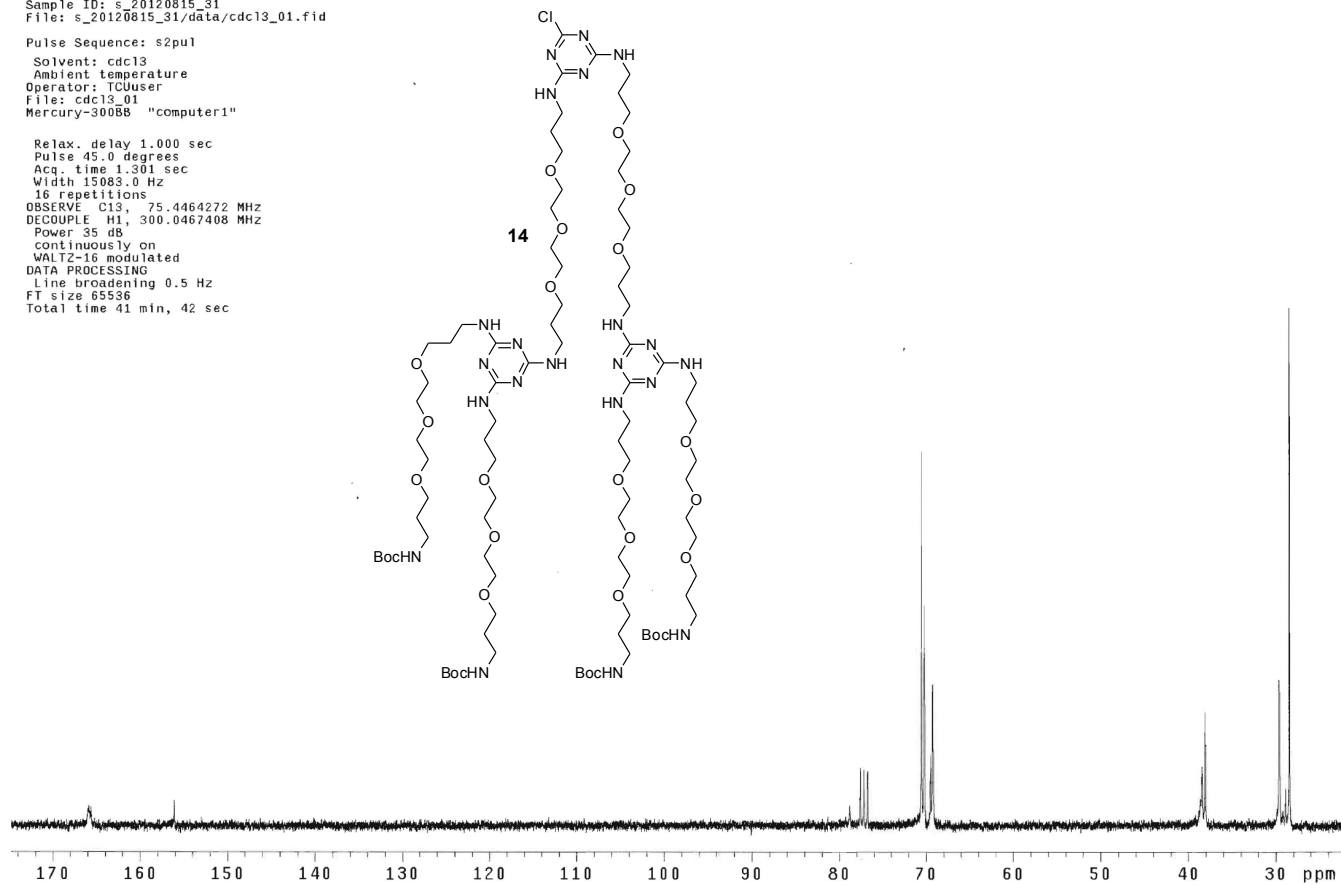

Figure S33.  $^{13}\text{C}$  NMR spectrum of **14** (macromonomer, 75 MHz,  $\text{CDCl}_3$ ).

|                      |                |                    |       |                        |              |                               |                     |
|----------------------|----------------|--------------------|-------|------------------------|--------------|-------------------------------|---------------------|
| <b>Sample Name</b>   | L-macroM-PPA   | <b>Position</b>    | P1-A1 | <b>Instrument Name</b> | Instrument 1 | <b>User Name</b>              |                     |
| <b>Inj Vol</b>       | -1             | <b>InjPosition</b> |       | <b>SampleType</b>      | Sample       | <b>IRM Calibration Status</b> | Some Ions Missed    |
| <b>Data Filename</b> | L-macroM-PPA.d | <b>ACQ Method</b>  |       | <b>Comment</b>         |              | <b>Acquired Time</b>          | 3/21/2012 3:23:54 P |

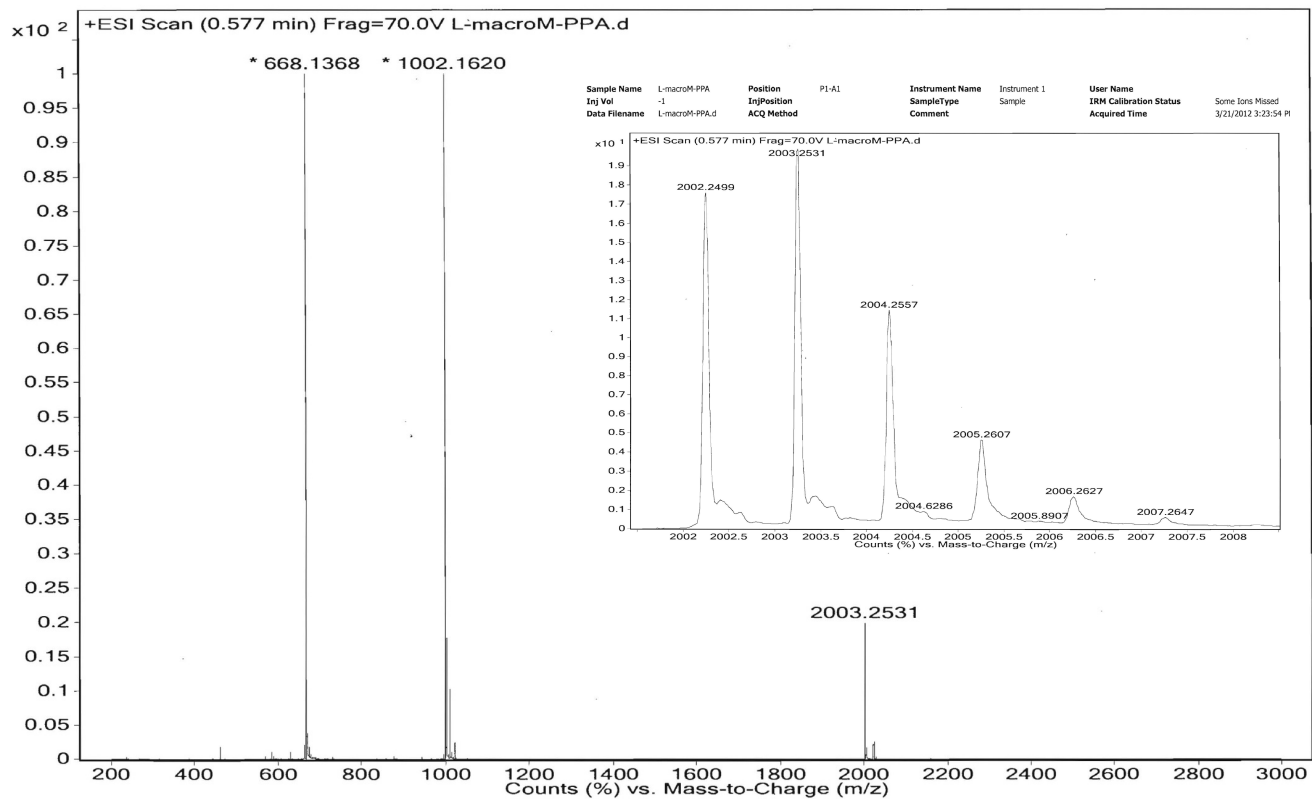

Figure S34. ESI-TOF mass spectrum of **15** (Boc-protected G1).

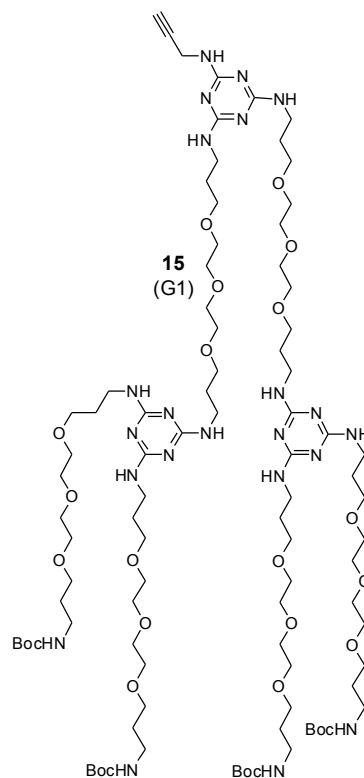

L-macroM-PPA

Archive directory: /export/home/TCUser/vnmrsys/data  
Sample directory:

Pulse Sequence: s2pu1

Solvent: CDCl3

Ambient temperature

File: Apj1

Mercury-300BB "mercuryplus300"

Relax. delay 1.000 sec

Pulse 45.0 degrees

Acq. time 1.993 sec

Width 3003.0 Hz

16 repetitions

OBSERVE H1, 300.0452195 MHz

DATA PROCESSING

FT size 16384

Total time 1 min, 5 sec

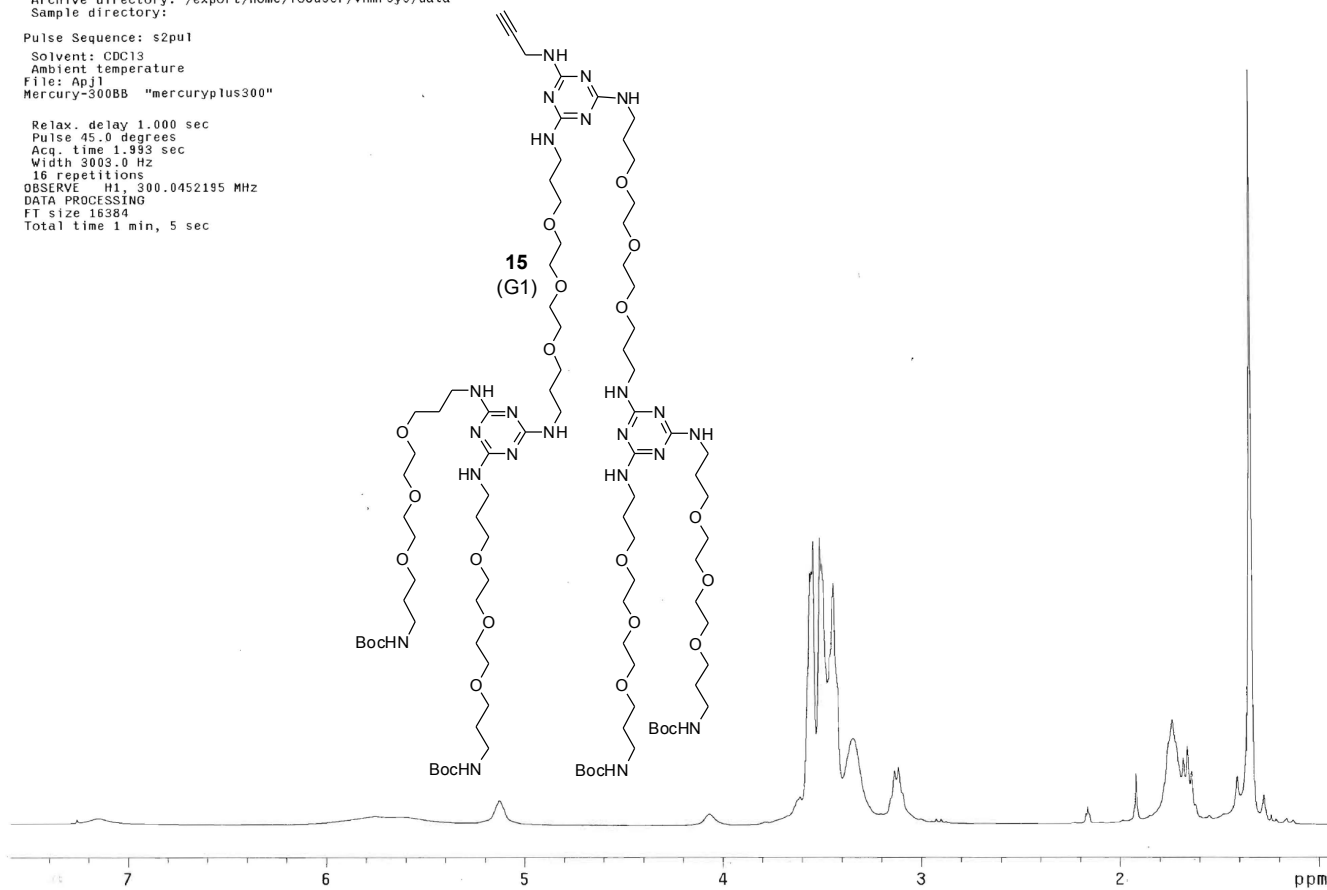

Figure S35. <sup>1</sup>H NMR spectrum of **15** (Boc-protected G1, 300 MHz, CDCl<sub>3</sub>).

L-macroM-PPA

Archive directory: /export/home/TCUUser/vnmrsys/data  
Sample directory:  
File: CARBON

Pulse Sequence: s2pu1

Solvent: CDCl3  
Ambient temperature  
Mercury-300BB "mercuryplus300"

Relax. delay 1.000 sec  
Pulse 45.0 degrees  
Acq. time 1.818 sec  
Width 15822.8 Hz  
526 repetitions  
OBSERVE C13, 75.4464317 MHz  
DECOUPLE H1, 300.0467409 MHz  
Power 35 dB  
continuously on  
WALTZ-16 modulated  
DATA PROCESSING  
Line broadening 1.0 Hz  
FT size 65536  
Total time 82 hr, 17 min, 23 sec

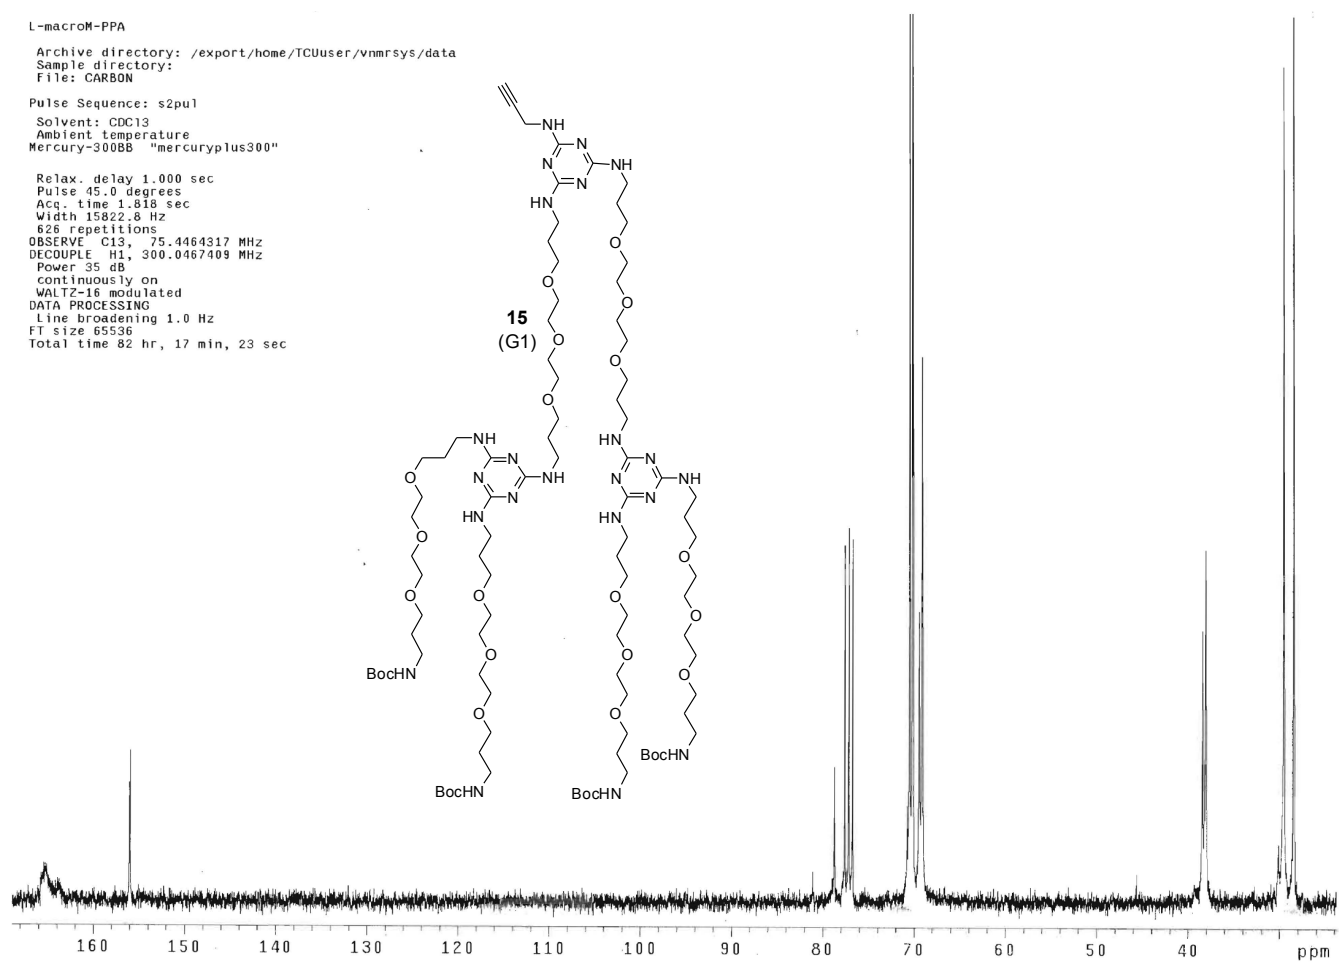

Figure S36. <sup>13</sup>C NMR spectrum of **15** (Boc-protected G1, 75 MHz, CDCl<sub>3</sub>).

|               |                    |             |       |                 |              |                        |                      |
|---------------|--------------------|-------------|-------|-----------------|--------------|------------------------|----------------------|
| Sample Name   | L-macroM-PPA-Dep   | Position    | P1-A1 | Instrument Name | Instrument 1 | User Name              |                      |
| Inj Vol       | -1                 | InjPosition |       | SampleType      | Sample       | IRM Calibration Status | Some Ions Missed     |
| Data Filename | L-macroM-PPA-Dep.d | ACQ Method  |       | Comment         |              | Acquired Time          | 3/23/2012 10:07:42 J |

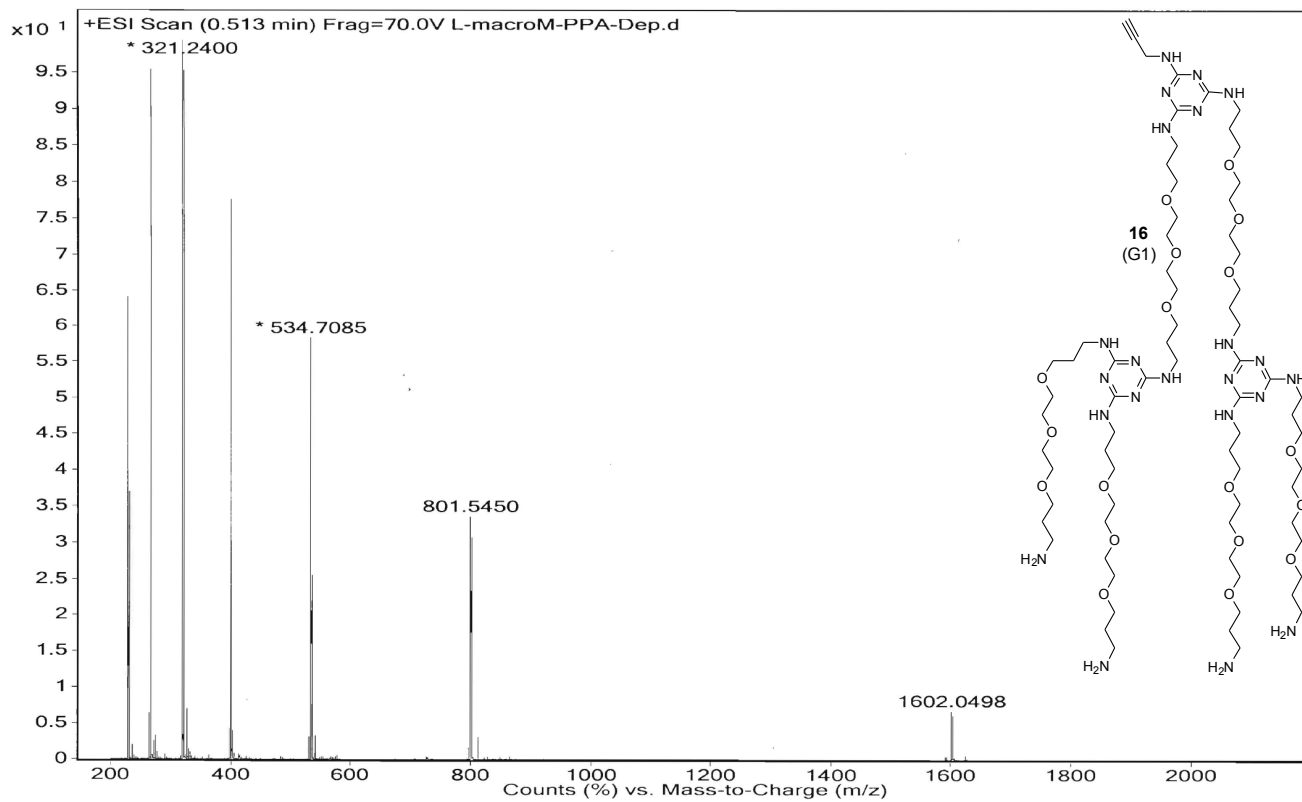

Figure S37. ESI-TOF mass spectrum of **16** (deprotected G1).

Dep-L-macrom-PPA

Archive directory: /export/home/TCUuser/vnmrsys/data  
Sample directory:  
File: PROTON

Pulse Sequence: s2pu1  
Solvent: CDCl3  
Ambient temperature  
Mercury-300BB "mercuryplus300"

Relax. delay 1.000 sec  
Pulse 45.0 degrees  
Acq. time 1.984 sec  
Width 3602.3 Hz  
16 repetitions  
OBSERVE H1, 300.0452193 MHz  
DATA PROCESSING  
F1 size 16384  
Total time 1 min, 6 sec

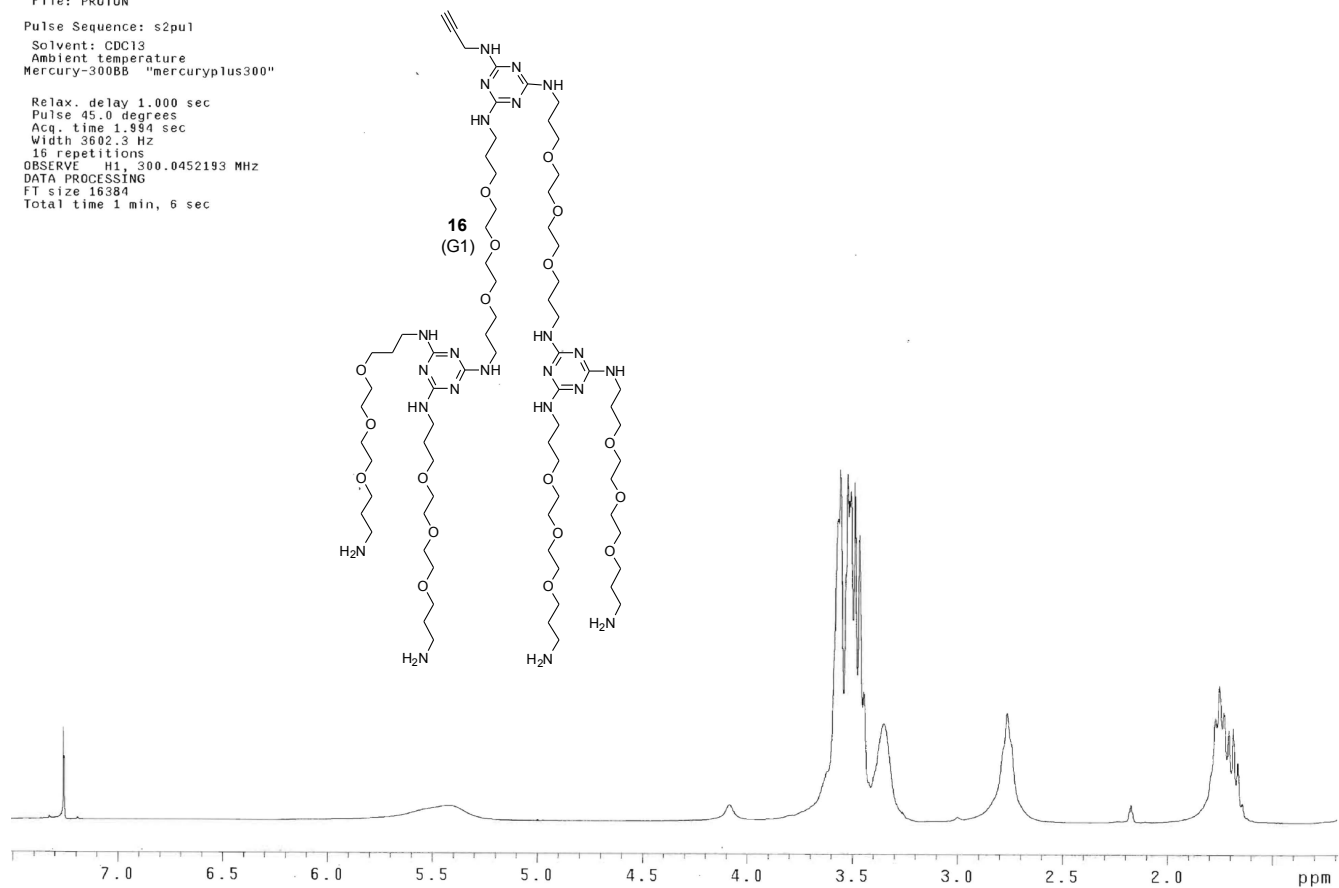

**Figure S38.** <sup>1</sup>H NMR spectrum of **16** (deprotected G1, 300 MHz, CDCl<sub>3</sub>).

Dep-L-macroM-PPA

Archive directory: /export/home/TCUser/vnmrsys/data  
Sample directory:  
File: CARBON

Pulse Sequence: s2pu1  
Solvent: CDCl3  
Ambient temperature  
Mercury-300BB "mercuryplus300"

Relax. delay 1.000 sec  
Pulse 45.0 degrees  
Acq. time 1.818 sec  
Width 15822.8 Hz  
650 repetitions  
OBSERVE C13, 75.4464293 MHz  
DECOUPLE H1, 300.0467409 MHz  
Power 35 dB  
continuously on  
WALTZ-16 modulated  
DATA PROCESSING  
Line broadening 1.0 Hz  
FI size 65536  
Total time 8 hr, 14 min, 9 sec

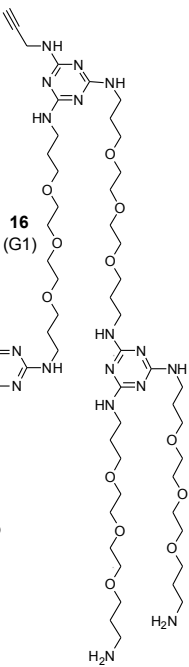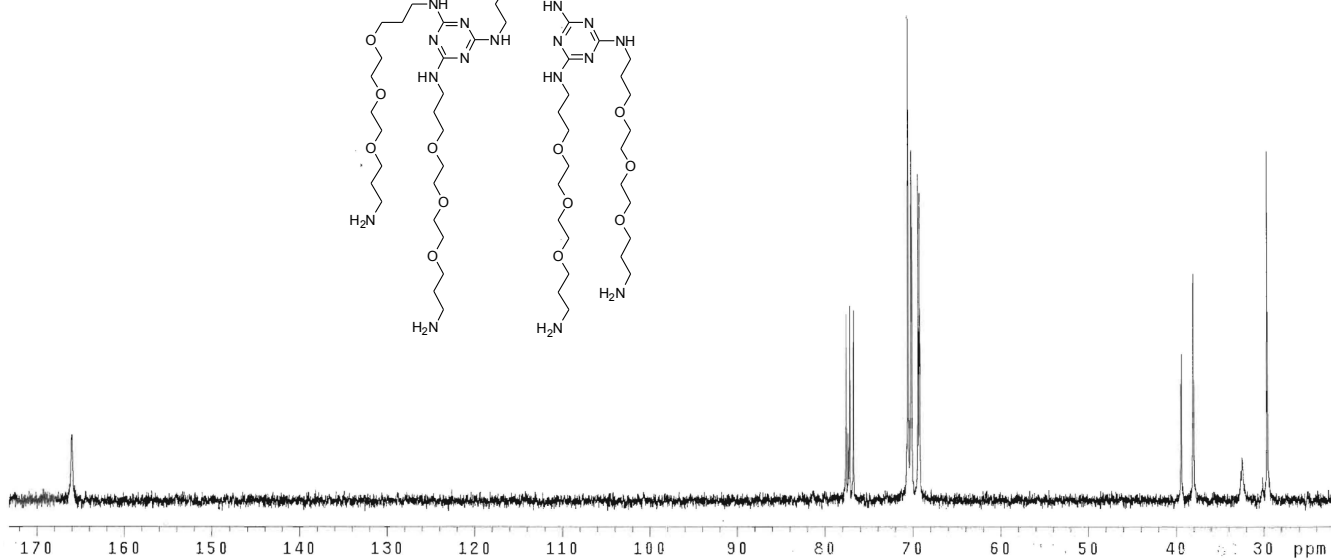

Figure S39. <sup>13</sup>C NMR spectrum of 16 (deprotected G1, 75 MHz, CDCl<sub>3</sub>).

## NMR Analysis

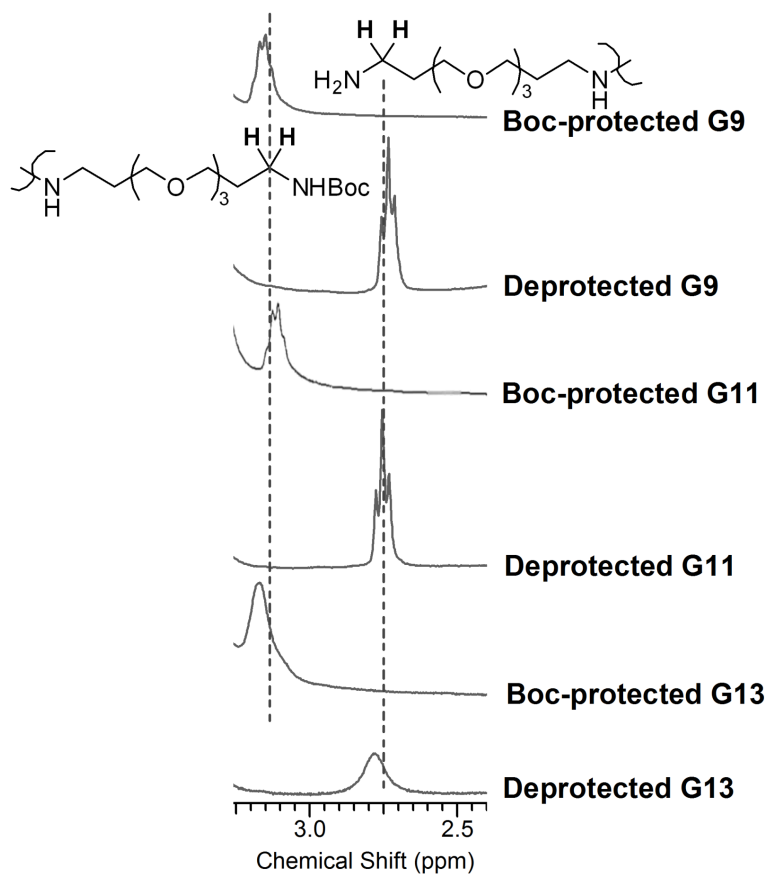

**Figure S40.** <sup>1</sup>H NMR Spectra of the large generation dendrimers (G9-G13) display the finger print region for monitoring the reiterative addition and deprotection: The vicinal proton signals of NHBoc groups appear around at 3.2 ppm, while the vicinal proton signals of NH<sub>2</sub> groups appear around at 2.75 ppm.



## HPLC Analysis

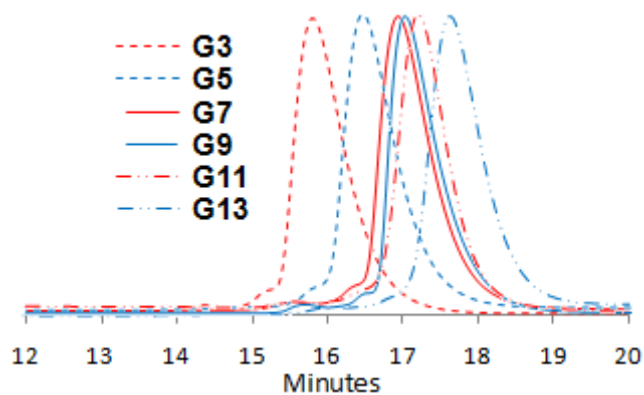

**Figure S41.** HPLC traces of the dendrimers (G3-G13). For analytic HPLC of the dendrimers, a ZORBAX 300SB-C8 column (1.0 x 150 mm, 3.5  $\mu$ m) was used with a gradient elution: 70% A to 30% A over 20 min and then keep 30% A (A = water with 0.1% TFA, B = acetonitrile with 0.1% TFA) with a flow rate of 80  $\mu$ L/min. UV detection was performed at 230 nm.

## Transmission Electron Microscopy

**Experimental.** Transmission electron microscopy micrographs (TEM) were recorded on a Tecnai 12 Bio Twin instrument operating at a 120 kV accelerating voltage. Samples (dendrimer: 1 mg mL<sup>-1</sup> in Milli-Q water, CCMV: 50 mg L<sup>-1</sup> in 10 mM NaAc, 1 mM EDTA, 1 mM NaN<sub>3</sub>, pH 5) were prepared on formvar carbon-coated copper grids by placing a 3 μL drop of the sample solution on the grid. The sample drop was left standing for 1 min after which time the excess solution was blotted away with filter paper. Samples were negatively stained by applying 3 μL of stain (0.5% uranyl acetate in Milli-Q water) onto the grid and removing the excess stain with filter paper after 15 s. The samples were dried under air flow for at least 5 min before imaging.

Cryo-TEM samples were prepared from the same aqueous (dendrimer) or buffer (virus) solutions. Prior to sample deposition the TEM grids (Quantifoil R 3.5/1, holey carbon film, Cu 200 mesh) were treated with Gatan Solarus 950 plasma system. 3 μL of sample was placed on the grid, which was consecutively blotted for 1-2 s (100 % relative humidity, -2 mm blot offset), with Fei Vitrobot Mk3 followed by immediate vitrification with a mixture of liquid ethane and propane (~1:1) at -180 °C. Vitrified samples were cryo-transferred to the microscope. Images were obtained with a JEOL JEM-3200 FSC field emission cryo electron microscope operating at a 300 kV accelerating voltage and specimen temperature of 86 K.

## Dynamic Light Scattering

Measurements of dynamic light scattering (DLS) were performed at  $25.0 \pm 0.1$  °C. All dendrimer samples were filtered through a 0.2 mm filter (Anotop 10, Whatman) and placed in a test tube. The experiments were performed on a light scattering apparatus built using the following main components: He-Ne laser (35 mW, 632.8 nm, Coherent Radiation), manual goniometer and thermostat (Photocor Instruments), multi-tau correlator, APD detector and software (PD4042, Precision Detectors).<sup>1,2</sup> All measurements were performed at a scattering angle of 90°. The dynamic-light-scattering correlation functions were analyzed using a regularization algorithm (Precision Deconvolve 32, Precision Detectors). Light-scattering distributions were bimodal. The calculated z-average diffusion coefficient,  $D$ , corresponds to the peak at low apparent radii (fast diffusion mode).<sup>2,3</sup> For dilute solutions, diffusion coefficient values can be converted into the corresponding hydrodynamic radius,  $R_h$ , using the Stokes-Einstein equation:  $R_h = k_B T / (6\pi\eta D)$  for a sphere,<sup>4</sup> where  $k_B$  is the Boltzmann constant,  $T = 298.2$  K the absolute temperature, and  $\eta$  the corresponding viscosity of water. The viscosity value of water,  $\eta = 0.890 \times 10^{-3} \text{ kg m}^{-1} \text{ s}^{-1}$ ,<sup>5</sup> was used to calculate  $R_h$ .

For **G9** and **G11**, DLS measurements were performed in phosphate buffered saline (PBS) solutions. For **G13**, filtering of phosphate buffered saline solutions virtually removed all dendrimer material. Thus, DLS measurements were performed in NaCl 0.01 M and water. Our results are summarized in **Table S1**. Representative light-scattering distributions for G9, G11 and G13 are shown in **Figure S42**.

**Table S1.** Diffusion coefficients and calculated hydrodynamic radii. <sup>a</sup> concentration values do not take into account dendrimer material removed by filtering. <sup>b</sup> errors are standard deviations. <sup>c</sup> pH=7.4

| Sample description <sup>a</sup>          | $D/10^{-9} \text{ m}^2 \text{ s}^{-1}$ | $R_h/\text{nm}$ |
|------------------------------------------|----------------------------------------|-----------------|
| G3 3.9 g/L in PBS                        | $0.124 \pm 0.01$ <sup>b</sup>          | -               |
| G3 7.0 g/L in PBS                        | $0.117 \pm 0.01$                       | -               |
| G3 9.0 g/L in PBS                        | $0.112 \pm 0.01$                       | -               |
| G3 0.0 g/L in PBS <sup>c</sup>           | $0.132 \pm 0.01$                       | $1.85 \pm 0.02$ |
| G5 4.9 g/L in PBS                        | $0.0614 \pm 0.006$                     | $3.99 \pm 0.04$ |
| G7 1.0 g/L in PBS                        | $0.0358 \pm 0.002$                     | $6.85 \pm 0.03$ |
| G9 1.0 g/L in PBS                        | $0.0229 \pm 0.003$                     | $10.7 \pm 0.2$  |
| G11 0.48 g/L in PBS                      | $0.0168 \pm 0.002$                     | $14.6 \pm 0.2$  |
| G13 0.25 g/L in NaCl 0.01 M <sup>d</sup> | $0.0162 \pm 0.005$                     | $15.1 \pm 0.4$  |
| G13 0.11 g/L in water <sup>d</sup>       | $0.0187 \pm 0.003$                     | -               |
| G13 0.40 g/L in water <sup>d</sup>       | $0.0207 \pm 0.006$                     | -               |
| G13 2.0 g/L in water <sup>d</sup>        | $0.0317 \pm 0.033$                     | -               |

**Comments.** Diffusion coefficients of **G13** in water were found to be higher than that in NaCl 0.01 M. This can be explained by considering dendrimer charge. In the absence of electrostatic screening, dendrimer diffusion coefficients are expected to be higher than their intrinsic Brownian mobilities.<sup>6</sup> Thus, the Stokes-Einstein equation was not applied in this case.

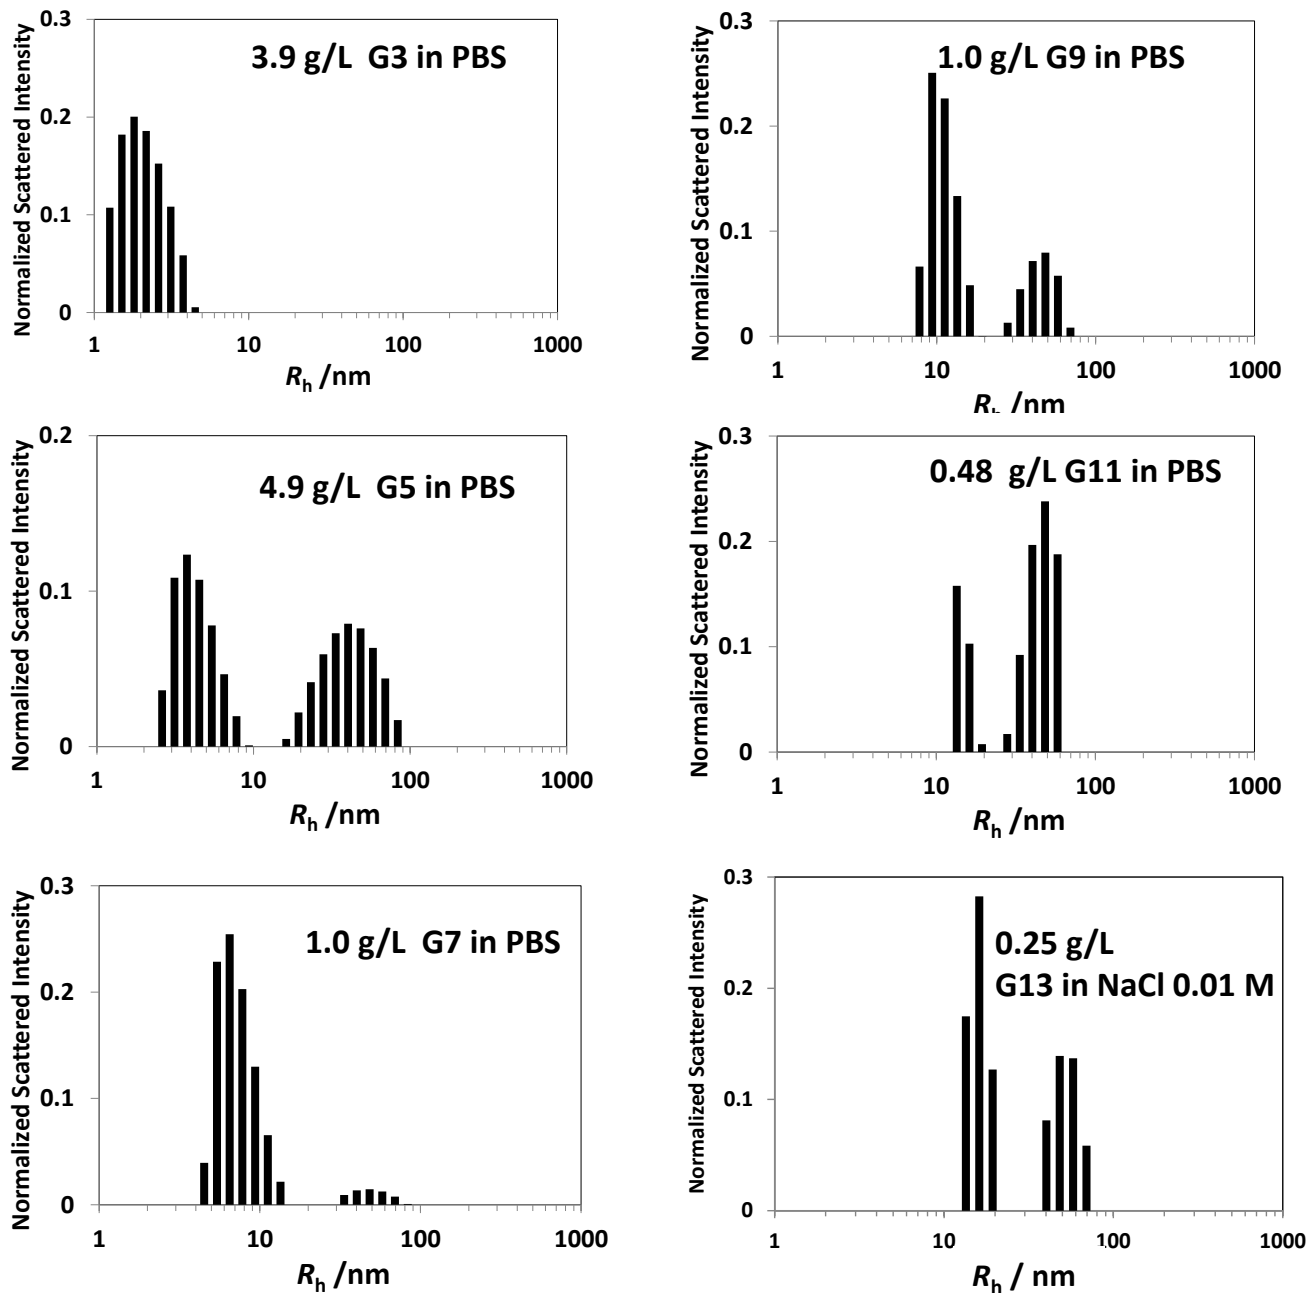

**Figure S42.** Normalized scattered-intensity distributions.

## References

- 1 Lomakin, A.; Teplow, D.B.; Benedek, G.B. *Meth. Mol. Biol.* **2005**, *299*, 153–174.
- 2 Zhang H.; Annunziata, O. , *J. Phys. Chem. B* **2005**, *112*, 3633-3643.
- 3 Schmitz, K. S. *Introduction to Dynamic Light Scattering by Macromolecules* (Academic Press, San Diego, 1990), pp 77-98.
- 4 Tanford, C. *Physical Chemistry of Macromolecules*; Wiley: New York, 1961, p. 356.
- 5 Kestin, J.; Sokolov, M.; Wakeham, W.A. *J. Phys. Chem. Ref. Data* **1978**, *7*, 941-948.
- 6 Schmitz, K. S. *Introduction to Dynamic Light Scattering by Macromolecules* (Academic Press, San Diego, 1990), pp 205-214.

## ATOMIC FORCE MICROSCOPY

**Sample Preparation.** For AFM analysis on air, **G13** dendrimers (2 mg/ml water solution filtered through the 0.2  $\mu\text{m}$  filter (Whatman GD/X)) were dropped (5  $\mu\text{l}$ ) on freshly cleaved circular mica disc (diameter 1 cm) and solution was let to evaporate at ambient conditions (30 min.). Samples for liquid AFM were prepared by drop casting of **G13** solution (15  $\mu\text{l}$ ) of the same composition on mica disc fixed in liquid measurement cell. After 10 minutes of incubation (without drying) the surface of mica was gently layered with 1ml of ultrapure (Milli-Q) water and AFM analysis performed.

**AFM analysis.** Atomic force microscopy analysis was performed with an AFM Integra Probe Nanolaboratory (NT-MDT, Russia). Analysis of dry samples was performed in semi-contact mode with a 100 $\times$ 100  $\mu\text{m}$  closed-loop scanner (scanning by sample). Samples were analyzed by high accuracy noncontact composite (HA\_NC) ETALON silicon tip cantilevers (NT-MDT, Russia) with a typical resonant frequency of 280 kHz, a tip radius of 10 nm and a force constant of 11.5 N/m in air, and at ambient temperature and humidity. Analysis of hydrated **G13** was performed in liquid cell (total volume 1ml) fixed on 100 $\times$ 100  $\mu\text{m}$  closed-loop scanner (scanning by sample) in soft contact mode AFM. Triangular silicon nitride cantilevers (NanoAndMore Inc.) with tip radius bellow 10 nm and force constant 0.08 N/m were used. A scan rate of 0.5–1 Hz was used for the best resolution. Data were collected from at least three different samples, with two different tips and in a minimum of 10 different positions on each sample.

**Image processing and height ( $Z_{\text{max}}$ ) analysis.** The images were analyzed by Scanning Probe Image Processor software (Image Metrology A/S, Denmark). Raw images were corrected for the tilting of the sample stage and zero leveled based on the dominant height value in the distribution histogram. No other image filtering was used. Objects (at least 100 entities) were analyzed for the  $Z_{\text{max}}$  (the maximum Z value of all points inside the shape contour) by threshold method using embedded grain analysis module and values obtained presented as height distribution histogram.

**Comments.** Liquid AFM analysis is very precise method suitable to measure the diameter ( $Z_{\text{max}}$  value) of symmetric (spherical) hydrated nanoobjects as are dendrimers. The important prerequisite for such analysis in liquid is the immobilization of sample on atomically flat surface. Fortunately, the **G13** triazine dendrimers are positively charged at neutral pH and therefore able to be immobilized electrostatically on negatively charged mica surface. AFM analysis of the hydrated dendrimers revealed the predominant presence ( $\approx 66\%$ ) of subpopulation of **G13** with dimensions within the

interval 29-36 nm (see histogram **Fig S43**) with average  $Z_{\max} = 31.5 \pm 1.9$  nm ( $n = 93$ ). Although there were present also other subpopulations of dendrimers in lower range than expected (lower or incomplete generations), their overall percentage is much lower compared to largest subpopulation in histogram. Based on the HPLC, the purity of sample has been predicted more than 95%. We therefore expect that the presence of **G13** (largest subpopulation) will be significantly higher than  $\approx 66\%$  as obtained from AFM analysis. **G13** tend to aggregate compared to lower generations (as observed by DLS). This aggregation is further increased during the AFM sample preparation (preconcentration step on mica surface). The relative proportion of **G13** could be underestimated compared to its presence in solution due to aggregation.

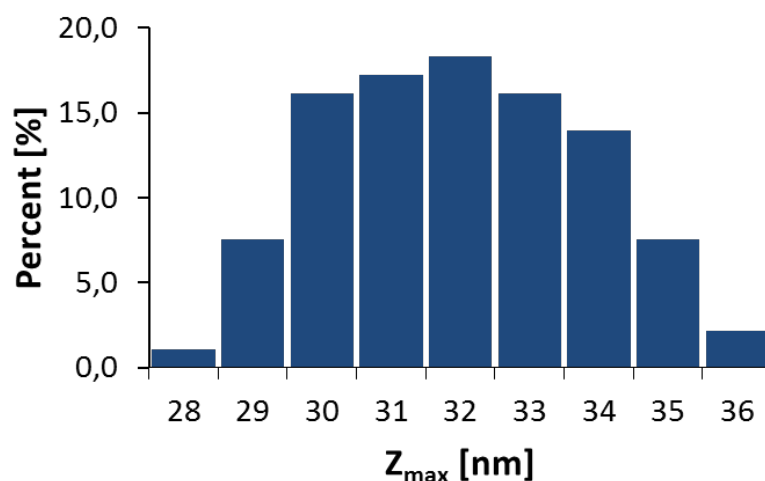

**Fig. S43.** Histogram of  $Z_{\max}$  distributions ( $n = 93$ ) of **G13** dendrimers as obtained by AFM in liquid

**Fig. S45** shows AFM analysis of **G13** on air (dry sample). Based on the cross section profile and histogram is apparent, that the desiccation process leads to significant changes in volume and  $Z_{\max}$  values of dendrimers, absorbed electrostatically on the surface of mica. Since the diameter of the dendrimers measured on dry samples by TEM is approx. 25-30 nms (measured at x-y scale), we may assume that the dendrimer shrinks predominantly in the Z-scale (average final value  $9.8 \pm 1.9$  nm) towards the mica surface resulting in disc shape. Volume and  $Z_{\max}$  changes can be explained by gradual loss of water molecules during the drying process and possibly also by attractive forces between the negatively charged mica and positively charged amino groups of dendrimer which may deform the expected spherical shape of **G13**. The partial aggregation of **G13** observed on **Fig. S44** is the most probably the result of the preconcentration of dendrimers on mica surface during the drying process. The extent of the volume changes observed suggests natural high hydration state of internal space of dendrimer.

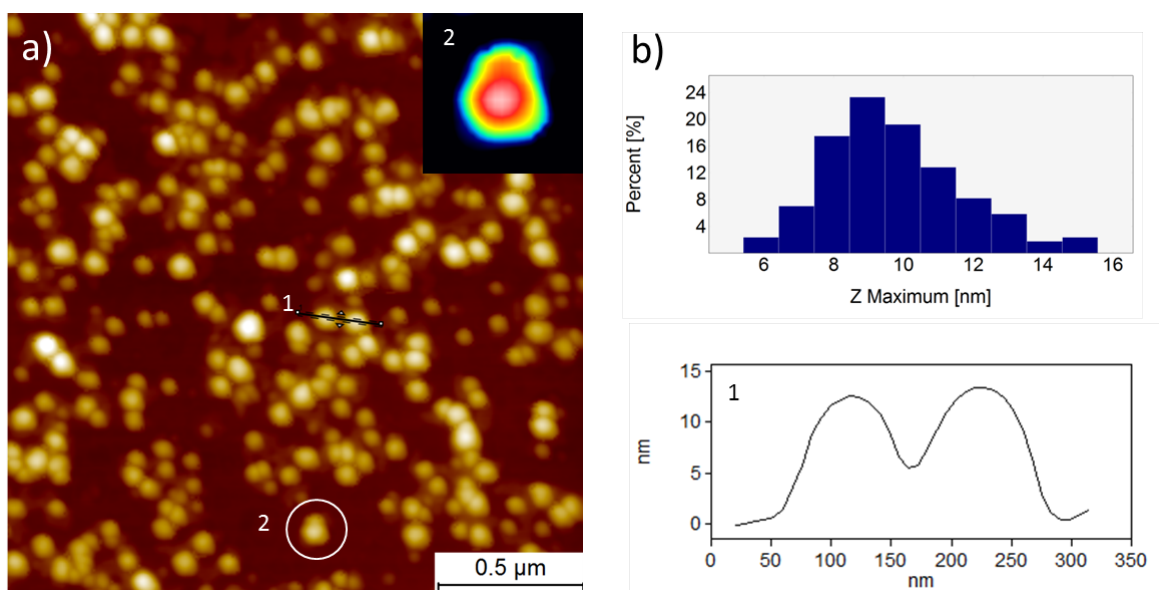

**Figure S44.** Atomic force microscopy (AFM) analysis of **G13** on air (dry sample). a) **G13** imaged on mica surface. Cross section profile (average of 3 lines) of two dendrimers (marked 1) is shown on the right panel. Inset: close view of **G13** dendrimer marked by circle (numbered 2) in the lower part of the image (image size 200 × 200 nm). b) histogram of  $Z_{\max}$  values obtained from AFM analysis.



## Computation

**Experimental.** The molecular models for the whole dendrimer series were constructed and parametrized according to a validated procedure.<sup>S1-S3</sup> The dendrimers were built iteratively in consecutive generations from **G1** to **G13** by using the Material Studio software (Accelrys, San Diego, CA, USA). Each built generation underwent to preliminary gas-phase minimization and short molecular dynamics (MD) simulation in order to relax the structure and to eliminate bad contacts within the dendritic scaffold before growing with the next generation. For the larger generations – i.e., **G9**, **G11** and **G13** – this procedure was extremely delicate and time consuming, since complexity increases exponentially with the dendritic generation. For this reason, it has been very hard to obtain an atomistic model for **G13**, which required many steps of minimizations and of MD simulations with increasing temperature and time step. In particular, T was increased from 0 to 1000 K and then the system was cooled down again to 300 K, with increasing time step from 0.5 to 2 femtoseconds (fs) due to high atom velocity in the earlier steps of this phase. The final **G13** model, subject of this study, is composed by different residues – a central (COR) core unit, the repetitive units that compose the flexible branches (BRA) and the terminal groups which constitute the dendrimer’s surface (END). **G13** has 16384 surface groups bearing primary amino-groups that at neutral pH ( $\approx 7.4$ ) are assumed to be protonated. The entire parametrization, simulation work and data analysis were carried out using the AMBER 12 suite of programs.<sup>S4</sup> The partial charges for all of the non-standard residues that constitute **G13** were obtained using the AM1-BCC<sup>S5</sup> calculation method within the *antechamber*<sup>S6</sup> module of AmberTools 12 (AMBER 12). Parameters and force field types were assigned consistently with the “general AMBER force field (GAFF)” (*gaff.dat*)<sup>S7</sup> – such parameters already demonstrated to be well-consistent for the parameterization and the simulation of dendrimers<sup>S1-S2,S8</sup> and dendrons.<sup>S3,S9</sup>

**Comments.** Due to the enormous size of the atomistic model of **G13** (1343416 atoms), for this generation it was not possible to run a molecular dynamics (MD) simulation in explicit solvent, as the number of water molecules introduced in the system largely exceed the maximum size limit that it is currently possible to

simulate. Even the use of a simplified coarse-grained (CG) model to decrease the system size was not practicable in this case. In fact, first, CG models that account the presence of explicit solvent did not allow for the size reduction necessary to run the simulation – the system was still too large. Secondly, regarding the CG simulation of **G13** in absence of explicit solvent, a very coarse model would have been necessary to reduce substantially the size of **G13** to make the use of a CG model convenient. This was incompatible with the highly flexible branches that compose the dendritic scaffold. In fact, the approximation the linear monomers of **G13** into a single, or two-bound beads would not reproduce correctly the flexibility of the molecule nor the surface roughness and irregularity. For this reason, a fully atomistic MD simulation of **G13** was conducted *in vacuo* to obtain a single-molecule view of this large dendrimer. **G13** was initially minimized and then preliminary 100 ps of MD simulation a 1 fs time step were run at 300 K of temperature. **G13** was then equilibrated for 4 ns at 300K, using a time step of 2 fs, the Langevin thermostat and a 12 Å cutoff. The SHAKE algorithm was used on the bonds involving Hydrogen atoms.<sup>S10</sup> The reduced simulation time was sufficient to obtain a molecular picture of the dendrimer, as **G13** reached rapidly the equilibrium due to the high structural crowding and rigidity. Size (radius of gyration) and radial distribution functions (RDF) for **G13** were extracted from the equilibrated phase of the MD trajectories using the *ptraj* module within AMBER 12.

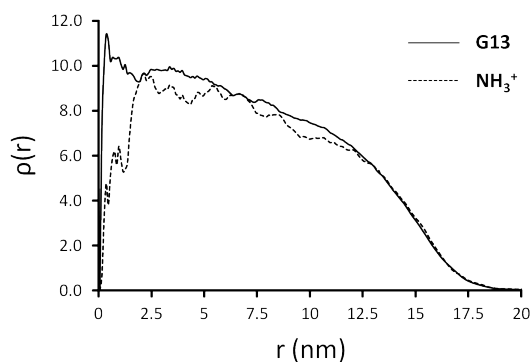

**Figure S45.** Radial distribution function of **G13** showing peripheral amine groups reveal extensive backfolding. observed.

## References

- S1. Garzoni, M.; Cheval, N.; Fahmi, A.; Danani, A.; Pavan, G. M. *J. Am. Chem. Soc.* **2012**, *134*, 3349–57.
- S2. Zheng, M.; Pavan, G. M.; Neeb, M.; Schaper, A. K.; Danani, A.; Klebe, G.; Merkel, O. M.; Kissel, T. *ACS Nano* **2012**, DOI: 10.1021/nn301966r.
- S3. Pavan, G. M.; Danani, A.; Pricl, S.; Smith, D. K. *J. Am. Chem. Soc.*, **2009**, *131*, 9686-9694.
- S4. Case, D. A.; Darden, T. A.; Cheatham III, T. E.; Simmerling, C. L.; Wang, J.; Duke, R. E.; Luo, R.; Walker, R. C.; Zhang, W.; Merz, K. M.; Robertson, B.; Wang, B.; Hayik, S.; Roitberg, A.; Seabra, G.; Swails, J.; Goetz, A. W.; Kolossvary, I.; Wong, K. F.; Paesani, F.; Vanicek, J.; Wolf, R. M.; Liu, J.; Wu, X.; Brozell, S.; Steinbrecher, T.; Gohlke, H.; Cai, Q.; Ye, X.; Wang, J.; Hsieh, M.-J.; Cui, G.; Roe, D.R.; Mathews, D.H.; Seetin, M.G.; Salomon-Ferrer,

R.; Sangui, C.; Babin, V.; Luchko, T.; Gusarov, S.; Kovalenko, A.; Kollman, P. A., AMBER 12. In University of California, San Francisco, **2012**.

S5. a) Jakalian, A.; Bush, B. L.; Jack, D. B.; Bayly, C. I. *J. Comput. Chem.*, **2000**, *21*, 132-146; b) Jakalian, A.; Jack, D. B.; Bayly, C. I. *J. Comput. Chem.*, **2002**, *25*, 1623-1641.

S6. Wang, J.; Wang, W.; Kollman, P.A.; Case, D.A. *J. Mol. Graphics Model.*, **2006**, *25*, 247-260.

S7. Wang, J.; Wolf, R. M.; Caldwell, J. W.; Kollman, P. A.; Case, D. A. *J. Comput. Chem.*, **2004**, *25*, 1157-1174.

S8. a) Lim, J.; Pavan, G. M.; Annunziata, O.; Simanek, E. E. *J. Am. Chem. Soc.* **2012**, *134*, 1942-5; b) Shema-Mizrachi, M.; Pavan, G. M.; Levin, E.; Danani, A.; Lemchoff, N. G. *J. Am. Chem. Soc.* **2011**, *133*, 14359–14367; c) Pavan, G. M.; Mintzer, M. A.; Simanek, E. E.; Merkel, O. M.; Kissel, T.; Danani, A. *Biomacromolecules*, **2010**, *11*, 721–730.

S9. a) Doni, G.; Kostianen, M. A.; Danani, A.; Pavan, G. M. *Nano Lett.*, **2011**, *11*, 723-728; b) Pavan, G. M.; Kostianen, M. A.; Danani, A. *J. Phys. Chem. B.*, **2010**, *114*, 5686–5693; c) Pavan, G. M.; Danani, A.; Pricl, S.; Smith, D. K. *J. Am. Chem. Soc.*, **2009**, *131*, 9686-9694.

S12. a) Ryckaert, J.-P.; Ciccotti, G.; Berendsen, H. J. C. *J. Comput. Phys.*, **1977**, *23*, 327; b) Krautler, V.; van Gunsteren, W. F.; Hanenberger, P. H. *J. Comput. Chem.*, **2001**, *5*, 501.
